# Supplementary material for: Genomic Characteristics of Triple-Negative Breast Cancer Nominate Molecular Subtypes That Predict Chemotherapy Response
Source: Oxford University Press journal article supplement (doi:10.1158/1541-7786.mcr-19-0453), 2019-11-08
Supplement: 15417786mcr190453-sup-221501_4_supp_5861808_q022vd.xlsx [file 15417786mcr190453-sup-221501_4_supp_5861808_q022vd.xlsx]

## Sheet: Supplementary Table S1
GEO_series_ID	GEO_platform_ID	GEO_sample_ID	ER_status	PR_status	HER2_status	lymph_node_status	Relapse	Overall_survival	Meta_free_survival (Disease_free_survival)	Death	Meta_event (Disease_free_event)	Sample_tissue	Age	Grade	EMT_exp	stromal.score	immune.score	microenvironment.score	estimate.stromal	estimate.immune	estimate.purity	stemness.index	CIN	Type	Subtype
GSE103091	GPL570	GSM1419942	Negative	Negative	Negative	NA	NA	50.6667	39.4667	1	1	Breast	72.7912	NA	9.0402	0.1124	0.5259	0.6383	473.481	638.909	0.719112	0.327333	8.45739	meta	LAR
GSE103091	GPL570	GSM1419943	Negative	Negative	Negative	NA	NA	42.7	32.8	1	1	Breast	66.2642	NA	8.42927	0.06	0.6407	0.7007	-141.276	1459.07	0.697837	0.755049	9.9675	meta	SL
GSE103091	GPL570	GSM1419945	Negative	Negative	Negative	NA	NA	35	30.1667	1	1	Breast	49.5496	NA	9.06258	0.2832	0.6392	0.9224	1287.21	1821.22	0.487764	0.333472	9.22723	meta	MSL
GSE103091	GPL570	GSM1419946	Negative	Negative	Negative	NA	NA	14.0667	11.3333	1	1	Breast	84.6325	NA	8.74685	0.2144	0.3644	0.5788	-171.799	-171.223	0.850092	0.416293	8.86185	meta	LAR
GSE103091	GPL570	GSM1419953	Negative	Negative	Negative	NA	NA	16	13.9667	1	1	Breast	65.0568	NA	8.61126	0.0765	0.5541	0.6306	165.145	890.179	0.724907	0.673926	9.89959	meta	SL
GSE103091	GPL570	GSM1419969	Negative	Negative	Negative	NA	NA	25.5667	16.5	1	1	Breast	50.1109	NA	8.46675	0.0306	0.4505	0.4811	-371.997	988.83	0.767713	0.720775	9.9971	meta	SL
GSE103091	GPL570	GSM1419971	Negative	Negative	Negative	NA	NA	29.0333	17.2333	1	1	Breast	65.5551	NA	8.7244	0.0547	0.9764	1.0312	454.928	2550.41	0.500919	0.633857	9.3852	meta	IM
GSE103091	GPL570	GSM1419974	Negative	Negative	Negative	NA	NA	47.6667	26.6333	1	1	Breast	50.5325	NA	8.97282	0.1816	0.5426	0.7242	775.995	837.225	0.66613	0.355967	9.40265	meta	SL
GSE103091	GPL570	GSM1419991	Negative	Negative	Negative	NA	NA	27.4	16.3333	1	1	Breast	74.3765	NA	8.66804	0.0622	0.6986	0.7608	-183.54	1353.58	0.713206	0.797046	9.89037	meta	LAR
GSE103091	GPL570	GSM1419995	Negative	Negative	Negative	NA	NA	34.9	14.4667	1	1	Breast	37.5852	NA	8.5627	0.0454	0.7493	0.7948	-125.105	1552.36	0.686238	0.684691	9.43046	meta	IM
GSE103091	GPL570	GSM1420002	Negative	Negative	Negative	NA	NA	75.3667	48.1	1	1	Breast	58.8583	NA	8.7927	0.1527	0.8642	1.0169	991.817	2163.38	0.48176	0.427531	9.26148	meta	MSL
GSE103091	GPL570	GSM1420019	Negative	Negative	Negative	NA	NA	20.0333	16.6667	1	1	Breast	66.0014	NA	9.19729	0.1252	0.601	0.7262	396.287	897.026	0.700406	0.221818	8.87621	meta	LAR
GSE103091	GPL570	GSM1420021	Negative	Negative	Negative	NA	NA	20.5667	19.9667	1	1	Breast	41.4073	NA	8.89673	0.1671	0.3985	0.5656	373.727	662.61	0.726824	0.436295	9.51203	meta	SL
GSE103091	GPL570	GSM1420028	Negative	Negative	Negative	NA	NA	48.1	38.6	1	1	Breast	50.4203	NA	9.05644	0.138	0.392	0.5299	391.3	313.88	0.759339	0.3972	9.19822	meta	LAR
GSE103091	GPL570	GSM1420032	Negative	Negative	Negative	NA	NA	27.2667	26.1	0	1	Breast	66.3682	NA	9.13191	0.271	0.6603	0.9313	1161.88	1416.94	0.554089	0.343468	9.24157	meta	MSL
GSE103091	GPL570	GSM1420035	Negative	Negative	Negative	NA	NA	32.8667	23.5	1	1	Breast	46.037	NA	8.55067	0.0558	0.5033	0.5591	26.0132	484.309	0.777638	0.678388	10.1405	meta	SL
GSE103091	GPL570	GSM1420039	Negative	Negative	Negative	NA	NA	20.6333	17.5667	1	1	Breast	66.0205	NA	8.18342	0.0298	0.5108	0.5406	-519.275	553.101	0.819675	0.864578	10.2628	meta	SL
GSE103091	GPL570	GSM1420043	Negative	Negative	Negative	NA	NA	29.7333	29.1667	1	1	Breast	58.6749	NA	8.60399	0.1116	0.324	0.4356	28.5384	-327.854	0.846696	0.543379	9.82986	meta	SL
GSE103091	GPL570	GSM1420051	Negative	Negative	Negative	NA	NA	30.1333	26.1	1	1	Breast	52.3258	NA	9.07278	0.178	0.3342	0.5122	417.929	-279.336	0.810769	0.332623	9.30989	meta	SL
GSE103091	GPL570	GSM1420056	Negative	Negative	Negative	NA	NA	46.0333	13.8333	0	1	Breast	47.5838	NA	8.64232	0.0663	0.6256	0.6919	309.371	1258.82	0.671045	0.541269	9.2251	meta	SL
GSE103091	GPL570	GSM1420057	Negative	Negative	Negative	NA	NA	46.3333	34.2333	0	1	Breast	52.4134	NA	8.33371	0.0132	0.5285	0.5418	-274.339	994.37	0.757919	0.745753	9.93623	meta	SL
GSE12276	GPL570	GSM308257	NA	NA	NA	NA	1	NA	25	NA	1	Breast	NA	NA	9.11054	0.1888	0.5904	0.7792	993.851	1357.37	0.581586	0.333776	9.0253	meta	MSL
GSE12276	GPL570	GSM308258	NA	NA	NA	NA	1	NA	23	NA	1	Breast	NA	NA	9.03861	0.1907	0.5841	0.7748	803.588	1230.24	0.618841	0.363536	9.39056	meta	MSL
GSE12276	GPL570	GSM308260	NA	NA	NA	NA	1	NA	20	NA	1	Breast	NA	NA	8.61811	0.029	0.7016	0.7306	658.477	1970.95	0.54789	0.513381	9.25237	meta	LAR
GSE12276	GPL570	GSM308261	NA	NA	NA	NA	1	NA	18	NA	1	Breast	NA	NA	8.77039	0.0202	0.8233	0.8435	462.441	1850.75	0.586118	0.679939	10.0754	meta	SL
GSE12276	GPL570	GSM308262	NA	NA	NA	NA	1	NA	30	NA	1	Breast	NA	NA	8.92576	0.2141	0.7424	0.9565	865.409	1889.84	0.532346	0.522674	9.41569	meta	LAR
GSE12276	GPL570	GSM308263	NA	NA	NA	NA	1	NA	69	NA	1	Breast	NA	NA	9.12159	0.3051	0.29	0.5951	987.853	645.062	0.66397	0.265547	8.7017	meta	MSL
GSE12276	GPL570	GSM308266	NA	NA	NA	NA	1	NA	3	NA	1	Breast	NA	NA	9.23699	0.1668	0.7385	0.9053	1348.64	1804.51	0.482024	0.343747	9.22386	meta	LAR
GSE12276	GPL570	GSM308270	NA	NA	NA	NA	1	NA	7	NA	1	Breast	NA	NA	7.99948	0	0.378	0.378	-1041.08	-93.1815	0.905394	0.758487	9.78436	meta	LAR
GSE12276	GPL570	GSM308273	NA	NA	NA	NA	1	NA	19	NA	1	Breast	NA	NA	8.34059	0	0.9108	0.9108	175.982	2276.16	0.569472	0.847091	10.5467	meta	SL
GSE12276	GPL570	GSM308275	NA	NA	NA	NA	1	NA	7	NA	1	Breast	NA	NA	8.78154	0.0598	0.721	0.7807	166.284	2005.92	0.602759	0.710594	10.0692	meta	SL
GSE12276	GPL570	GSM308277	NA	NA	NA	NA	1	NA	22	NA	1	Breast	NA	NA	8.98153	0.1808	0.4957	0.6765	627.878	1059.04	0.658022	0.414233	9.28907	meta	MSL
GSE12276	GPL570	GSM308280	NA	NA	NA	NA	1	NA	16	NA	1	Breast	NA	NA	8.95522	0.1685	0.8015	0.97	1264.59	2078.75	0.457379	0.516273	9.87654	meta	SL
GSE12276	GPL570	GSM308281	NA	NA	NA	NA	1	NA	5	NA	1	Breast	NA	NA	8.77775	0.1024	0.663	0.7654	643.076	1439.79	0.613171	0.688026	10.1853	meta	SL
GSE12276	GPL570	GSM308282	NA	NA	NA	NA	1	NA	10	NA	1	Breast	NA	NA	8.87391	0.16	0.5891	0.749	644.501	1496.22	0.60644	0.551314	9.53586	meta	IM
GSE12276	GPL570	GSM308283	NA	NA	NA	NA	1	NA	13	NA	1	Breast	NA	NA	8.50974	0.0426	0.9667	1.0093	69.1835	2323.73	0.576597	0.830031	10.3785	meta	SL
GSE12276	GPL570	GSM308285	NA	NA	NA	NA	1	NA	7	NA	1	Breast	NA	NA	7.69474	0.0398	0.3537	0.3935	-1510.94	-871.2	0.967583	0.818316	9.86431	meta	SL
GSE12276	GPL570	GSM308287	NA	NA	NA	NA	1	NA	42	NA	1	Breast	NA	NA	9.15968	0.289	0.5679	0.8569	822.117	1039.24	0.638528	0.317237	8.71648	meta	MSL
GSE12276	GPL570	GSM308288	NA	NA	NA	NA	1	NA	10	NA	1	Breast	NA	NA	9.23887	0.1962	0.4675	0.6638	1148.35	960.896	0.610107	0.283026	8.93219	meta	MSL
GSE12276	GPL570	GSM308289	NA	NA	NA	NA	1	NA	61	NA	1	Breast	NA	NA	8.78821	0.097	0.4744	0.5714	304.782	690.453	0.730955	0.568627	9.72113	meta	LAR
GSE12276	GPL570	GSM308291	NA	NA	NA	NA	1	NA	25	NA	1	Breast	NA	NA	9.19601	0.1407	0.9892	1.13	1296.14	2620.43	0.381022	0.463247	9.53723	meta	SL
GSE12276	GPL570	GSM308293	NA	NA	NA	NA	1	NA	5	NA	1	Breast	NA	NA	9.09602	0.2009	0.8493	1.0502	1025.55	2234.8	0.468177	0.39522	8.93741	meta	MSL
GSE12276	GPL570	GSM308295	NA	NA	NA	NA	1	NA	11	NA	1	Breast	NA	NA	8.29222	0.1147	0.4645	0.5792	-61.4144	1153.27	0.721203	0.853926	10.193	meta	SL
GSE12276	GPL570	GSM308297	NA	NA	NA	NA	1	NA	14	NA	1	Breast	NA	NA	8.76401	0.2098	0.4345	0.6443	191.927	651.469	0.745982	0.589802	9.44668	meta	LAR
GSE12276	GPL570	GSM308300	NA	NA	NA	NA	1	NA	29	NA	1	Breast	NA	NA	9.10234	0.1969	0.6671	0.864	938.089	1481.74	0.573364	0.333805	8.72842	meta	LAR
GSE12276	GPL570	GSM308302	NA	NA	NA	NA	1	NA	24	NA	1	Breast	NA	NA	9.36929	0.3435	0.7566	1.1001	1855.03	1754.09	0.422346	0.0982592	7.78378	meta	MSL
GSE12276	GPL570	GSM308303	NA	NA	NA	NA	1	NA	39	NA	1	Breast	NA	NA	8.71609	0.1204	0.4131	0.5335	206.647	725.843	0.737209	0.567581	9.81228	meta	LAR
GSE12276	GPL570	GSM308304	NA	NA	NA	NA	1	NA	54	NA	1	Breast	NA	NA	9.16221	0.1926	0.6877	0.8803	1267.4	1828.28	0.489397	0.265585	8.4463	meta	MSL
GSE12276	GPL570	GSM308307	NA	NA	NA	NA	1	NA	29	NA	1	Breast	NA	NA	8.54427	0.0506	0.6033	0.6539	-279.291	1273.63	0.731044	0.822951	10.2052	meta	SL
GSE12276	GPL570	GSM308309	NA	NA	NA	NA	1	NA	20	NA	1	Breast	NA	NA	8.7756	0.1656	0.5221	0.6878	364.207	980.963	0.694952	0.579086	9.59176	meta	SL
GSE12276	GPL570	GSM308311	NA	NA	NA	NA	1	NA	36	NA	1	Breast	NA	NA	8.08581	0.011	0.4957	0.5066	-667.684	914.352	0.801381	1	10.5641	meta	SL
GSE12276	GPL570	GSM308313	NA	NA	NA	NA	1	NA	4	NA	1	Breast	NA	NA	8.36353	0.1405	0.4067	0.5471	192.569	1003.55	0.710517	0.635862	10.3158	meta	SL
GSE12276	GPL570	GSM308314	NA	NA	NA	NA	1	NA	8	NA	1	Breast	NA	NA	8.3827	0.134	0.7854	0.9194	575.434	1881.27	0.568921	0.79243	10.4036	meta	SL
GSE12276	GPL570	GSM308315	NA	NA	NA	NA	1	NA	60	NA	1	Breast	NA	NA	8.78804	0.1531	0.4806	0.6337	126.618	940.283	0.723736	0.423524	8.76787	meta	LAR
GSE12276	GPL570	GSM308316	NA	NA	NA	NA	1	NA	0	NA	1	Breast	NA	NA	8.64723	0.3034	0.3465	0.65	697.068	-72.5061	0.766986	0.320776	8.59226	meta	SL
GSE12276	GPL570	GSM308319	NA	NA	NA	NA	1	NA	15	NA	1	Breast	NA	NA	8.98783	0.1503	0.6731	0.8234	911.81	1208.75	0.608791	0.499183	9.87459	meta	SL
GSE12276	GPL570	GSM308321	NA	NA	NA	NA	1	NA	0	NA	1	Breast	NA	NA	8.98183	0.087	0.6339	0.7209	757.074	1253.34	0.621538	0.516485	9.52295	meta	LAR
GSE12276	GPL570	GSM308322	NA	NA	NA	NA	1	NA	27	NA	1	Breast	NA	NA	8.47974	0.1221	0.4019	0.524	-144.095	24.9622	0.832329	0.559743	9.73948	meta	LAR
GSE12276	GPL570	GSM308324	NA	NA	NA	NA	1	NA	14	NA	1	Breast	NA	NA	8.58291	0.0216	0.3241	0.3457	-526.698	502.74	0.824504	0.58612	9.73924	meta	SL
GSE12276	GPL570	GSM308325	NA	NA	NA	NA	1	NA	13	NA	1	Breast	NA	NA	8.39288	0.1376	0.4044	0.542	-497.785	9.50884	0.861127	0.569632	9.77192	meta	LAR
GSE12276	GPL570	GSM308328	NA	NA	NA	NA	1	NA	16	NA	1	Breast	NA	NA	8.44953	0.09	0.2717	0.3616	-731.873	-163.665	0.889963	0.662471	9.98229	meta	SL
GSE12276	GPL570	GSM308330	NA	NA	NA	NA	1	NA	0	NA	1	Breast	NA	NA	8.27385	0.0503	0.5127	0.563	-821.792	451.959	0.852158	0.670954	9.58704	meta	SL
GSE12276	GPL570	GSM308331	NA	NA	NA	NA	1	NA	0	NA	1	Breast	NA	NA	8.77404	0.1828	0.5018	0.6846	523.268	1314.32	0.641208	0.460363	9.09491	meta	LAR
GSE12276	GPL570	GSM308332	NA	NA	NA	NA	1	NA	38	NA	1	Breast	NA	NA	8.9572	0.276	0.3958	0.6719	879.39	125.553	0.729982	0.178886	7.87473	meta	MSL
GSE12276	GPL570	GSM308333	NA	NA	NA	NA	1	NA	18	NA	1	Breast	NA	NA	8.5765	0.0208	0.9401	0.9608	444.127	2785.38	0.472174	0.807807	10.2057	meta	IM
GSE12276	GPL570	GSM308335	NA	NA	NA	NA	1	NA	50	NA	1	Breast	NA	NA	8.33716	0.0894	0.356	0.4454	-868.371	836.813	0.825135	0.722445	10.2034	meta	SL
GSE12276	GPL570	GSM308336	NA	NA	NA	NA	1	NA	8	NA	1	Breast	NA	NA	8.76744	0.1054	0.8467	0.9521	668.788	2281.94	0.507841	0.515875	9.63044	meta	SL
GSE12276	GPL570	GSM308338	NA	NA	NA	NA	1	NA	10	NA	1	Breast	NA	NA	8.64811	0.103	0.4751	0.5781	274.544	951.077	0.707463	0.721489	10.1186	meta	SL
GSE12276	GPL570	GSM308339	NA	NA	NA	NA	1	NA	3	NA	1	Breast	NA	NA	7.72044	0.0018	0.2151	0.2169	-1695.68	-1154.28	0.982632	0.859039	10.6422	meta	SL
GSE12276	GPL570	GSM308340	NA	NA	NA	NA	1	NA	60	NA	1	Breast	NA	NA	8.51251	0.0938	0.4616	0.5554	-403.955	300.276	0.83107	0.694099	9.27977	meta	LAR
GSE12276	GPL570	GSM308344	NA	NA	NA	NA	1	NA	6	NA	1	Breast	NA	NA	8.61122	0.1513	0.4507	0.602	169.729	714.916	0.741936	0.630442	9.45134	meta	LAR
GSE12276	GPL570	GSM308346	NA	NA	NA	NA	1	NA	13	NA	1	Breast	NA	NA	9.01161	0.2002	0.724	0.9242	594.902	1782.04	0.57851	0.216442	9.30226	meta	SL
GSE12276	GPL570	GSM308347	NA	NA	NA	NA	1	NA	6	NA	1	Breast	NA	NA	8.62786	0.1204	0.4097	0.5301	254.27	818.486	0.723142	0.505334	9.73846	meta	LAR
GSE12276	GPL570	GSM308348	NA	NA	NA	NA	1	NA	25	NA	1	Breast	NA	NA	8.73381	0.1772	0.7439	0.9211	323.303	1826.98	0.605324	0.58723	9.72783	meta	SL
GSE12276	GPL570	GSM308349	NA	NA	NA	NA	1	NA	4	NA	1	Breast	NA	NA	9.19223	0.2191	0.6478	0.8669	1232.6	1584.5	0.524639	0.333651	9.5161	meta	LAR
GSE12276	GPL570	GSM308350	NA	NA	NA	NA	1	NA	15	NA	1	Breast	NA	NA	8.72355	0.0725	0.9953	1.0678	767.592	2619.75	0.451626	0.738386	10.0455	meta	SL
GSE12276	GPL570	GSM308352	NA	NA	NA	NA	1	NA	0	NA	1	Breast	NA	NA	9.01752	0.1352	0.8553	0.9904	954.215	2223.64	0.478844	0.53011	9.7029	meta	SL
GSE12276	GPL570	GSM308354	NA	NA	NA	NA	1	NA	21	NA	1	Breast	NA	NA	8.92374	0.1182	0.4196	0.5378	254.745	1073.86	0.696699	0.606395	10.0245	meta	SL
GSE12276	GPL570	GSM308356	NA	NA	NA	NA	1	NA	18	NA	1	Breast	NA	NA	8.48772	0.1046	0.4798	0.5844	219.564	682.444	0.740225	0.58008	10.0328	meta	SL
GSE12276	GPL570	GSM308358	NA	NA	NA	NA	1	NA	0	NA	1	Breast	NA	NA	8.77821	0.0537	0.4027	0.4564	291.099	167.495	0.782389	0.37859	8.45338	meta	LAR
GSE12276	GPL570	GSM308359	NA	NA	NA	NA	1	NA	36	NA	1	Breast	NA	NA	8.59789	0.0846	0.5942	0.6788	-94.3435	771.559	0.762004	0.473952	9.06921	meta	LAR
GSE12276	GPL570	GSM308360	NA	NA	NA	NA	1	NA	39	NA	1	Breast	NA	NA	8.60342	0.1184	0.6184	0.7368	209.363	758.362	0.733705	0.567548	9.42198	meta	LAR
GSE12276	GPL570	GSM308361	NA	NA	NA	NA	1	NA	27	NA	1	Breast	NA	NA	8.80492	0.1676	1.0144	1.182	1006.82	2362.45	0.45399	0.5848	9.72879	meta	IM
GSE12276	GPL570	GSM308363	NA	NA	NA	NA	1	NA	22	NA	1	Breast	NA	NA	9.2946	0.2058	0.589	0.7948	1449.59	1311.07	0.531674	0.106171	8.71125	meta	MSL
GSE12276	GPL570	GSM308364	NA	NA	NA	NA	1	NA	29	NA	1	Breast	NA	NA	8.16412	0.2208	1.5409	1.7617	1283.4	3562.34	0.251772	0.382383	7.32878	meta	MSL
GSE12276	GPL570	GSM308365	NA	NA	NA	NA	1	NA	11	NA	1	Breast	NA	NA	8.97745	0.0312	0.7071	0.7382	849.349	2040.64	0.515501	0.538786	9.49832	meta	SL
GSE12276	GPL570	GSM308366	NA	NA	NA	NA	1	NA	58	NA	1	Breast	NA	NA	9.12042	0.3542	0.9909	1.345	1944.42	2984.93	0.239875	0.203771	8.4618	meta	MSL
GSE12276	GPL570	GSM308367	NA	NA	NA	NA	1	NA	40	NA	1	Breast	NA	NA	9.06323	0.1076	0.7037	0.8113	1161.78	1889.02	0.495132	0.388095	9.28217	meta	LAR
GSE12276	GPL570	GSM308368	NA	NA	NA	NA	1	NA	48	NA	1	Breast	NA	NA	9.03663	0.1996	0.3897	0.5893	656.742	380.97	0.726686	0.34264	9.28417	meta	LAR
GSE12276	GPL570	GSM308369	NA	NA	NA	NA	1	NA	38	NA	1	Breast	NA	NA	8.83508	0.0824	0.6194	0.7019	506.226	1292.16	0.645613	0.438497	9.19901	meta	LAR
GSE12276	GPL570	GSM308372	NA	NA	NA	NA	1	NA	85	NA	1	Breast	NA	NA	8.75117	0.0687	0.851	0.9197	559.526	2097.56	0.544489	0.592881	9.86255	meta	LAR
GSE12276	GPL570	GSM308374	NA	NA	NA	NA	1	NA	6	NA	1	Breast	NA	NA	8.7282	0.1059	0.9385	1.0444	529.245	2390.31	0.511778	0.655652	10.1762	meta	IM
GSE12276	GPL570	GSM308375	NA	NA	NA	NA	1	NA	28	NA	1	Breast	NA	NA	9.01729	0.2049	0.4849	0.6898	727.521	552.231	0.701825	0.436594	9.56202	meta	LAR
GSE12276	GPL570	GSM308376	NA	NA	NA	NA	1	NA	6	NA	1	Breast	NA	NA	8.02781	0.0609	0.5625	0.6234	-904.92	126.024	0.882025	0.939012	10.5056	meta	SL
GSE12276	GPL570	GSM308377	NA	NA	NA	NA	1	NA	19	NA	1	Breast	NA	NA	8.79138	0.0566	0.9258	0.9824	173.966	2298.72	0.56699	0.652739	10.1585	meta	SL
GSE12276	GPL570	GSM308378	NA	NA	NA	NA	1	NA	15	NA	1	Breast	NA	NA	8.53161	0.0391	0.6944	0.7335	55.4862	1687.08	0.651849	0.776219	10.1706	meta	SL
GSE12276	GPL570	GSM308379	NA	NA	NA	NA	1	NA	19	NA	1	Breast	NA	NA	8.75563	0.124	0.8567	0.9807	564.229	1879.91	0.570437	0.470686	8.85663	meta	LAR
GSE12276	GPL570	GSM308381	NA	NA	NA	NA	1	NA	115	NA	1	Breast	NA	NA	9.19762	0.1532	0.4599	0.6131	1381.83	939.296	0.585174	0.198656	8.47221	meta	MSL
GSE12276	GPL570	GSM308382	NA	NA	NA	NA	1	NA	46	NA	1	Breast	NA	NA	8.9653	0.1017	0.6157	0.7174	510.714	738.092	0.705054	0.261448	7.85226	meta	LAR
GSE12276	GPL570	GSM308384	NA	NA	NA	NA	1	NA	32	NA	1	Breast	NA	NA	9.24139	0.2052	0.8051	1.0103	1581.87	1977.45	0.42896	0.251696	8.62665	meta	MSL
GSE12276	GPL570	GSM308385	NA	NA	NA	NA	1	NA	27	NA	1	Breast	NA	NA	9.23031	0.2574	0.7255	0.9829	1607.46	2106.88	0.408297	0.350694	8.74715	meta	MSL
GSE12276	GPL570	GSM308387	NA	NA	NA	NA	1	NA	4	NA	1	Breast	NA	NA	8.95038	0.119	0.6094	0.7284	867.822	1068.49	0.630022	0.401368	9.76691	meta	SL
GSE12276	GPL570	GSM308389	NA	NA	NA	NA	1	NA	15	NA	1	Breast	NA	NA	8.64514	0.145	0.3843	0.5293	-182.87	26.339	0.835359	0.569395	9.19411	meta	LAR
GSE12276	GPL570	GSM308390	NA	NA	NA	NA	1	NA	61	NA	1	Breast	NA	NA	8.93635	0.1203	0.5834	0.7037	492.887	1370.02	0.638352	0.377298	8.90515	meta	MSL
GSE12276	GPL570	GSM308391	NA	NA	NA	NA	1	NA	7	NA	1	Breast	NA	NA	8.59566	0.0396	0.6408	0.6804	-236.384	1488.63	0.704695	0.765032	10.2829	meta	SL
GSE12276	GPL570	GSM308392	NA	NA	NA	NA	1	NA	6	NA	1	Breast	NA	NA	8.97438	0.0912	0.9634	1.0546	1247.4	2565.62	0.395032	0.436868	9.76684	meta	SL
GSE12276	GPL570	GSM308393	NA	NA	NA	NA	1	NA	33	NA	1	Breast	NA	NA	8.82064	0.2088	0.4224	0.6311	118.507	590.508	0.758973	0.558682	9.85108	meta	SL
GSE12276	GPL570	GSM308394	NA	NA	NA	NA	1	NA	22	NA	1	Breast	NA	NA	8.70544	0.0446	0.5618	0.6064	21.5912	1575.26	0.667919	0.77642	10.4182	meta	SL
GSE12276	GPL570	GSM308395	NA	NA	NA	NA	1	NA	34	NA	1	Breast	NA	NA	8.43501	0.0082	0.3743	0.3825	-525.113	-286.599	0.884284	0.478851	9.35355	meta	LAR
GSE12276	GPL570	GSM308397	NA	NA	NA	NA	1	NA	43	NA	1	Breast	NA	NA	8.86107	0	1.1438	1.1438	635.352	2853.76	0.438248	0.593896	9.43434	meta	IM
GSE12276	GPL570	GSM308398	NA	NA	NA	NA	1	NA	12	NA	1	Breast	NA	NA	8.21607	0.0222	0.7817	0.8039	-596.56	1512.69	0.738829	0.933779	10.4602	meta	SL
GSE12276	GPL570	GSM308399	NA	NA	NA	NA	1	NA	38	NA	1	Breast	NA	NA	8.64596	0.1124	0.6056	0.7181	400.345	932.902	0.69621	0.626315	9.82602	meta	LAR
GSE12276	GPL570	GSM308400	NA	NA	NA	NA	1	NA	11	NA	1	Breast	NA	NA	8.7843	0.1146	0.5862	0.7008	492.374	1295.08	0.646838	0.567083	9.89186	meta	SL
GSE12276	GPL570	GSM308403	NA	NA	NA	NA	1	NA	11	NA	1	Breast	NA	NA	8.93688	0.158	0.4847	0.6427	817.211	860.569	0.659032	0.434929	9.29285	meta	LAR
GSE12276	GPL570	GSM308404	NA	NA	NA	NA	1	NA	8	NA	1	Breast	NA	NA	8.50341	0.0768	0.3187	0.3955	-671.176	-49.4235	0.87796	0.688588	10.0664	meta	SL
GSE12276	GPL570	GSM308407	NA	NA	NA	NA	1	NA	94	NA	1	Breast	NA	NA	8.69626	0.019	0.9756	0.9946	368.795	2244.97	0.549811	0.72873	9.97488	meta	IM
GSE12276	GPL570	GSM308408	NA	NA	NA	NA	1	NA	4	NA	1	Breast	NA	NA	8.60121	0.0254	0.5265	0.552	262.362	614.041	0.742747	0.726393	9.94665	meta	SL
GSE12276	GPL570	GSM308410	NA	NA	NA	NA	1	NA	38	NA	1	Breast	NA	NA	8.96247	0.0929	0.4839	0.5768	513.285	921.802	0.685402	0.378516	8.98326	meta	LAR
GSE12276	GPL570	GSM308411	NA	NA	NA	NA	1	NA	11	NA	1	Breast	NA	NA	8.93158	0.2219	0.5616	0.7835	837.65	1698.26	0.559321	0.408594	9.15281	meta	MSL
GSE12276	GPL570	GSM308413	NA	NA	NA	NA	1	NA	49	NA	1	Breast	NA	NA	8.52417	0.1996	0.4937	0.6934	134.937	455.705	0.770171	0.402318	8.90235	meta	LAR
GSE12276	GPL570	GSM308414	NA	NA	NA	NA	1	NA	97	NA	1	Breast	NA	NA	9.1239	0.1462	0.7085	0.8547	828.4	2196.61	0.498418	0.38771	9.29768	meta	MSL
GSE12276	GPL570	GSM308415	NA	NA	NA	NA	1	NA	50	NA	1	Breast	NA	NA	9.18518	0.2013	0.6231	0.8243	1585.63	1867.27	0.443018	0.211415	8.99339	meta	LAR
GSE12276	GPL570	GSM308418	NA	NA	NA	NA	1	NA	25	NA	1	Breast	NA	NA	9.06219	0.1878	0.709	0.8968	1312.56	1647.85	0.506616	0.221467	8.95849	meta	MSL
GSE12276	GPL570	GSM308420	NA	NA	NA	NA	1	NA	36	NA	1	Breast	NA	NA	8.78688	0.1467	0.6085	0.7552	349.716	696.197	0.725858	0.453764	9.62539	meta	LAR
GSE12276	GPL570	GSM308422	NA	NA	NA	NA	1	NA	16	NA	1	Breast	NA	NA	8.85034	0.2488	0.4699	0.7187	808.541	674.929	0.680213	0.372871	8.83216	meta	LAR
GSE12276	GPL570	GSM308423	NA	NA	NA	NA	1	NA	35	NA	1	Breast	NA	NA	8.18427	0.0298	0.7076	0.7375	-377.95	1043.82	0.763081	0.666913	9.82627	meta	LAR
GSE12276	GPL570	GSM308424	NA	NA	NA	NA	1	NA	23	NA	1	Breast	NA	NA	8.69022	0.0726	0.7133	0.7858	424.351	1834.7	0.592538	0.457645	9.66619	meta	LAR
GSE12276	GPL570	GSM308427	NA	NA	NA	NA	1	NA	42	NA	1	Breast	NA	NA	8.6638	0.0162	0.837	0.8532	241.136	1609.09	0.639785	0.627767	9.73647	meta	LAR
GSE12276	GPL570	GSM308428	NA	NA	NA	NA	1	NA	17	NA	1	Breast	NA	NA	8.99704	0.2356	0.5042	0.7398	699.508	1301.53	0.622615	0.358072	8.89518	meta	MSL
GSE12276	GPL570	GSM308430	NA	NA	NA	NA	1	NA	55	NA	1	Breast	NA	NA	8.73038	0.0416	1.0747	1.1163	757.188	2543.36	0.462956	0.652796	9.93209	meta	IM
GSE12276	GPL570	GSM308431	NA	NA	NA	NA	1	NA	23	NA	1	Breast	NA	NA	9.12558	0.356	0.6071	0.9631	1006.22	1280.96	0.589207	0.244703	8.76624	meta	MSL
GSE12276	GPL570	GSM308432	NA	NA	NA	NA	1	NA	40	NA	1	Breast	NA	NA	8.95689	0.195	0.7301	0.9251	1041.09	1736.73	0.529539	0.221762	8.39863	meta	LAR
GSE12276	GPL570	GSM308435	NA	NA	NA	NA	1	NA	26	NA	1	Breast	NA	NA	8.62992	0.107	0.6364	0.7434	261.659	1904.48	0.603469	0.629424	9.88796	meta	LAR
GSE12276	GPL570	GSM308436	NA	NA	NA	NA	1	NA	21	NA	1	Breast	NA	NA	9.30466	0.3447	0.7911	1.1358	1352.34	2304.92	0.41593	0.174546	8.77228	meta	MSL
GSE12276	GPL570	GSM308437	NA	NA	NA	NA	1	NA	35	NA	1	Breast	NA	NA	8.3275	0.055	0.3289	0.384	-802.254	-113.555	0.891316	0.437785	8.77642	meta	LAR
GSE12276	GPL570	GSM308438	NA	NA	NA	NA	1	NA	35	NA	1	Breast	NA	NA	9.32791	0.2804	0.5537	0.8341	612.687	514.936	0.717556	0.319933	9.01083	meta	MSL
GSE12276	GPL570	GSM308439	NA	NA	NA	NA	1	NA	4	NA	1	Breast	NA	NA	8.73987	0.1526	0.7802	0.9328	756.265	2146.36	0.513911	0.515035	9.79628	meta	LAR
GSE12276	GPL570	GSM308441	NA	NA	NA	NA	1	NA	42	NA	1	Breast	NA	NA	9.11264	0.2199	0.4689	0.6888	1057.85	572.078	0.664298	0.23565	8.74616	meta	LAR
GSE12276	GPL570	GSM308442	NA	NA	NA	NA	1	NA	18	NA	1	Breast	NA	NA	8.82259	0.2357	0.4247	0.6604	585.199	475.89	0.724324	0.228486	8.25374	meta	LAR
GSE12276	GPL570	GSM308443	NA	NA	NA	NA	1	NA	14	NA	1	Breast	NA	NA	8.54789	0.0928	1.2974	1.3902	649.027	3436.87	0.357927	0.778658	9.91131	meta	IM
GSE12276	GPL570	GSM308444	NA	NA	NA	NA	1	NA	16	NA	1	Breast	NA	NA	9.0274	0.1906	0.7459	0.9366	811.261	1813.56	0.548455	0.397326	9.03278	meta	MSL
GSE12276	GPL570	GSM308447	NA	NA	NA	NA	1	NA	24	NA	1	Breast	NA	NA	9.21778	0.2462	0.6839	0.9302	1319.82	1885.36	0.475319	0.219683	8.53021	meta	MSL
GSE12276	GPL570	GSM308448	NA	NA	NA	NA	1	NA	25	NA	1	Breast	NA	NA	9.3613	0.2751	0.4884	0.7635	1268.85	1043.71	0.586193	0.11172	8.50553	meta	MSL
GSE12276	GPL570	GSM308449	NA	NA	NA	NA	1	NA	47	NA	1	Breast	NA	NA	9.08286	0.1429	1.0418	1.1847	1386.02	2940.38	0.324747	0.426997	9.56764	meta	IM
GSE12276	GPL570	GSM308450	NA	NA	NA	NA	1	NA	33	NA	1	Breast	NA	NA	9.01382	0.2289	0.7331	0.962	474.437	1338.71	0.643958	0.444836	9.17234	meta	MSL
GSE12276	GPL570	GSM308452	NA	NA	NA	NA	1	NA	25	NA	1	Breast	NA	NA	8.76911	0.1504	0.3935	0.5439	99.7541	389.467	0.779581	0.415429	8.84587	meta	LAR
GSE12276	GPL570	GSM308454	NA	NA	NA	NA	1	NA	73	NA	1	Breast	NA	NA	8.87276	0.1794	0.4694	0.6488	700.214	572.293	0.702582	0.214993	7.98944	meta	LAR
GSE12276	GPL570	GSM308456	NA	NA	NA	NA	1	NA	28	NA	1	Breast	NA	NA	8.4609	0.0912	0.3785	0.4697	-276.96	54.416	0.840647	0.603707	10.0174	meta	LAR
GSE12276	GPL570	GSM308458	NA	NA	NA	NA	1	NA	9	NA	1	Breast	NA	NA	9.01096	0.1451	0.6387	0.7838	1122.93	1131.51	0.593083	0.2345	9.12918	meta	MSL
GSE12276	GPL570	GSM308460	NA	NA	NA	NA	1	NA	107	NA	1	Breast	NA	NA	9.12958	0.2749	0.7595	1.0344	1472.68	1636.67	0.487646	0.17825	8.65783	meta	MSL
GSE14017	GPL570	GSM352095	NA	NA	NA	NA	NA	NA	NA	NA	1	Lung	NA	NA	8.60464	0.2232	0.4291	0.6524	-32.6572	1265.27	0.706737	0.497798	8.92962	meta	SL
GSE14017	GPL570	GSM352097	NA	NA	NA	NA	NA	NA	NA	NA	1	Brain	NA	NA	8.57854	0.1122	0.4012	0.5134	35.1905	842.283	0.742641	0.65846	10.1611	meta	LAR
GSE14017	GPL570	GSM352100	NA	NA	NA	NA	NA	NA	NA	NA	1	Bone	NA	NA	9.44626	0.3996	0.4965	0.8962	1672.21	1521.66	0.476778	0.0618434	8.47666	meta	MSL
GSE14017	GPL570	GSM352103	NA	NA	NA	NA	NA	NA	NA	NA	1	Bone	NA	NA	8.3532	0.107	0.3968	0.5038	431.368	532.515	0.734088	0.480021	9.79911	meta	SL
GSE14017	GPL570	GSM352105	NA	NA	NA	NA	NA	NA	NA	NA	1	Bone	NA	NA	8.5875	0.1464	0.5845	0.7309	843.297	1631.06	0.566788	0.393128	9.75528	meta	SL
GSE14017	GPL570	GSM352107	NA	NA	NA	NA	NA	NA	NA	NA	1	Brain	NA	NA	8.59731	0.1594	0.4151	0.5745	-244.254	645.91	0.787567	0.72826	9.97661	meta	SL
GSE14017	GPL570	GSM352109	NA	NA	NA	NA	NA	NA	NA	NA	1	Bone	NA	NA	9.26328	0.0932	0.7554	0.8486	961.708	1950.38	0.512719	0.295167	8.54264	meta	MSL
GSE14017	GPL570	GSM352110	NA	NA	NA	NA	NA	NA	NA	NA	1	Brain	NA	NA	8.97362	0.1512	0.4033	0.5545	79.2105	465.063	0.774495	0.446838	9.54403	meta	LAR
GSE14017	GPL570	GSM352113	NA	NA	NA	NA	NA	NA	NA	NA	1	Brain	NA	NA	8.48762	0.0945	0.4381	0.5325	-141.784	546.209	0.787316	0.516949	9.45098	meta	SL
GSE14017	GPL570	GSM352119	NA	NA	NA	NA	NA	NA	NA	NA	1	Bone	NA	NA	9.06587	0.1236	0.2525	0.376	252.379	512.1	0.753647	0.476074	9.22255	meta	LAR
GSE14017	GPL570	GSM352120	NA	NA	NA	NA	NA	NA	NA	NA	1	Brain	NA	NA	8.12831	0.0822	0.3325	0.4147	-492.36	-228.25	0.877961	0.592233	10.1771	meta	SL
GSE14017	GPL570	GSM352121	NA	NA	NA	NA	NA	NA	NA	NA	1	Brain	NA	NA	8.42059	0.1588	0.5263	0.6851	-110.554	463.43	0.791959	0.690274	9.4004	meta	SL
GSE14017	GPL570	GSM352122	NA	NA	NA	NA	NA	NA	NA	NA	1	Brain	NA	NA	8.42279	0.0478	0.3345	0.3823	-786.758	175.821	0.870141	0.755678	9.96981	meta	SL
GSE14017	GPL570	GSM352125	NA	NA	NA	NA	NA	NA	NA	NA	1	Brain	NA	NA	8.28673	0.154	0.1953	0.3493	-436.508	-511.271	0.893434	0.676449	10.2609	meta	SL
GSE14017	GPL570	GSM352126	NA	NA	NA	NA	NA	NA	NA	NA	1	Bone	NA	NA	9.17307	0.2752	0.5049	0.7801	1483.17	1290.35	0.530075	0.107486	8.94716	meta	MSL
GSE14017	GPL570	GSM352127	NA	NA	NA	NA	NA	NA	NA	NA	1	Lung	NA	NA	9.54919	0.2636	1.1715	1.435	1515.12	2943.33	0.306354	0.13277	7.6169	meta	MSL
GSE14018	GPL96	GSM352133	NA	NA	NA	NA	NA	NA	NA	NA	1	Lung	NA	NA	8.94102	0.1381	0.4413	0.5794	458.879	452.408	0.739308	0.431532	8.89639	meta	LAR
GSE14018	GPL96	GSM352134	NA	NA	NA	NA	NA	NA	NA	NA	1	Lung	NA	NA	8.96951	0.1935	0.2273	0.4208	286.458	-114.731	0.807913	0.304023	8.80369	meta	MSL
GSE14018	GPL96	GSM352135	NA	NA	NA	NA	NA	NA	NA	NA	1	Lung	NA	NA	8.90045	0.1943	0.3613	0.5556	430.76	411.5	0.746093	0.328638	8.90572	meta	LAR
GSE14018	GPL96	GSM352138	NA	NA	NA	NA	NA	NA	NA	NA	1	Lung	NA	NA	8.36573	0.0794	0.6116	0.691	-368.433	885.622	0.777004	0.890066	10.7511	meta	SL
GSE14018	GPL96	GSM352139	NA	NA	NA	NA	NA	NA	NA	NA	1	Liver	NA	NA	8.91024	0.1768	0.7007	0.8774	780.634	1674.03	0.569167	0.376136	8.40457	meta	LAR
GSE14018	GPL96	GSM352140	NA	NA	NA	NA	NA	NA	NA	NA	1	Brain	NA	NA	8.48938	0.1061	0.2775	0.3836	-129.769	128.113	0.822648	0.703435	10.4725	meta	LAR
GSE14018	GPL96	GSM352141	NA	NA	NA	NA	NA	NA	NA	NA	1	Lung	NA	NA	9.08805	0.0936	1.4465	1.5401	1511.17	3624.77	0.210331	0.37173	9.03692	meta	IM
GSE14018	GPL96	GSM352143	NA	NA	NA	NA	NA	NA	NA	NA	1	Lung	NA	NA	8.98244	0.22	0.4845	0.7044	879.279	1017.19	0.634552	0.295936	8.86233	meta	MSL
GSE14018	GPL96	GSM352145	NA	NA	NA	NA	NA	NA	NA	NA	1	Lung	NA	NA	8.48811	0.0542	0.6884	0.7426	-20.4636	1664.95	0.6627	0.749477	10.2847	meta	SL
GSE14018	GPL96	GSM352146	NA	NA	NA	NA	NA	NA	NA	NA	1	Liver	NA	NA	8.69436	0.1446	0.3047	0.4493	6.58735	377.154	0.789185	0.410282	8.47433	meta	LAR
GSE14018	GPL96	GSM352147	NA	NA	NA	NA	NA	NA	NA	NA	1	Lung	NA	NA	8.89811	0.1048	0.6274	0.7322	238.881	1498.09	0.652472	0.436131	9.09873	meta	LAR
GSE14018	GPL96	GSM352148	NA	NA	NA	NA	NA	NA	NA	NA	1	Brain	NA	NA	8.63612	0.121	0.2594	0.3804	-382.754	216.242	0.836164	0.582485	9.66936	meta	LAR
GSE14018	GPL96	GSM352149	NA	NA	NA	NA	NA	NA	NA	NA	1	Bone	NA	NA	8.64165	0.194	0.3285	0.5225	-34.4197	-19.8348	0.827013	0.403478	8.81554	meta	LAR
GSE14018	GPL96	GSM352150	NA	NA	NA	NA	NA	NA	NA	NA	1	Brain	NA	NA	8.52157	0.1282	0.385	0.5132	-463.532	-23.6923	0.861049	0.756117	10.1873	meta	SL
GSE14018	GPL96	GSM352151	NA	NA	NA	NA	NA	NA	NA	NA	1	Bone	NA	NA	9.09721	0.131	0.5488	0.6798	760.142	1041.79	0.645216	0.319898	8.77491	meta	LAR
GSE14018	GPL96	GSM352152	NA	NA	NA	NA	NA	NA	NA	NA	1	Brain	NA	NA	8.90388	0.1383	0.2922	0.4305	-117.341	20.2128	0.830534	0.496775	9.82465	meta	LAR
GSE14018	GPL96	GSM352153	NA	NA	NA	NA	NA	NA	NA	NA	1	Brain	NA	NA	8.478	0.064	0.2045	0.2685	-642.517	-525.642	0.907495	0.672914	10.3664	meta	SL
GSE14018	GPL96	GSM352154	NA	NA	NA	NA	NA	NA	NA	NA	1	Bone	NA	NA	9.01474	0.2616	0.3837	0.6452	1301.59	746.878	0.617152	0.166099	9.11535	meta	MSL
GSE14018	GPL96	GSM352157	NA	NA	NA	NA	NA	NA	NA	NA	1	Liver	NA	NA	8.77737	0.145	0.6532	0.7982	340.806	1792.06	0.607357	0.480153	9.36136	meta	IM
GSE14018	GPL96	GSM352158	NA	NA	NA	NA	NA	NA	NA	NA	1	Lung	NA	NA	8.89537	0.1712	0.6275	0.7987	-194.456	1433.89	0.706028	0.506335	9.19618	meta	SL
GSE14018	GPL96	GSM352161	NA	NA	NA	NA	NA	NA	NA	NA	1	Lung	NA	NA	8.6334	0.1234	0.3228	0.4462	-444.797	612.359	0.808273	0.622017	9.89899	meta	SL
GSE14018	GPL96	GSM352163	NA	NA	NA	NA	NA	NA	NA	NA	1	Bone	NA	NA	8.86503	0.1416	0.3749	0.5166	359.115	448.108	0.749508	0.460023	9.27172	meta	SL
GSE14018	GPL96	GSM352164	NA	NA	NA	NA	NA	NA	NA	NA	1	Lung	NA	NA	8.56536	0.1644	0.634	0.7984	391.219	1513	0.633673	0.404725	9.06572	meta	MSL
GSE14018	GPL96	GSM352165	NA	NA	NA	NA	NA	NA	NA	NA	1	Lung	NA	NA	8.39051	0.1203	0.2261	0.3464	-265.205	412.625	0.81001	0.544323	9.09252	meta	SL
GSE14018	GPL96	GSM352166	NA	NA	NA	NA	NA	NA	NA	NA	1	Lung	NA	NA	9.03946	0.2106	0.761	0.9716	792.786	2400.02	0.476916	0.435878	8.76053	meta	MSL
GSE14018	GPL96	GSM352167	NA	NA	NA	NA	NA	NA	NA	NA	1	Bone	NA	NA	8.77452	0.3134	0.685	0.9984	1647.66	1512.93	0.481066	0.175538	8.47866	meta	MSL
GSE14018	GPL96	GSM352168	NA	NA	NA	NA	NA	NA	NA	NA	1	Lung	NA	NA	8.54308	0.0802	0.7281	0.8083	270.053	1619.38	0.635351	0.581986	9.19698	meta	SL
GSE46141	GPL10379	GSM1124867	NA	NA	NA	0	NA	NA	NA	0	1	Liver	NA	NA	9.14581	0.2252	0.5328	0.758	1097.85	1137.32	0.595358	0.38493	9.22984	meta	LAR
GSE46141	GPL10379	GSM1124869	NA	NA	NA	0	NA	NA	NA	0	1	Breast	NA	NA	8.86452	0.0647	0.4291	0.4938	268.664	1260.03	0.675332	0.556928	9.67776	meta	SL
GSE46141	GPL10379	GSM1124873	NA	NA	NA	0	NA	NA	NA	0	1	Skin	NA	NA	9.04335	0.2096	0.2691	0.4787	426.654	272.968	0.75987	0.390102	9.74008	meta	LAR
GSE46141	GPL10379	GSM1124876	NA	NA	NA	0	NA	NA	NA	0	1	Skin	NA	NA	8.39083	0.0742	1.6925	1.7667	1420.03	3563.9	0.23209	0.209944	7.64261	meta	IM
GSE46141	GPL10379	GSM1124877	NA	NA	NA	0	NA	NA	NA	0	1	Skin	NA	NA	8.77077	0.307	0.5337	0.8407	1172.42	855.797	0.619488	0.429598	8.80156	meta	SL
GSE46141	GPL10379	GSM1124879	NA	NA	NA	0	NA	NA	NA	0	1	Skin	NA	NA	9.09693	0.1736	0.4539	0.6274	1056.51	742.596	0.645533	0.332107	8.99171	meta	SL
GSE46141	GPL10379	GSM1124880	NA	NA	NA	0	NA	NA	NA	0	1	Lymph Node	NA	NA	9.22725	0.1896	0.5699	0.7595	675.183	972.407	0.662358	0.374731	9.34729	meta	SL
GSE46141	GPL10379	GSM1124882	NA	NA	NA	0	NA	NA	NA	0	1	Breast	NA	NA	8.87818	0.123	0.5279	0.6509	827.477	1033.05	0.638621	0.688761	10.3833	meta	SL
GSE46141	GPL10379	GSM1124883	NA	NA	NA	0	NA	NA	NA	0	1	Skin	NA	NA	8.66828	0.212	0.2409	0.453	288.227	-451.2	0.835879	0.458556	8.62583	meta	LAR
GSE46141	GPL10379	GSM1124885	NA	NA	NA	0	NA	NA	NA	0	1	Lymph Node	NA	NA	8.46924	0.1536	0.361	0.5145	-292.394	-139.497	0.85689	0.493741	8.8383	meta	LAR
GSE46141	GPL10379	GSM1124886	NA	NA	NA	0	NA	NA	NA	0	1	Lymph Node	NA	NA	8.864	0.167	0.6285	0.7955	728.32	1808.69	0.559188	0.712985	10.2273	meta	SL
GSE46141	GPL10379	GSM1124888	NA	NA	NA	0	NA	NA	NA	0	1	Bone	NA	NA	8.46683	0.1014	1.3807	1.4821	1155.32	2915.55	0.359986	0.659377	9.76931	meta	IM
GSE46141	GPL10379	GSM1124889	NA	NA	NA	0	NA	NA	NA	0	1	Skin	NA	NA	9.06421	0.1879	0.2023	0.3901	343.954	-310.646	0.819719	0.511802	9.7005	meta	LAR
GSE46141	GPL10379	GSM1124891	NA	NA	NA	0	NA	NA	NA	0	1	Ascite	NA	NA	8.90369	0.1512	1.0687	1.2199	1476.63	2903.09	0.317334	0.121272	7.74147	meta	MSL
GSE46141	GPL10379	GSM1124892	NA	NA	NA	0	NA	NA	NA	0	1	Skin	NA	NA	8.96243	0.1588	0.7177	0.8765	862.74	2056.77	0.511783	0.414324	9.36067	meta	SL
GSE46141	GPL10379	GSM1124893	NA	NA	NA	0	NA	NA	NA	0	1	Skin	NA	NA	8.79167	0.0962	0.1726	0.2689	-509.612	451.206	0.827355	0.624813	9.9713	meta	SL
GSE46141	GPL10379	GSM1124894	NA	NA	NA	0	NA	NA	NA	0	1	Lymph Node	NA	NA	8.59495	0.0685	0.1404	0.2089	-650.135	-339.843	0.896199	0.80105	10.0793	meta	LAR
GSE46141	GPL10379	GSM1124896	NA	NA	NA	0	NA	NA	NA	0	1	Lymph Node	NA	NA	8.15636	0.2282	0.2085	0.4366	146.139	-140.072	0.822003	0.577604	10.2715	meta	SL
GSE46141	GPL10379	GSM1124897	NA	NA	NA	0	NA	NA	NA	0	1	Liver	NA	NA	8.57438	0.1364	0.3218	0.4582	-490.698	45.3944	0.857903	0.511109	9.42384	meta	LAR
GSE46141	GPL10379	GSM1124899	NA	NA	NA	0	NA	NA	NA	0	1	Lymph Node	NA	NA	8.82804	0.2508	0.3211	0.5719	78.1724	451.276	0.77587	0.567623	10.1607	meta	LAR
GSE46141	GPL10379	GSM1124902	NA	NA	NA	0	NA	NA	NA	0	1	Liver	NA	NA	8.86452	0.1678	0.2381	0.4059	100.727	-87.6374	0.821415	0.430581	9.18827	meta	LAR
GSE46141	GPL10379	GSM1124905	NA	NA	NA	0	NA	NA	NA	0	1	Breast	NA	NA	8.89822	0.115	0.3883	0.5033	-135.256	579.071	0.783738	0.526704	9.58887	meta	SL
GSE46141	GPL10379	GSM1124906	NA	NA	NA	0	NA	NA	NA	0	1	Lymph Node	NA	NA	8.79529	0.1733	0.3339	0.5071	283.835	29.8199	0.795461	0.701	10.009	meta	LAR
GSE46141	GPL10379	GSM1124908	NA	NA	NA	0	NA	NA	NA	0	1	Liver	NA	NA	8.60568	0.1462	0.2662	0.4124	-245.86	764.801	0.776842	0.508762	8.79797	meta	LAR
GSE46141	GPL10379	GSM1124909	NA	NA	NA	0	NA	NA	NA	0	1	Skin	NA	NA	9.17065	0.3134	0.2527	0.566	1024.1	838.164	0.638425	0.436146	9.82932	meta	MSL
GSE46141	GPL10379	GSM1124910	NA	NA	NA	0	NA	NA	NA	0	1	Breast	NA	NA	8.68992	0.0836	0.7803	0.8639	166.329	1837.21	0.622327	0.73712	10.3976	meta	IM
GSE46141	GPL10379	GSM1124912	NA	NA	NA	0	NA	NA	NA	0	1	Lymph Node	NA	NA	8.56318	0.1021	0.3183	0.4204	-383.39	699.306	0.79526	0.749487	10.097	meta	SL
GSE46141	GPL10379	GSM1124915	NA	NA	NA	0	NA	NA	NA	0	1	Lymph Node	NA	NA	8.64767	0.1026	0.1995	0.302	-154.83	-562.793	0.877751	0.471834	9.55854	meta	LAR
GSE46141	GPL10379	GSM1124916	NA	NA	NA	0	NA	NA	NA	0	1	Skin	NA	NA	8.89857	0.2164	0.3255	0.5419	862.362	738.715	0.667458	0.52226	9.94204	meta	LAR
GSE46141	GPL10379	GSM1124920	NA	NA	NA	0	NA	NA	NA	0	1	Lymph Node	NA	NA	8.91413	0.1136	1.1349	1.2485	1051.5	2395.08	0.443851	0.51807	9.70207	meta	IM
GSE46141	GPL10379	GSM1124922	NA	NA	NA	0	NA	NA	NA	0	1	Lymph Node	NA	NA	8.60836	0.0956	0.4072	0.5028	-501.002	603.835	0.813831	0.717432	10.009	meta	LAR
GSE46141	GPL10379	GSM1124924	NA	NA	NA	0	NA	NA	NA	0	1	Lymph Node	NA	NA	9.20168	0.1759	0.7822	0.9581	1147.19	1608.62	0.532276	0.401559	9.16086	meta	MSL
GSE46141	GPL10379	GSM1124925	NA	NA	NA	0	NA	NA	NA	0	1	Skin	NA	NA	8.17427	0.0676	0.2395	0.3071	-534.26	-471.974	0.897255	0.564904	9.1283	meta	SL
GSE46141	GPL10379	GSM1124926	NA	NA	NA	0	NA	NA	NA	0	1	Lymph Node	NA	NA	8.46993	0.0594	0.3088	0.3682	-767.052	26.5937	0.879352	0.603682	9.86134	meta	LAR
GSE46141	GPL10379	GSM1124928	NA	NA	NA	0	NA	NA	NA	0	1	Lymph Node	NA	NA	8.87185	0.0601	0.5945	0.6546	275.345	1097.75	0.691999	0.572665	9.95915	meta	SL
GSE46141	GPL10379	GSM1124929	NA	NA	NA	0	NA	NA	NA	0	1	Skin	NA	NA	8.66135	0.0246	0.6276	0.6522	-275.401	1255.58	0.732461	0.622643	9.77051	meta	SL
GSE46141	GPL10379	GSM1124934	NA	NA	NA	0	NA	NA	NA	0	1	Skin	NA	NA	8.95077	0.2323	0.826	1.0583	1592.51	1930.87	0.433721	0.212389	9.41197	meta	MSL
GSE46141	GPL10379	GSM1124935	NA	NA	NA	0	NA	NA	NA	0	1	Lymph Node	NA	NA	8.82896	0.2262	0.324	0.5502	635.542	440.879	0.722771	0.456373	9.62653	meta	LAR
GSE46141	GPL10379	GSM1124936	NA	NA	NA	0	NA	NA	NA	0	1	Lymph Node	NA	NA	8.97571	0.1927	0.9749	1.1675	1262.15	2698.53	0.375029	0.382044	9.52047	meta	SL
GSE46141	GPL10379	GSM1124937	NA	NA	NA	0	NA	NA	NA	0	1	Skin	NA	NA	9.6964	0.3859	0.6803	1.0661	2386.16	968.641	0.455883	0	7.96049	meta	MSL
GSE46141	GPL10379	GSM1124938	NA	NA	NA	0	NA	NA	NA	0	1	Lymph Node	NA	NA	8.92725	0.0662	1.1169	1.1831	361.785	2256.22	0.549292	0.603955	9.71984	meta	IM
GSE46141	GPL10379	GSM1124940	NA	NA	NA	0	NA	NA	NA	0	1	Lymph Node	NA	NA	8.62917	0.1671	0.365	0.5321	-313.665	813.3	0.778623	0.563412	9.69035	meta	SL
GSE46141	GPL10379	GSM1124941	NA	NA	NA	0	NA	NA	NA	0	1	Lymph Node	NA	NA	8.86686	0.1907	0.4129	0.6036	495.981	311.064	0.749525	0.684449	10.1117	meta	LAR
GSE46141	GPL10379	GSM1124942	NA	NA	NA	0	NA	NA	NA	0	1	Lymph Node	NA	NA	8.93507	0.2052	0.6927	0.898	-45.1627	1013.26	0.733668	0.537841	9.32048	meta	LAR
GSE46141	GPL10379	GSM1124943	NA	NA	NA	0	NA	NA	NA	0	1	Lymph Node	NA	NA	8.97546	0.2216	0.8543	1.0759	917.009	2143.69	0.49387	0.494127	9.47732	meta	MSL
GSE46141	GPL10379	GSM1124944	NA	NA	NA	0	NA	NA	NA	0	1	Liver	NA	NA	8.74754	0.11	0.4635	0.5735	247.181	1248.81	0.678864	0.40207	9.35178	meta	LAR
GSE46141	GPL10379	GSM1124947	NA	NA	NA	0	NA	NA	NA	0	1	Liver	NA	NA	8.78302	0.1265	0.3893	0.5158	-319.695	767.409	0.783383	0.592122	9.60144	meta	LAR
GSE46141	GPL10379	GSM1124949	NA	NA	NA	0	NA	NA	NA	0	1	Lymph Node	NA	NA	8.93011	0.1139	0.4758	0.5897	-41.5136	1446.14	0.68865	0.392486	9.19156	meta	SL
GSE46141	GPL10379	GSM1124951	NA	NA	NA	0	NA	NA	NA	0	1	Liver	NA	NA	8.45829	0.0345	1.206	1.2405	335.119	3250.22	0.425508	0.537158	9.0139	meta	IM
GSE46141	GPL10379	GSM1124954	NA	NA	NA	0	NA	NA	NA	0	1	Lymph Node	NA	NA	8.28284	0.0824	0.8371	0.9195	1607.87	2679.92	0.330101	0.211193	7.46092	meta	MSL
GSE46141	GPL10379	GSM1124955	NA	NA	NA	0	NA	NA	NA	0	1	Lymph Node	NA	NA	8.72716	0.1026	0.1937	0.2963	193.932	71.2425	0.799754	0.294588	9.18737	meta	SL
GSE46141	GPL10379	GSM1124957	NA	NA	NA	0	NA	NA	NA	0	1	Liver	NA	NA	7.82245	0.0022	1.6385	1.6407	565.381	3671.91	0.33709	0.416147	7.27879	meta	IM
GSE46928	GPL96	GSM1141273	NA	NA	NA	NA	NA	NA	NA	NA	1	Breast	NA	NA	8.39975	0.0366	0.3429	0.3795	-392.783	595.48	0.805225	0.685733	9.86659	meta	LAR
GSE46928	GPL96	GSM1141276	NA	NA	NA	NA	NA	NA	NA	NA	1	Breast	NA	NA	8.74181	0.1296	0.8829	1.0125	831.525	1869.24	0.5391	0.458033	9.44796	meta	IM
GSE46928	GPL96	GSM1141283	NA	NA	NA	NA	NA	NA	NA	NA	1	Breast	NA	NA	8.77049	0.3824	0.8585	1.2409	1701.43	2165.34	0.387771	0.342002	8.24578	meta	MSL
GSE46928	GPL96	GSM1141310	NA	NA	NA	NA	NA	NA	NA	NA	1	Breast	NA	NA	8.69488	0.126	1.0454	1.1715	609.675	2641.04	0.469427	0.646467	9.53897	meta	IM
GSE46928	GPL96	GSM1141313	NA	NA	NA	NA	NA	NA	NA	NA	1	Breast	NA	NA	9.25707	0.1539	0.7513	0.9052	1120.38	1998.17	0.486467	0.370781	9.33311	meta	MSL
GSE46928	GPL96	GSM1141315	NA	NA	NA	NA	NA	NA	NA	NA	1	Breast	NA	NA	8.62752	0.0408	0.4333	0.474	-236.365	751.485	0.777195	0.594978	9.69323	meta	LAR
GSE5327	GPL96	GSM120655	Negative	NA	NA	NA	NA	NA	10.0984	NA	1	NA	NA	NA	8.6123	0.1722	0.452	0.6242	153.959	729.278	0.742075	0.65976	9.69342	meta	SL
GSE5327	GPL96	GSM120656	Negative	NA	NA	NA	NA	NA	22.4918	NA	1	NA	NA	NA	8.76355	0.0638	0.7545	0.8183	528.88	1604.5	0.607297	0.548704	9.73846	meta	SL
GSE5327	GPL96	GSM120663	Negative	NA	NA	NA	NA	NA	43.9508	NA	1	NA	NA	NA	9.03207	0.0775	0.8453	0.9228	1313.77	2499.77	0.394961	0.376791	8.79555	meta	MSL
GSE5327	GPL96	GSM120668	Negative	NA	NA	NA	NA	NA	7.18033	NA	1	NA	NA	NA	8.6087	0.0836	0.6275	0.7111	-258.241	1103.33	0.745817	0.691961	9.9551	meta	SL
GSE5327	GPL96	GSM120671	Negative	NA	NA	NA	NA	NA	26.6393	NA	1	NA	NA	NA	8.3007	0.0842	0.3659	0.4502	-461.735	269.151	0.838257	0.735059	9.7839	meta	SL
GSE5327	GPL96	GSM120679	Negative	NA	NA	NA	NA	NA	41.6393	NA	1	NA	NA	NA	8.76948	0.1739	0.4755	0.6494	168.637	515.094	0.761384	0.485765	9.29012	meta	SL
GSE5327	GPL96	GSM120687	Negative	NA	NA	NA	NA	NA	9.18033	NA	1	NA	NA	NA	8.60032	0.1474	0.4153	0.5626	183.745	827.829	0.729316	0.651985	10.0748	meta	SL
GSE5327	GPL96	GSM120702	Negative	NA	NA	NA	NA	NA	4.36066	NA	1	NA	NA	NA	8.49	0.1832	0.4074	0.5906	119.609	730.807	0.745295	0.519753	9.91368	meta	SL
GSE5327	GPL96	GSM120707	Negative	NA	NA	NA	NA	NA	21.6066	NA	1	NA	NA	NA	8.75633	0.157	0.5133	0.6704	12.0183	278.827	0.797486	0.503777	9.16129	meta	LAR
GSE54323	GPL570	GSM1312928	NA	NA	Negative	NA	NA	NA	NA	NA	1	Liver	NA	NA	8.99093	0.1168	0.6337	0.7505	354.573	1701.32	0.616294	0.501606	9.69487	meta	LAR
GSE54323	GPL570	GSM1312929	NA	NA	Negative	NA	NA	NA	NA	NA	1	Liver	NA	NA	8.91381	0.2613	0.7782	1.0395	1449.32	1928.18	0.452914	0.276305	8.41142	meta	MSL
GSE54323	GPL570	GSM1312932	NA	NA	Negative	NA	NA	NA	NA	NA	1	Bone	NA	NA	8.52522	0.0892	0.4865	0.5756	-42.6438	972.794	0.737441	0.574723	9.77915	meta	LAR
GSE54323	GPL570	GSM1312933	NA	NA	Negative	NA	NA	NA	NA	NA	1	Bone	NA	NA	8.5829	0.0876	0.4497	0.5373	-140.671	1225.22	0.721946	0.521831	9.82193	meta	LAR
GSE54323	GPL570	GSM1312935	NA	NA	Negative	NA	NA	NA	NA	NA	1	Lymph Node	NA	NA	8.07903	0.169	1.0821	1.2511	454.992	2090.98	0.558096	0.695929	8.09054	meta	IM
GSE54323	GPL570	GSM1312937	NA	NA	Negative	NA	NA	NA	NA	NA	1	Lymph Node	NA	NA	8.81908	0.3386	0.7289	1.0675	1627.4	2612.52	0.336726	0.1791	8.35555	meta	MSL
GSE54323	GPL570	GSM1312938	NA	NA	Negative	NA	NA	NA	NA	NA	1	Bone	NA	NA	8.65133	0.0641	0.4647	0.5288	218.43	1841.42	0.615837	0.335684	9.01173	meta	LAR
GSE54323	GPL570	GSM1312939	NA	NA	Negative	NA	NA	NA	NA	NA	1	Bone	NA	NA	8.59708	0.0302	0.8156	0.8458	603.962	2655.8	0.468254	0.224774	8.26455	meta	IM
GSE54323	GPL570	GSM1312940	NA	NA	Negative	NA	NA	NA	NA	NA	1	Liver	NA	NA	8.91736	0.1626	0.3979	0.5604	64.7232	584.49	0.764659	0.621483	9.91383	meta	LAR
GSE54323	GPL570	GSM1312941	NA	NA	Negative	NA	NA	NA	NA	NA	1	Liver	NA	NA	8.64524	0.2314	0.9313	1.1628	1246.68	1925.61	0.479561	0.299995	8.05665	meta	MSL
GSE54323	GPL570	GSM1312942	NA	NA	Negative	NA	NA	NA	NA	NA	1	Liver	NA	NA	8.70681	0.1572	0.1528	0.31	-303.6	-734.571	0.899315	0.534895	9.98071	meta	LAR
GSE54323	GPL570	GSM1312943	NA	NA	Negative	NA	NA	NA	NA	NA	1	Liver	NA	NA	8.64965	0.0702	0.3043	0.3745	-570.543	-195.641	0.881144	0.471412	9.21873	meta	LAR
GSE54323	GPL570	GSM1312944	NA	NA	Negative	NA	NA	NA	NA	NA	1	Bone	NA	NA	9.08604	0.1864	0.4159	0.6023	914.722	957.294	0.637323	0.427822	9.78327	meta	MSL
GSE54323	GPL570	GSM1312945	NA	NA	Negative	NA	NA	NA	NA	NA	1	Bone	NA	NA	8.52294	0.0477	0.9252	0.9728	444.387	2596.12	0.496444	0.386182	8.49959	meta	IM
GSE54323	GPL570	GSM1312946	NA	NA	Negative	NA	NA	NA	NA	NA	1	Bone	NA	NA	9.13825	0.1262	0.4343	0.5606	389.142	1104.41	0.679128	0.600632	10.1112	meta	SL
GSE54323	GPL570	GSM1312947	NA	NA	Negative	NA	NA	NA	NA	NA	1	Bone	NA	NA	9.13773	0.0808	0.7601	0.841	669.728	2160.07	0.523052	0.499822	9.62489	meta	SL
GSE54323	GPL570	GSM1312948	NA	NA	Negative	NA	NA	NA	NA	NA	1	Bone	NA	NA	8.87277	0.0636	0.5629	0.6266	449.505	1539.96	0.623944	0.366655	9.13189	meta	LAR
GSE54323	GPL570	GSM1312949	NA	NA	Negative	NA	NA	NA	NA	NA	1	Bone	NA	NA	8.6443	0.0771	0.6588	0.7359	99.0162	2073.17	0.602762	0.324426	8.59544	meta	LAR
GSE54323	GPL570	GSM1312951	NA	NA	Negative	NA	NA	NA	NA	NA	1	Lymph Node	NA	NA	9.00298	0.1851	0.1703	0.3554	-151.269	-291.39	0.857704	0.388778	8.85696	meta	SL
GSE54323	GPL570	GSM1312955	NA	NA	Negative	NA	NA	NA	NA	NA	1	Bone	NA	NA	8.81882	0.1284	0.4077	0.5361	57.3865	762.555	0.748271	0.523511	9.67098	meta	LAR
GSE54323	GPL570	GSM1312956	NA	NA	Negative	NA	NA	NA	NA	NA	1	Bone	NA	NA	8.44724	0.0662	1.034	1.1002	490.016	2321.98	0.525277	0.625771	10.1059	meta	IM
GSE56493	GPL10379	GSM1362519	NA	NA	NA	NA	NA	NA	NA	NA	1	Skin	NA	NA	9.08765	0.1803	0.2949	0.4752	1041.79	726.99	0.648927	0.408006	9.95787	meta	SL
GSE56493	GPL10379	GSM1362521	NA	NA	NA	NA	NA	NA	NA	NA	1	Skin	NA	NA	8.89057	0.2223	0.7754	0.9977	1457.18	1786.54	0.470333	0.243725	9.50494	meta	MSL
GSE56493	GPL10379	GSM1362522	NA	NA	NA	1	NA	NA	NA	NA	1	Lymph Node	NA	NA	8.7973	0.2087	0.2936	0.5023	519.294	298.058	0.748523	0.487113	9.71543	meta	LAR
GSE56493	GPL10379	GSM1362523	NA	NA	NA	1	NA	NA	NA	NA	1	Lymph Node	NA	NA	8.92328	0.1786	0.8836	1.0622	1090.93	2533.56	0.4203	0.414411	9.62118	meta	SL
GSE56493	GPL10379	GSM1362524	NA	NA	NA	NA	NA	NA	NA	NA	1	Skin	NA	NA	9.61095	0.364	0.6241	0.9881	2225.13	826.994	0.494963	0.0377414	8.20742	meta	MSL
GSE56493	GPL10379	GSM1362525	NA	NA	NA	1	NA	NA	NA	NA	1	Lymph Node	NA	NA	8.89941	0.0564	1.0725	1.1289	251.792	2108.47	0.580506	0.631983	9.79201	meta	IM
GSE56493	GPL10379	GSM1362527	NA	NA	NA	1	NA	NA	NA	NA	1	Lymph Node	NA	NA	8.61095	0.1624	0.3241	0.4865	-374.104	647.414	0.799036	0.585524	9.766	meta	SL
GSE56493	GPL10379	GSM1362528	NA	NA	NA	1	NA	NA	NA	NA	1	Lymph Node	NA	NA	8.765	0.1681	0.3158	0.4839	188.021	-104.5	0.815475	0.725403	10.0588	meta	LAR
GSE56493	GPL10379	GSM1362529	NA	NA	NA	1	NA	NA	NA	NA	1	Lymph Node	NA	NA	8.90579	0.1909	0.6453	0.8362	-130.704	844.976	0.75847	0.567074	9.436	meta	LAR
GSE56493	GPL10379	GSM1362531	NA	NA	NA	1	NA	NA	NA	NA	1	Lymph Node	NA	NA	8.93382	0.1987	0.8038	1.0025	773.803	1981.64	0.532322	0.525326	9.57793	meta	LAR
GSE56493	GPL10379	GSM1362533	NA	NA	NA	NA	NA	NA	NA	NA	1	Liver	NA	NA	8.72453	0.1148	0.4202	0.535	151.057	1088.53	0.706012	0.434311	9.4654	meta	LAR
GSE56493	GPL10379	GSM1362535	NA	NA	NA	NA	NA	NA	NA	NA	1	Liver	NA	NA	8.59218	0.0442	0.646	0.6902	-654.216	1473.82	0.748303	0.500292	8.86844	meta	LAR
GSE56493	GPL10379	GSM1362538	NA	NA	NA	1	NA	NA	NA	NA	1	Lymph Node	NA	NA	8.62997	0.1614	0.1797	0.3411	91.6717	-297.157	0.839288	0.274503	8.09061	meta	LAR
GSE56493	GPL10379	GSM1362539	NA	NA	NA	NA	NA	NA	NA	NA	1	Liver	NA	NA	8.76113	0.1258	0.3581	0.4838	-417.775	606.389	0.806449	0.620054	9.69748	meta	LAR
GSE56493	GPL10379	GSM1362541	NA	NA	NA	1	NA	NA	NA	NA	1	Lymph Node	NA	NA	8.90584	0.1032	0.4337	0.5369	-126.862	1284.86	0.714443	0.422792	9.31981	meta	SL
GSE56493	GPL10379	GSM1362542	NA	NA	NA	NA	NA	NA	NA	NA	1	Skin	NA	NA	9.31979	0.2669	0.385	0.6519	1404.86	389.329	0.646084	0.20205	8.27111	meta	MSL
GSE56493	GPL10379	GSM1362544	NA	NA	NA	NA	NA	NA	NA	NA	1	Liver	NA	NA	8.44292	0.0308	1.1159	1.1468	234.847	3112.81	0.456815	0.56963	9.1528	meta	IM
GSE56493	GPL10379	GSM1362547	NA	NA	NA	1	NA	NA	NA	NA	1	Lymph Node	NA	NA	8.23173	0.0548	0.7732	0.828	1494.65	2564.55	0.361584	0.255025	7.74984	meta	IM
GSE56493	GPL10379	GSM1362548	NA	NA	NA	1	NA	NA	NA	NA	1	Lymph Node	NA	NA	8.69353	0.0928	0.1789	0.2717	95.7473	-55.8227	0.819162	0.324496	9.31606	meta	SL
GSE56493	GPL10379	GSM1362551	NA	NA	NA	NA	NA	NA	NA	NA	1	Liver	NA	NA	8.36736	0.2313	0.4163	0.6476	811.97	853.563	0.660383	0.321547	7.50954	meta	MSL
GSE56493	GPL10379	GSM1362552	NA	NA	NA	1	NA	NA	NA	NA	1	Lymph Node	NA	NA	8.46342	0.0576	0.2879	0.3455	-802.243	-101.301	0.890498	0.622216	9.92968	meta	LAR
GSE56493	GPL10379	GSM1362553	NA	NA	NA	1	NA	NA	NA	NA	1	Lymph Node	NA	NA	8.73721	0.1242	0.4043	0.5284	-243.144	165.202	0.828963	0.636992	9.93137	meta	LAR
GSE56493	GPL10379	GSM1362554	NA	NA	NA	NA	NA	NA	NA	NA	1	Liver	NA	NA	9.10642	0.204	0.4907	0.6948	943.077	995.388	0.629776	0.418443	9.35311	meta	LAR
GSE56493	GPL10379	GSM1362557	NA	NA	NA	1	NA	NA	NA	NA	1	Lymph Node	NA	NA	8.67453	0.1522	0.2611	0.4132	-6.99006	-162.387	0.836394	0.622164	10.2671	meta	LAR
GSE56493	GPL10379	GSM1362558	NA	NA	NA	NA	NA	NA	NA	NA	1	Breast	NA	NA	8.83761	0.0595	0.387	0.4465	204.811	1108.78	0.698278	0.580852	9.76489	meta	SL
GSE56493	GPL10379	GSM1362561	NA	NA	NA	NA	NA	NA	NA	NA	1	Liver	NA	NA	8.32586	0.0635	0.5288	0.5923	-514.88	935.246	0.785872	0.468889	9.2222	meta	LAR
GSE56493	GPL10379	GSM1362562	NA	NA	NA	NA	NA	NA	NA	NA	1	Liver	NA	NA	8.80583	0.1304	0.7051	0.8356	552.953	1720	0.590894	0.268708	7.60754	meta	MSL
GSE56493	GPL10379	GSM1362564	NA	NA	NA	NA	NA	NA	NA	NA	1	Breast	NA	NA	8.88515	0.2807	1.2258	1.5065	2071.7	2742.13	0.256303	0.296376	8.51952	meta	MSL
GSE56493	GPL10379	GSM1362565	NA	NA	NA	NA	NA	NA	NA	NA	1	Skin	NA	NA	9.01384	0.1941	0.2387	0.4328	310.757	116.565	0.78524	0.420223	9.81906	meta	LAR
GSE56493	GPL10379	GSM1362566	NA	NA	NA	NA	NA	NA	NA	NA	1	Skin	NA	NA	8.71055	0.1607	0.195	0.3557	-78.3763	-166.456	0.842414	0.714245	10.1308	meta	SL
GSE56493	GPL10379	GSM1362569	NA	NA	NA	NA	NA	NA	NA	NA	1	Skin	NA	NA	8.34353	0.0674	1.606	1.6734	1280.51	3453.72	0.267579	0.246555	7.90476	meta	IM
GSE56493	GPL10379	GSM1362570	NA	NA	NA	NA	NA	NA	NA	NA	1	Skin	NA	NA	8.72438	0.2888	0.4983	0.787	1024.99	705.114	0.653235	0.465258	8.95944	meta	SL
GSE56493	GPL10379	GSM1362573	NA	NA	NA	NA	NA	NA	NA	NA	1	Skin	NA	NA	9.04382	0.1647	0.4168	0.5815	896.807	577.271	0.681223	0.368096	9.14196	meta	SL
GSE56493	GPL10379	GSM1362574	NA	NA	NA	1	NA	NA	NA	NA	1	Lymph Node	NA	NA	8.41131	0.0849	1.3189	1.4038	1008.31	2777.57	0.398689	0.689554	9.83877	meta	IM
GSE56493	GPL10379	GSM1362575	NA	NA	NA	1	NA	NA	NA	NA	1	Lymph Node	NA	NA	9.19151	0.1752	0.5357	0.7109	526.247	819.8	0.69486	0.406167	9.46807	meta	SL
GSE56493	GPL10379	GSM1362577	NA	NA	NA	NA	NA	NA	NA	NA	1	Skin	NA	NA	8.82335	0.1167	0.4294	0.5461	638.11	761.689	0.689164	0.711369	10.4064	meta	SL
GSE56493	GPL10379	GSM1362578	NA	NA	NA	NA	NA	NA	NA	NA	1	Breast	NA	NA	8.65008	0.1977	0.2614	0.4591	210.487	-500.009	0.84593	0.494316	8.8158	meta	LAR
GSE56493	GPL10379	GSM1362580	NA	NA	NA	1	NA	NA	NA	NA	1	Lymph Node	NA	NA	8.44891	0.1446	0.3215	0.4661	-367.975	-271.656	0.872209	0.523738	9.00462	meta	LAR
GSE56493	GPL10379	GSM1362581	NA	NA	NA	1	NA	NA	NA	NA	1	Lymph Node	NA	NA	8.82939	0.1471	0.5873	0.7344	631.282	1658.93	0.588848	0.738609	10.2554	meta	SL
GSE56493	GPL10379	GSM1362583	NA	NA	NA	NA	NA	NA	NA	NA	1	Skin	NA	NA	9.65442	0.4318	0.5151	0.9468	2210.72	852.299	0.493573	0.0332679	8.34478	meta	MSL
GSE56493	GPL10379	GSM1362584	NA	NA	NA	NA	NA	NA	NA	NA	1	Liver	NA	NA	8.81028	0.157	0.9736	1.1306	1145.6	2471.15	0.421331	0.20885	8.74783	meta	MSL
GSE56493	GPL10379	GSM1362585	NA	NA	NA	NA	NA	NA	NA	NA	1	Skin	NA	NA	9.03056	0.1765	0.1926	0.3691	212.408	-433.348	0.840519	0.544109	9.78853	meta	LAR
GSE56493	GPL10379	GSM1362589	NA	NA	NA	NA	NA	NA	NA	NA	1	Other	NA	NA	8.85088	0.1329	0.9929	1.1258	1364.38	2765.53	0.351888	0.15071	8.00959	meta	MSL
GSE56493	GPL10379	GSM1362590	NA	NA	NA	NA	NA	NA	NA	NA	1	Skin	NA	NA	8.92684	0.153	0.6418	0.7948	752.542	1901.23	0.544897	0.443667	9.47749	meta	SL
GSE56493	GPL10379	GSM1362591	NA	NA	NA	NA	NA	NA	NA	NA	1	Skin	NA	NA	8.76331	0.0919	0.1293	0.2212	-557.098	286.894	0.844415	0.653357	10.0212	meta	SL
GSE56493	GPL10379	GSM1362592	NA	NA	NA	1	NA	NA	NA	NA	1	Lymph Node	NA	NA	8.72081	0.0576	1.3118	1.3694	1001.27	2632.96	0.419003	0.566548	9.82251	meta	IM
GSE56493	GPL10379	GSM1362593	NA	NA	NA	NA	NA	NA	NA	NA	1	Breast	NA	NA	8.82581	0.0946	0.7858	0.8804	407.44	2253.54	0.544009	0.541773	9.39525	meta	IM
GSE56493	GPL10379	GSM1362595	NA	NA	NA	1	NA	NA	NA	NA	1	Lymph Node	NA	NA	8.11204	0.2172	0.1919	0.409	36.4811	-294.056	0.84342	0.603273	10.2957	meta	SL
GSE56493	GPL10379	GSM1362596	NA	NA	NA	NA	NA	NA	NA	NA	1	Liver	NA	NA	8.57124	0.1303	0.2909	0.4212	-539.823	-107.888	0.872788	0.536279	9.52233	meta	LAR
GSE56493	GPL10379	GSM1362597	NA	NA	NA	NA	NA	NA	NA	NA	1	Breast	NA	NA	8.97992	0.2792	1.0468	1.326	1424.07	3034.08	0.306396	0.263077	8.42159	meta	MSL
GSE56493	GPL10379	GSM1362601	NA	NA	NA	1	NA	NA	NA	NA	1	Lymph Node	NA	NA	8.47991	0.0564	1.2862	1.3426	657.045	2570.91	0.472374	0.688801	9.96334	meta	IM
GSE56493	GPL10379	GSM1362603	NA	NA	NA	NA	NA	NA	NA	NA	1	Breast	NA	NA	8.96334	0.0489	0.5941	0.643	-25.5551	973.199	0.735704	0.536912	9.53193	meta	LAR
GSE56493	GPL10379	GSM1362606	NA	NA	NA	NA	NA	NA	NA	NA	1	Skin	NA	NA	9.23891	0.3798	0.9408	1.3205	2348.46	2529.34	0.247215	0.040866	7.89794	meta	MSL
GSE56493	GPL10379	GSM1362607	NA	NA	NA	NA	NA	NA	NA	NA	1	Breast	NA	NA	8.88203	0.1074	0.3571	0.4645	-216.04	426.88	0.804516	0.556202	9.67717	meta	SL
GSE56493	GPL10379	GSM1362608	NA	NA	NA	1	NA	NA	NA	NA	1	Lymph Node	NA	NA	8.82964	0.1816	0.3855	0.5671	388.525	169.237	0.773241	0.70905	10.1519	meta	LAR
GSE56493	GPL10379	GSM1362610	NA	NA	NA	NA	NA	NA	NA	NA	1	Liver	NA	NA	8.5837	0.1274	0.224	0.3514	-336.404	595.06	0.800328	0.545914	8.97011	meta	LAR
GSE56493	GPL10379	GSM1362611	NA	NA	NA	NA	NA	NA	NA	NA	1	Skin	NA	NA	9.12051	0.2854	0.2056	0.491	844.898	661.404	0.677752	0.466055	9.89499	meta	MSL
GSE56493	GPL10379	GSM1362612	NA	NA	NA	NA	NA	NA	NA	NA	1	Breast	NA	NA	8.66555	0.0774	0.7279	0.8054	84.6397	1660.03	0.651615	0.757733	10.4123	meta	SL
GSE56493	GPL10379	GSM1362613	NA	NA	NA	1	NA	NA	NA	NA	1	Lymph Node	NA	NA	8.544	0.0914	0.2839	0.3754	-440.879	540.815	0.814078	0.770135	10.1475	meta	SL
GSE56493	GPL10379	GSM1362615	NA	NA	NA	1	NA	NA	NA	NA	1	Lymph Node	NA	NA	9.20174	0.0926	0.5972	0.6899	455.935	1686.59	0.606229	0.438227	9.77521	meta	SL
GSE56493	GPL10379	GSM1362617	NA	NA	NA	1	NA	NA	NA	NA	1	Lymph Node	NA	NA	8.62673	0.0954	0.1894	0.2848	-229.187	-682.959	0.891072	0.499815	9.65717	meta	LAR
GSE56493	GPL10379	GSM1362618	NA	NA	NA	NA	NA	NA	NA	NA	1	Skin	NA	NA	8.85862	0.2038	0.2825	0.4864	716.008	580.764	0.700043	0.54863	9.99904	meta	LAR
GSE56493	GPL10379	GSM1362622	NA	NA	NA	1	NA	NA	NA	NA	1	Lymph Node	NA	NA	8.86575	0.0983	1.0802	1.1785	905.234	2241.23	0.482883	0.549851	9.779	meta	IM
GSE56493	GPL10379	GSM1362623	NA	NA	NA	1	NA	NA	NA	NA	1	Lymph Node	NA	NA	8.96988	0.118	0.9385	1.0566	972.392	2227.84	0.475957	0.558869	9.74287	meta	SL
GSE56493	GPL10379	GSM1362625	NA	NA	NA	1	NA	NA	NA	NA	1	Lymph Node	NA	NA	8.58961	0.0948	0.3644	0.4592	-552.828	446.528	0.831283	0.735981	10.0587	meta	LAR
GSE56493	GPL10379	GSM1362626	NA	NA	NA	NA	NA	NA	NA	NA	1	Breast	NA	NA	9.16384	0.1622	0.7695	0.9318	1054.25	1553.97	0.550491	0.436345	9.29305	meta	MSL
GSE56493	GPL10379	GSM1362627	NA	NA	NA	NA	NA	NA	NA	NA	1	Skin	NA	NA	8.15421	0.0696	0.223	0.2926	-577.233	-592.546	0.907595	0.589897	9.26612	meta	SL
GSE56493	GPL10379	GSM1362628	NA	NA	NA	NA	NA	NA	NA	NA	1	Skin	NA	NA	8.80477	0.2339	0.2822	0.5161	-8.0433	294.989	0.797831	0.589776	10.192	meta	LAR
GSE56493	GPL10379	GSM1362629	NA	NA	NA	NA	NA	NA	NA	NA	1	Breast	NA	NA	8.71559	0.3144	0.4624	0.7768	1397.64	1368.35	0.531011	0.156645	7.38395	meta	MSL
GSE56493	GPL10379	GSM1362630	NA	NA	NA	NA	NA	NA	NA	NA	1	Liver	NA	NA	9.32449	0.2886	0.5099	0.7985	1417.89	889.655	0.58679	0.285212	9.03368	meta	MSL
GSE56493	GPL10379	GSM1362632	NA	NA	NA	NA	NA	NA	NA	NA	1	Breast	NA	NA	8.29704	0.0096	1.4435	1.4531	282.659	3423.63	0.409375	0.510588	8.80482	meta	IM
GSE56493	GPL10379	GSM1362633	NA	NA	NA	1	NA	NA	NA	NA	1	Lymph Node	NA	NA	8.84342	0.0543	0.5489	0.6032	182.26	942.663	0.717832	0.597738	10.014	meta	SL
GSE56493	GPL10379	GSM1362634	NA	NA	NA	NA	NA	NA	NA	NA	1	Skin	NA	NA	8.64362	0.0241	0.576	0.6001	-334.883	1086.81	0.754857	0.644987	9.84422	meta	SL
GSE56493	GPL10379	GSM1362635	NA	NA	NA	NA	NA	NA	NA	NA	1	Liver	NA	NA	8.90644	0.0621	0.4281	0.4902	33.4843	1340.65	0.691889	0.589342	10.0023	meta	LAR
GSE76124	GPL570	GSM1974651	Negative	Negative	Negative	NA	NA	NA	NA	NA	1	NA	69	2	8.3742	0.0592	0.4643	0.5234	-256.848	-9.79318	0.844135	0.407819	8.70987	meta	SL
GSE103091	GPL570	GSM1419947	Negative	Negative	Negative	NA	NA	69.3667	69.3667	0	0	Breast	36.9802	NA	8.80549	600.529	1968.18	0.555323	0.0782	0.6639	0.742	0.50038	9.5657	primary	IM
GSE103091	GPL570	GSM1419949	Negative	Negative	Negative	NA	NA	102.333	102.333	0	0	Breast	68.1889	NA	8.73131	1273.58	3484.63	0.264186	0.0616	1.3731	1.4346	0.373272	8.43893	primary	IM
GSE103091	GPL570	GSM1419952	Negative	Negative	Negative	NA	NA	166.533	166.533	0	0	Breast	62.0315	NA	8.39537	-245.484	827.849	0.770946	0.073	0.4093	0.4823	0.636803	9.62178	primary	SL
GSE103091	GPL570	GSM1419956	Negative	Negative	Negative	NA	NA	36.0333	36.0333	1	0	Breast	73.1581	NA	9.00475	923.445	1340.72	0.591934	0.1094	0.6078	0.7173	0.403125	9.03304	primary	LAR
GSE103091	GPL570	GSM1419957	Negative	Negative	Negative	NA	NA	164.633	164.633	0	0	Breast	43.0418	NA	8.95782	914.916	1629.17	0.558326	0.09	0.6141	0.7042	0.331897	9.1024	primary	SL
GSE103091	GPL570	GSM1419958	Negative	Negative	Negative	NA	NA	159.433	159.433	0	0	Breast	49.8398	NA	9.22249	864.007	1535.11	0.575852	0.1816	0.6021	0.7838	0.350871	9.28051	primary	SL
GSE103091	GPL570	GSM1419968	Negative	Negative	Negative	NA	NA	160.8	160.8	0	0	Breast	54.0561	NA	8.65449	-140.068	1677.8	0.674353	0.0737	0.5186	0.5923	0.648777	9.70862	primary	SL
GSE103091	GPL570	GSM1419972	Negative	Negative	Negative	NA	NA	152.4	152.4	0	0	Breast	40.6188	NA	8.64994	43.7224	1098.79	0.716032	0.045	0.4417	0.4867	0.667845	9.95603	primary	SL
GSE103091	GPL570	GSM1419975	Negative	Negative	Negative	NA	NA	142.333	142.333	0	0	Breast	53.1718	NA	8.82597	363.243	1477.14	0.640894	0.1478	0.5198	0.6676	0.452274	9.60087	primary	SL
GSE103091	GPL570	GSM1419977	Negative	Negative	Negative	NA	NA	67.8	67.8	0	0	Breast	29.6016	NA	8.80445	139.019	186.04	0.794446	0.1605	0.2651	0.4256	0.40999	9.2672	primary	SL
GSE103091	GPL570	GSM1419978	Negative	Negative	Negative	NA	NA	86.4333	86.4333	0	0	Breast	61.3306	NA	8.3424	-649.185	157.515	0.86138	0.0638	0.2936	0.3574	0.821612	10.1153	primary	SL
GSE103091	GPL570	GSM1419981	Negative	Negative	Negative	NA	NA	138.233	138.233	0	0	Breast	54.5708	NA	9.00578	264.045	505.263	0.75318	0.0438	0.2832	0.327	0.519357	9.94487	primary	LAR
GSE103091	GPL570	GSM1419986	Negative	Negative	Negative	NA	NA	116.4	116.4	0	0	Breast	43.2526	NA	8.51297	527.831	1954.83	0.565783	0.0922	0.7445	0.8368	0.781629	9.99007	primary	IM
GSE103091	GPL570	GSM1419987	Negative	Negative	Negative	NA	NA	120.933	120.933	0	0	Breast	62.2341	NA	8.87137	664.938	955.476	0.665341	0.1443	0.4154	0.5597	0.455337	9.41349	primary	SL
GSE103091	GPL570	GSM1419988	Negative	Negative	Negative	NA	NA	115.767	115.767	0	0	Breast	38.8556	NA	8.35818	-537.837	716.538	0.807309	0.1041	0.4352	0.5393	0.81152	9.99799	primary	LAR
GSE103091	GPL570	GSM1419989	Negative	Negative	Negative	NA	NA	2.16667	2.16667	0	0	Breast	50.9569	NA	9.18773	1321.59	910.745	0.595693	0.4064	0.3711	0.7774	0.10401	7.85993	primary	MSL
GSE103091	GPL570	GSM1419990	Negative	Negative	Negative	NA	NA	107.367	107.367	0	0	Breast	42.0288	NA	8.66303	-32.336	1075.36	0.72615	0.1257	0.5316	0.6573	0.61076	9.85847	primary	SL
GSE103091	GPL570	GSM1419992	Negative	Negative	Negative	NA	NA	100.033	100.033	0	0	Breast	57.3415	NA	8.8818	1058.86	1646.83	0.53849	0.1884	0.6223	0.8107	0.415097	9.74576	primary	SL
GSE103091	GPL570	GSM1419993	Negative	Negative	Negative	NA	NA	70.8333	70.8333	0	0	Breast	57.7166	NA	8.87883	1166.01	2795.71	0.374887	0.1561	1.0513	1.2074	0.546262	9.48272	primary	IM
GSE103091	GPL570	GSM1419994	Negative	Negative	Negative	NA	NA	5.43333	5.43333	1	0	Breast	76.9938	NA	9.19422	1480.67	1649.58	0.484966	0.4344	0.5195	0.9539	0.0813437	8.04962	primary	MSL
GSE103091	GPL570	GSM1419996	Negative	Negative	Negative	NA	NA	96.2333	96.2333	0	0	Breast	40.9692	NA	8.44624	-882.153	367.784	0.863068	0.0682	0.274	0.3422	0.84597	9.81392	primary	SL
GSE103091	GPL570	GSM1419998	Negative	Negative	Negative	NA	NA	0.666667	0.666667	0	0	Breast	80.219	NA	8.82645	138.248	110.939	0.80116	0.2208	0.243	0.4638	0.411464	9.6078	primary	SL
GSE103091	GPL570	GSM1420000	Negative	Negative	Negative	NA	NA	89.0667	89.0667	0	0	Breast	55.9644	NA	8.51276	950.693	3466.24	0.31215	0.0437	1.3492	1.3929	0.476416	8.84703	primary	IM
GSE103091	GPL570	GSM1420001	Negative	Negative	Negative	NA	NA	85.6333	85.6333	0	0	Breast	65.5031	NA	8.69194	745.275	2153.11	0.514444	0.0892	0.7091	0.7983	0.440005	9.19628	primary	IM
GSE103091	GPL570	GSM1420003	Negative	Negative	Negative	NA	NA	69.5333	69.5333	0	0	Breast	49.1472	NA	9.37346	603.656	474.998	0.722544	0.0748	0.2299	0.3047	0.255419	9.20061	primary	LAR
GSE103091	GPL570	GSM1420004	Negative	Negative	Negative	NA	NA	84.2333	84.2333	0	0	Breast	56.1095	NA	8.7257	1109.06	2957.26	0.360608	0.1017	1.066	1.1678	0.460519	9.19854	primary	IM
GSE103091	GPL570	GSM1420005	Negative	Negative	Negative	NA	NA	27.0333	27.0333	1	0	Breast	82.6694	NA	8.37234	-292.614	259.886	0.825232	0.127	0.2117	0.3388	0.663758	9.71755	primary	SL
GSE103091	GPL570	GSM1420008	Negative	Negative	Negative	NA	NA	80.6	80.6	0	0	Breast	57.3306	NA	8.13173	-367.253	502.555	0.811052	0.1292	0.1779	0.3072	0.504456	9.75746	primary	SL
GSE103091	GPL570	GSM1420009	Negative	Negative	Negative	NA	NA	65	65	0	0	Breast	54.5024	NA	8.90228	885.344	2769.61	0.416238	0.0805	0.9621	1.0425	0.552248	9.51795	primary	IM
GSE103091	GPL570	GSM1420013	Negative	Negative	Negative	NA	NA	77.1667	77.1667	0	0	Breast	43.1047	NA	8.57588	486.631	2728.8	0.473994	0.0858	1.0051	1.0908	0.697455	9.52673	primary	IM
GSE103091	GPL570	GSM1420014	Negative	Negative	Negative	NA	NA	69.3333	69.3333	0	0	Breast	50.1218	NA	8.53213	281.596	-526.617	0.842429	0.1812	0.2025	0.3837	0.266324	7.79672	primary	MSL
GSE103091	GPL570	GSM1420016	Negative	Negative	Negative	NA	NA	68.7667	68.7667	0	0	Breast	59.2142	NA	9.11968	1258.88	1308.19	0.555523	0.19	0.5077	0.6976	0.154617	9.05939	primary	MSL
GSE103091	GPL570	GSM1420017	Negative	Negative	Negative	NA	NA	76.3	76.3	0	0	Breast	62.6338	NA	8.83138	833.209	1790.56	0.548585	0.0988	0.6947	0.7935	0.458371	9.01225	primary	LAR
GSE103091	GPL570	GSM1420020	Negative	Negative	Negative	NA	NA	52	52	0	0	Breast	67.7508	NA	8.19404	-830.089	1093.75	0.799887	0.0382	0.5005	0.5387	0.931163	10.137	primary	IM
GSE103091	GPL570	GSM1420025	Negative	Negative	Negative	NA	NA	111.7	111.7	0	0	Breast	37.8508	NA	8.90785	702.511	1823.59	0.560514	0.1722	0.6252	0.7974	0.410398	9.37122	primary	MSL
GSE103091	GPL570	GSM1420026	Negative	Negative	Negative	NA	NA	84.1333	84.1333	0	0	Breast	45.3717	NA	8.35607	-392.692	1235.08	0.74608	0.034	0.456	0.49	0.807539	10.0645	primary	SL
GSE103091	GPL570	GSM1420027	Negative	Negative	Negative	NA	NA	101.767	101.767	0	0	Breast	30.1465	NA	8.93715	631.661	626.375	0.704092	0.2762	0.371	0.6472	0.525431	9.86208	primary	SL
GSE103091	GPL570	GSM1420031	Negative	Negative	Negative	NA	NA	47.4	47.4	0	0	Breast	58.2834	NA	9.09988	596.069	1003.88	0.667581	0.2178	0.553	0.7708	0.3893	8.86871	primary	LAR
GSE103091	GPL570	GSM1420036	Negative	Negative	Negative	NA	NA	88.2667	88.2667	0	0	Breast	53.7522	NA	8.68628	279.67	414.937	0.760348	0.2396	0.2804	0.52	0.513094	9.82033	primary	SL
GSE103091	GPL570	GSM1420037	Negative	Negative	Negative	NA	NA	90.5667	90.5667	0	0	Breast	29.0486	NA	8.32036	1061.88	3104.35	0.346892	0.1838	1.1557	1.3395	0.715089	9.56851	primary	IM
GSE103091	GPL570	GSM1420040	Negative	Negative	Negative	NA	NA	54.4	54.4	0	0	Breast	67.4059	NA	8.70941	912.492	2412.55	0.459766	0.1436	0.8322	0.9757	0.506772	9.75216	primary	IM
GSE103091	GPL570	GSM1420042	Negative	Negative	Negative	NA	NA	73.9667	73.9667	0	0	Breast	52.0055	NA	9.08267	958.377	1965.54	0.511227	0.158	0.6583	0.8163	0.447684	9.50005	primary	LAR
GSE103091	GPL570	GSM1420044	Negative	Negative	Negative	NA	NA	63.0667	63.0667	0	0	Breast	55.0034	NA	8.22451	-664.158	1035.7	0.790283	0.0352	0.4403	0.4755	0.798466	10.1649	primary	SL
GSE103091	GPL570	GSM1420045	Negative	Negative	Negative	NA	NA	66.9667	66.9667	0	0	Breast	28.4819	NA	8.3683	69.6878	2670.12	0.534264	0.0519	0.9203	0.9722	0.691506	9.67538	primary	IM
GSE103091	GPL570	GSM1420046	Negative	Negative	Negative	NA	NA	67.5	67.5	0	0	Breast	58.2396	NA	9.0399	918.234	2750.76	0.414364	0.1993	0.9393	1.1386	0.245559	8.24361	primary	MSL
GSE103091	GPL570	GSM1420047	Negative	Negative	Negative	NA	NA	55.4667	55.4667	0	0	Breast	54.7406	NA	8.53687	251.55	1214.97	0.682035	0.2082	0.557	0.7652	0.822662	10.2616	primary	IM
GSE103091	GPL570	GSM1420048	Negative	Negative	Negative	NA	NA	54.4333	54.4333	0	0	Breast	69.87	NA	8.5201	-583.07	-156.636	0.879299	0.1294	0.2423	0.3718	0.36324	9.13683	primary	SL
GSE103091	GPL570	GSM1420049	Negative	Negative	Negative	NA	NA	59.3333	59.3333	0	0	Breast	69.5113	NA	9.16946	1076.51	1721.33	0.527045	0.1713	0.6601	0.8314	0.15768	8.76756	primary	MSL
GSE103091	GPL570	GSM1420050	Negative	Negative	Negative	NA	NA	54.6333	54.6333	0	0	Breast	44.8323	NA	8.74656	561.523	898.192	0.682765	0.2427	0.3229	0.5656	0.597612	9.64415	primary	MSL
GSE103091	GPL570	GSM1420052	Negative	Negative	Negative	NA	NA	54.9	54.9	0	0	Breast	49.7933	NA	8.92488	974.958	2191.47	0.480315	0.2263	0.7643	0.9906	0.408323	8.9966	primary	MSL
GSE103091	GPL570	GSM1420053	Negative	Negative	Negative	NA	NA	51.5667	51.5667	0	0	Breast	53.1472	NA	8.50389	9.28359	1753.82	0.64956	0.0768	0.6748	0.7515	0.776117	9.90352	primary	IM
GSE103091	GPL570	GSM1420054	Negative	Negative	Negative	NA	NA	42.0667	42.0667	0	0	Breast	66.308	NA	8.65239	1807.19	2905.73	0.270591	0.3866	1.0217	1.4083	0.213072	8.31679	primary	MSL
GSE103091	GPL570	GSM1420055	Negative	Negative	Negative	NA	NA	47.6667	47.6667	0	0	Breast	43.4826	NA	8.77142	1713.64	2745.2	0.306298	0.0668	1.0508	1.1176	0.313728	9.15873	primary	IM
GSE11078	GPL570	GSM279963	NA	NA	NA	0	NA	NA	NA	0	0	Breast	NA	NA	8.63882	0.1455	0.9348	1.0803	1078.77	2622.82	0.410004	0.327574	8.9864	primary	MSL
GSE11078	GPL570	GSM279964	NA	NA	NA	0	NA	NA	NA	0	0	Lung	NA	NA	8.981	0.0859	0.6767	0.7626	-39.0858	1527.51	0.679679	0.513169	9.96684	primary	SL
GSE11078	GPL570	GSM279965	NA	NA	NA	0	NA	NA	NA	0	0	Breast	NA	NA	9.05784	0.194	0.6164	0.8103	1216.31	1385.64	0.551258	0.055073	8.04243	primary	MSL
GSE11078	GPL570	GSM279968	NA	NA	NA	0	NA	NA	NA	0	0	Breast	NA	NA	9.16092	0.3418	0.5644	0.9062	1503.53	1678.67	0.478283	0.127247	8.06829	primary	MSL
GSE11078	GPL570	GSM279971	NA	NA	NA	0	NA	NA	NA	0	0	Breast	NA	NA	8.59988	0.1141	0.7475	0.8616	400.154	1940.51	0.582846	0.524807	9.71587	primary	SL
GSE11078	GPL570	GSM279973	NA	NA	NA	0	NA	NA	NA	0	0	Breast	NA	NA	8.94797	0.1558	0.9645	1.1202	1880.97	2777.94	0.278215	0.232249	8.48074	primary	MSL
GSE11078	GPL570	GSM279974	NA	NA	NA	0	NA	NA	NA	0	0	Lung	NA	NA	8.50463	0.0796	0.2598	0.3394	-508.397	92.5948	0.85567	0.684896	9.64544	primary	SL
GSE11078	GPL570	GSM279975	NA	NA	NA	0	NA	NA	NA	0	0	Lung	NA	NA	8.9031	0.18	0.4733	0.6534	794.355	1014.97	0.644387	0.522597	9.64767	primary	SL
GSE11078	GPL570	GSM279977	NA	NA	NA	0	NA	NA	NA	0	0	Lung	NA	NA	8.76021	0.1539	0.5137	0.6676	-17.5958	718.607	0.759737	0.537348	9.25485	primary	LAR
GSE11078	GPL570	GSM279978	NA	NA	NA	0	NA	NA	NA	0	0	Lung	NA	NA	8.86959	0.0726	0.6483	0.7208	457.381	1440.06	0.634442	0.794468	10.4441	primary	SL
GSE11078	GPL570	GSM279979	NA	NA	NA	0	NA	NA	NA	0	0	Breast	NA	NA	8.46884	0.1198	0.3572	0.477	59.4091	13.0234	0.816416	0.771036	9.98598	primary	SL
GSE11078	GPL570	GSM279981	NA	NA	NA	0	NA	NA	NA	0	0	Breast	NA	NA	8.84777	0.2042	0.4895	0.6938	470.108	908.329	0.691433	0.399256	8.23448	primary	LAR
GSE11078	GPL570	GSM279986	NA	NA	NA	0	NA	NA	NA	0	0	Breast	NA	NA	8.98506	0.2194	0.3596	0.579	717.421	734.146	0.683638	0.394873	9.19048	primary	LAR
GSE11078	GPL570	GSM279987	NA	NA	NA	0	NA	NA	NA	0	0	Breast	NA	NA	8.57516	0.1316	0.3075	0.4392	-152.159	153.958	0.822359	0.621688	9.57452	primary	LAR
GSE12276	GPL570	GSM308264	NA	NA	NA	NA	0	NA	37	NA	0	Breast	NA	NA	7.98082	-605.923	1384.09	0.752324	0.0442	0.7054	0.7496	0.957919	10.2639	primary	LAR
GSE12276	GPL570	GSM308271	NA	NA	NA	NA	0	NA	29	NA	0	Breast	NA	NA	8.70706	693.086	801.743	0.67899	0.0965	0.3905	0.487	0.534014	9.91885	primary	SL
GSE12276	GPL570	GSM308274	NA	NA	NA	NA	0	NA	29	NA	0	Breast	NA	NA	8.89719	1111.75	2513.73	0.420169	0.1676	0.8775	1.0451	0.4894	9.58705	primary	SL
GSE12276	GPL570	GSM308296	NA	NA	NA	NA	0	NA	32	NA	0	Breast	NA	NA	8.68414	564.52	1788.29	0.581396	0.2007	0.6956	0.8963	0.516281	9.66187	primary	MSL
GSE12276	GPL570	GSM308301	NA	NA	NA	NA	0	NA	15	NA	0	Breast	NA	NA	8.53773	-302.232	459.648	0.809149	0.1402	0.2597	0.3999	0.674623	9.99459	primary	SL
GSE12276	GPL570	GSM308310	NA	NA	NA	NA	0	NA	36	NA	0	Breast	NA	NA	8.62561	133.766	1514.33	0.662302	0.1364	0.6209	0.7573	0.668661	10.263	primary	LAR
GSE12276	GPL570	GSM308312	NA	NA	NA	NA	0	NA	115	NA	0	Breast	NA	NA	8.41441	-567.329	1262.33	0.76031	0	0.3398	0.3398	0.866188	10.4396	primary	SL
GSE12276	GPL570	GSM308327	NA	NA	NA	NA	0	NA	73	NA	0	Breast	NA	NA	8.41483	-809.136	625.563	0.837535	0.0167	0.3951	0.4118	0.681611	9.06539	primary	LAR
GSE12276	GPL570	GSM308337	NA	NA	NA	NA	0	NA	39	NA	0	Breast	NA	NA	8.51354	-689.935	-479.38	0.907566	0.2092	0.1555	0.3646	0.464506	9.04124	primary	LAR
GSE12276	GPL570	GSM308341	NA	NA	NA	NA	0	NA	17	NA	0	Breast	NA	NA	8.64971	610.289	2059.72	0.542896	0.157	0.7182	0.8752	0.807711	10.1102	primary	SL
GSE12276	GPL570	GSM308351	NA	NA	NA	NA	0	NA	30	NA	0	Breast	NA	NA	8.64613	361.611	1638.73	0.622695	0.0832	0.6839	0.7671	0.474048	8.95782	primary	LAR
GSE12276	GPL570	GSM308353	NA	NA	NA	NA	0	NA	64	NA	0	Breast	NA	NA	9.02269	759.427	955.986	0.654867	0.129	0.3565	0.4854	0.341475	9.1614	primary	LAR
GSE12276	GPL570	GSM308357	NA	NA	NA	NA	0	NA	16	NA	0	Breast	NA	NA	8.93344	686.928	1992.86	0.541691	0.0946	0.6698	0.7644	0.491941	9.73836	primary	SL
GSE12276	GPL570	GSM308380	NA	NA	NA	NA	0	NA	7	NA	0	Breast	NA	NA	9.02132	1029.87	1527.58	0.556697	0.2402	0.4928	0.733	0.412447	9.71163	primary	SL
GSE12276	GPL570	GSM308388	NA	NA	NA	NA	0	NA	17	NA	0	Breast	NA	NA	8.84458	865.352	1665.44	0.559944	0.0782	0.6399	0.7181	0.493311	9.7366	primary	SL
GSE12276	GPL570	GSM308409	NA	NA	NA	NA	0	NA	0	NA	0	Breast	NA	NA	9.22601	832.17	1293.18	0.608232	0.3572	0.4015	0.7587	0.168336	7.69956	primary	MSL
GSE2034	GPL96	GSM36778	Positive	NA	NA	0	1	NA	50	0	0	Breast	NA	NA	8.67317	0.0347	0.6765	0.7112	166.139	622.228	0.751337	0.651152	9.82351	primary	LAR
GSE2034	GPL96	GSM36784	Positive	NA	NA	0	1	NA	57	0	0	Breast	NA	NA	9.1086	0.19	0.6915	0.8815	700.237	1510.07	0.598287	0.411591	9.12014	primary	LAR
GSE2034	GPL96	GSM36789	Positive	NA	NA	0	1	NA	51	0	0	Breast	NA	NA	8.75891	0.0446	0.5239	0.5685	328.255	949.719	0.702011	0.361838	9.14274	primary	LAR
GSE2034	GPL96	GSM36792	Positive	NA	NA	0	1	NA	71	0	0	Breast	NA	NA	8.38288	0.0297	0.6567	0.6864	-416.096	593.908	0.807386	0.639908	9.62923	primary	LAR
GSE2034	GPL96	GSM36797	Negative	NA	NA	0	1	NA	9	0	0	Breast	NA	NA	8.63653	0.0953	0.5249	0.6202	262.51	1112.57	0.691789	0.669975	10.4573	primary	SL
GSE2034	GPL96	GSM36800	Negative	NA	NA	0	1	NA	37	0	0	Breast	NA	NA	8.35157	0.0474	0.5298	0.5772	-504.263	646.497	0.810456	0.538712	9.37432	primary	LAR
GSE2034	GPL96	GSM36811	Positive	NA	NA	0	1	NA	62	0	0	Breast	NA	NA	9.06415	0.0764	0.8363	0.9127	1575.56	1935.97	0.435287	0.345606	8.6223	primary	MSL
GSE2034	GPL96	GSM36813	Positive	NA	NA	0	1	NA	49	0	0	Breast	NA	NA	8.89334	0.1366	0.7627	0.8993	816.579	1181.52	0.622952	0.602457	9.53049	primary	LAR
GSE2034	GPL96	GSM36818	Positive	NA	NA	0	1	NA	62	0	0	Breast	NA	NA	9.03747	0.1904	0.5587	0.7491	1352.15	1179.89	0.559792	0.199044	9.10943	primary	MSL
GSE2034	GPL96	GSM36826	Positive	NA	NA	0	1	NA	58	0	0	Breast	NA	NA	9.19902	0.2254	0.7836	1.009	1276.69	2073.2	0.456524	0.27499	9.198	primary	MSL
GSE2034	GPL96	GSM36835	Negative	NA	NA	0	1	NA	14	0	0	Breast	NA	NA	8.51301	0.1735	0.7246	0.8981	286.765	1206.31	0.679178	0.643869	9.89331	primary	SL
GSE2034	GPL96	GSM36838	Positive	NA	NA	0	1	NA	34	0	0	Breast	NA	NA	8.4945	0.0432	0.4825	0.5258	-337.336	-225.447	0.866636	0.618567	9.64161	primary	LAR
GSE2034	GPL96	GSM36839	Positive	NA	NA	0	1	NA	32	0	0	Breast	NA	NA	8.69289	0.1158	0.4209	0.5368	-250.32	126.516	0.832709	0.359305	8.21862	primary	LAR
GSE2034	GPL96	GSM36862	Negative	NA	NA	0	1	NA	25	0	0	Breast	NA	NA	8.90309	0.131	0.5463	0.6772	814.719	1573.9	0.577112	0.4715	10.0651	primary	SL
GSE2034	GPL96	GSM36874	Positive	NA	NA	0	1	NA	30	0	0	Breast	NA	NA	8.81126	0.0398	0.6956	0.7355	93.739	1875.06	0.626311	0.52798	9.49458	primary	LAR
GSE2034	GPL96	GSM36875	Negative	NA	NA	0	1	NA	7	0	0	Breast	NA	NA	8.29645	0.0124	0.5671	0.5795	-67.0417	998.661	0.737295	0.834395	10.6034	primary	SL
GSE2034	GPL96	GSM36877	Positive	NA	NA	0	1	NA	43	0	0	Breast	NA	NA	8.75452	0.0204	1.0204	1.0408	357.326	2642.07	0.501674	0.632302	9.65199	primary	IM
GSE2034	GPL96	GSM36881	Positive	NA	NA	0	1	NA	11	0	0	Breast	NA	NA	8.74423	0.2276	0.4807	0.7083	452.246	199.609	0.764409	0.504183	9.55375	primary	LAR
GSE2034	GPL96	GSM36885	Positive	NA	NA	0	1	NA	40	0	0	Breast	NA	NA	9.14388	0.27	0.5078	0.7778	1082.29	1183.14	0.591785	0.225494	8.39194	primary	MSL
GSE2034	GPL96	GSM36888	Positive	NA	NA	0	1	NA	28	0	0	Breast	NA	NA	8.92449	0.1884	0.8151	1.0035	674.875	2121.79	0.527191	0.527383	9.52591	primary	IM
GSE2034	GPL96	GSM36897	Positive	NA	NA	0	1	NA	25	0	0	Breast	NA	NA	8.85779	0.1507	0.4867	0.6374	502.679	601.315	0.719968	0.535054	9.24469	primary	MSL
GSE2034	GPL96	GSM36898	Positive	NA	NA	0	1	NA	7	0	0	Breast	NA	NA	9.07319	0.1612	0.3732	0.5344	524.565	394.442	0.738545	0.37407	9.54442	primary	MSL
GSE2034	GPL96	GSM36902	Positive	NA	NA	0	1	NA	28	0	0	Breast	NA	NA	9.01308	0.1964	0.9515	1.1478	1381.08	2812.74	0.34309	0.404603	8.82869	primary	MSL
GSE2034	GPL96	GSM36903	Positive	NA	NA	0	1	NA	8	0	0	Breast	NA	NA	8.92641	0.1702	0.8813	1.0515	1311.82	2019.43	0.458957	0.460014	9.45595	primary	MSL
GSE2034	GPL96	GSM36905	Negative	NA	NA	0	1	NA	17	0	0	Breast	NA	NA	7.91378	0.0845	1.565	1.6495	390.992	3526.16	0.380943	0.688581	8.81257	primary	IM
GSE2034	GPL96	GSM36908	Positive	NA	NA	0	1	NA	15	0	0	Breast	NA	NA	8.54109	0.0782	0.5829	0.661	297.452	1896.46	0.600213	0.613956	9.60485	primary	LAR
GSE2034	GPL96	GSM36911	Positive	NA	NA	0	1	NA	80	0	0	Breast	NA	NA	8.62176	0.1064	0.6429	0.7494	208.204	1248.84	0.683051	0.45437	8.90933	primary	LAR
GSE2034	GPL96	GSM36918	Negative	NA	NA	0	1	NA	11	0	0	Breast	NA	NA	8.89174	0.1652	0.5803	0.7454	650.403	1435.86	0.612777	0.509024	9.4651	primary	SL
GSE2034	GPL96	GSM36923	Negative	NA	NA	0	1	NA	23	0	0	Breast	NA	NA	8.84308	0.1761	0.2918	0.4679	473.026	250.543	0.75758	0.424901	9.74295	primary	SL
GSE2034	GPL96	GSM36924	Positive	NA	NA	0	1	NA	29	0	0	Breast	NA	NA	8.34638	0.1376	0.3449	0.4824	-301.869	-138.945	0.857564	0.612566	9.77476	primary	LAR
GSE2034	GPL96	GSM36927	Positive	NA	NA	0	1	NA	8	0	0	Breast	NA	NA	8.33851	0.0013	0.6114	0.6127	-187.059	1854.93	0.660124	0.752037	10.1843	primary	SL
GSE2034	GPL96	GSM36928	Positive	NA	NA	0	1	NA	23	0	0	Breast	NA	NA	8.6928	0.1358	0.4579	0.5937	209.485	958.892	0.713377	0.53366	8.49658	primary	LAR
GSE2034	GPL96	GSM36931	Positive	NA	NA	0	1	NA	37	0	0	Breast	NA	NA	9.0284	0.0976	0.5344	0.632	772.924	1728.86	0.563467	0.43641	9.61374	primary	SL
GSE2034	GPL96	GSM36937	Negative	NA	NA	0	1	NA	11	0	0	Breast	NA	NA	8.67211	0.1167	0.5889	0.7056	225.562	1171.53	0.689452	0.63458	10.1313	primary	SL
GSE2034	GPL96	GSM36939	Positive	NA	NA	0	1	NA	14	0	0	Breast	NA	NA	8.60783	0.0316	0.4192	0.4508	-56.8912	655.368	0.769437	0.699241	10.2655	primary	LAR
GSE2034	GPL96	GSM36941	Negative	NA	NA	0	1	NA	9	0	0	Breast	NA	NA	8.29804	0.0711	0.697	0.7681	-191.299	1409.97	0.708184	0.923288	10.5603	primary	SL
GSE2034	GPL96	GSM36943	Positive	NA	NA	0	1	NA	19	0	0	Breast	NA	NA	8.97536	0.1548	0.5292	0.6841	484.177	963.319	0.684074	0.428769	9.1353	primary	LAR
GSE2034	GPL96	GSM36946	Positive	NA	NA	0	1	NA	26	0	0	Breast	NA	NA	8.88868	0.1093	0.5467	0.656	550.208	1166.56	0.654717	0.50416	9.49045	primary	LAR
GSE2034	GPL96	GSM36947	Positive	NA	NA	0	1	NA	16	0	0	Breast	NA	NA	8.20349	0.0714	0.3722	0.4436	-783.001	62.6551	0.877942	0.777921	10.4413	primary	LAR
GSE2034	GPL96	GSM36949	Negative	NA	NA	0	1	NA	6	0	0	Breast	NA	NA	8.43968	0.0935	0.812	0.9055	194.631	2173.36	0.579582	0.834186	10.4187	primary	SL
GSE2034	GPL96	GSM36950	Positive	NA	NA	0	1	NA	28	0	0	Breast	NA	NA	8.67276	0.2098	0.4524	0.6622	328.999	610.779	0.736486	0.399675	8.95123	primary	LAR
GSE2034	GPL96	GSM36952	Negative	NA	NA	0	1	NA	13	0	0	Breast	NA	NA	8.95435	0.105	0.6179	0.7228	821.52	1116.92	0.629779	0.443058	9.45071	primary	SL
GSE2034	GPL96	GSM36954	Positive	NA	NA	0	1	NA	19	0	0	Breast	NA	NA	8.15287	0.0829	0.304	0.3869	-1202.99	-627.66	0.943993	0.793887	10.2147	primary	LAR
GSE2034	GPL96	GSM36955	Negative	NA	NA	0	1	NA	25	0	0	Breast	NA	NA	9.05188	0.1598	0.9349	1.0947	1210.92	2616.36	0.393108	0.547631	9.39305	primary	IM
GSE2034	GPL96	GSM36956	Positive	NA	NA	0	1	NA	32	0	0	Breast	NA	NA	8.94422	0.1863	0.4579	0.6442	761.086	794.608	0.672404	0.448935	9.27586	primary	LAR
GSE2034	GPL96	GSM36957	Positive	NA	NA	0	1	NA	47	0	0	Breast	NA	NA	8.90037	0.2584	0.4565	0.7149	492.597	389.143	0.742222	0.345981	8.55452	primary	MSL
GSE2034	GPL96	GSM36960	Positive	NA	NA	0	1	NA	51	0	0	Breast	NA	NA	8.40984	0.1096	0.387	0.4966	-250.248	503.641	0.800791	0.522722	10.0904	primary	SL
GSE2034	GPL96	GSM36967	Positive	NA	NA	0	1	NA	15	0	0	Breast	NA	NA	9.21786	0.1712	0.6929	0.864	1107.62	2070.76	0.478776	0.334489	8.98781	primary	MSL
GSE2034	GPL96	GSM36969	Negative	NA	NA	0	1	NA	32	0	0	Breast	NA	NA	8.56184	0.0784	0.6436	0.722	-46.5706	1713.67	0.66021	0.77186	10.3431	primary	SL
GSE2034	GPL96	GSM36971	Positive	NA	NA	0	1	NA	19	0	0	Breast	NA	NA	8.80544	0.1491	0.4634	0.6125	667.652	780.287	0.684027	0.498174	9.13605	primary	LAR
GSE2034	GPL96	GSM36972	Positive	NA	NA	0	1	NA	37	0	0	Breast	NA	NA	9.03217	0.1296	0.5679	0.6975	994.895	1205.51	0.599451	0.375605	9.03367	primary	LAR
GSE2034	GPL96	GSM36973	Positive	NA	NA	0	1	NA	25	0	0	Breast	NA	NA	8.54471	0.0922	0.6447	0.7369	-112.917	1003.88	0.741314	0.526516	9.0171	primary	LAR
GSE2034	GPL96	GSM36974	Positive	NA	NA	0	1	NA	23	0	0	Breast	NA	NA	7.92892	0.0268	0.4118	0.4386	-1438.43	-87.8106	0.928311	0.790061	10.2994	primary	LAR
GSE2034	GPL96	GSM36976	Positive	NA	NA	0	1	NA	38	0	0	Breast	NA	NA	8.93251	0.1832	0.4843	0.6674	480.998	896.105	0.691574	0.503099	9.47363	primary	MSL
GSE2034	GPL96	GSM36983	Positive	NA	NA	0	1	NA	75	0	0	Breast	NA	NA	9.23098	0.1768	0.6144	0.7912	1131.62	1738.44	0.518006	0.221269	8.65847	primary	MSL
GSE2034	GPL96	GSM36985	Positive	NA	NA	0	1	NA	55	0	0	Breast	NA	NA	8.59843	0.0432	0.691	0.7342	7.46918	1478.97	0.679893	0.676555	9.831	primary	LAR
GSE2034	GPL96	GSM36986	Positive	NA	NA	0	1	NA	77	0	0	Breast	NA	NA	8.83228	0.089	0.7431	0.8321	503.339	1239.03	0.651871	0.475213	8.7603	primary	LAR
GSE2034	GPL96	GSM36989	Positive	NA	NA	0	1	NA	11	0	0	Breast	NA	NA	8.78953	0.1858	0.3773	0.563	640.185	648.511	0.700889	0.494161	9.53771	primary	LAR
GSE2034	GPL96	GSM36994	Positive	NA	NA	0	1	NA	2	0	0	Breast	NA	NA	9.01949	0.2596	0.5549	0.8145	1022.74	1304.37	0.584462	0.242549	8.49943	primary	MSL
GSE2034	GPL96	GSM36997	Positive	NA	NA	0	1	NA	44	0	0	Breast	NA	NA	8.5598	0.109	0.5427	0.6517	314.727	648.601	0.734143	0.661128	10.0156	primary	LAR
GSE2034	GPL96	GSM36998	Positive	NA	NA	0	1	NA	5	0	0	Breast	NA	NA	8.88091	0.1824	0.5163	0.6987	644.181	846.589	0.679427	0.34061	8.63648	primary	LAR
GSE2034	GPL96	GSM36999	Positive	NA	NA	0	1	NA	37	0	0	Breast	NA	NA	8.68438	0.173	0.5135	0.6865	199.63	463.239	0.763366	0.430615	8.74378	primary	LAR
GSE2034	GPL96	GSM37002	Negative	NA	NA	0	1	NA	16	0	0	Breast	NA	NA	8.63492	0.0666	0.5933	0.6599	-189.708	1226.06	0.726823	0.674585	10.2771	primary	SL
GSE2034	GPL96	GSM37003	Positive	NA	NA	0	1	NA	19	0	0	Breast	NA	NA	8.49737	0.0647	0.4325	0.4972	283.323	661.365	0.735998	0.746903	10.3859	primary	LAR
GSE2034	GPL96	GSM37004	Positive	NA	NA	0	1	NA	35	0	0	Breast	NA	NA	8.22746	0.0184	0.4755	0.4939	-733.605	450.061	0.845462	0.606769	9.19063	primary	LAR
GSE2034	GPL96	GSM37006	Positive	NA	NA	0	1	NA	71	0	0	Breast	NA	NA	8.72393	0.0632	0.6412	0.7044	501.76	1172.68	0.6594	0.596389	9.77502	primary	LAR
GSE2034	GPL96	GSM37007	Positive	NA	NA	0	1	NA	59	0	0	Breast	NA	NA	8.66542	0.0774	0.5985	0.6759	236.742	1602.65	0.641006	0.618283	9.92074	primary	LAR
GSE2034	GPL96	GSM37008	Positive	NA	NA	0	1	NA	70	0	0	Breast	NA	NA	9.14536	0.3912	0.6617	1.0529	1460.97	1386.54	0.520834	0.299853	8.97836	primary	MSL
GSE2034	GPL96	GSM37011	Positive	NA	NA	0	1	NA	60	0	0	Breast	NA	NA	8.76496	0.1344	0.4506	0.5851	229.583	573.122	0.749947	0.366344	9.0979	primary	LAR
GSE2034	GPL96	GSM37013	Positive	NA	NA	0	1	NA	66	0	0	Breast	NA	NA	9.14179	0.1685	0.5722	0.7407	847.366	989.049	0.641341	0.329406	8.80181	primary	LAR
GSE2034	GPL96	GSM37018	Positive	NA	NA	0	1	NA	20	0	0	Breast	NA	NA	9.0613	0.2708	0.4499	0.7207	638.625	1112.51	0.650895	0.479283	9.92333	primary	LAR
GSE2034	GPL96	GSM37022	Negative	NA	NA	0	1	NA	30	0	0	Breast	NA	NA	8.71716	0.0653	0.9462	1.0115	518.718	2473.49	0.502586	0.687688	9.93477	primary	SL
GSE2034	GPL96	GSM37026	Positive	NA	NA	0	1	NA	36	0	0	Breast	NA	NA	8.8282	0.1021	0.799	0.9011	114.297	1245.92	0.693362	0.470359	8.7822	primary	LAR
GSE2034	GPL96	GSM37027	Positive	NA	NA	0	1	NA	17	0	0	Breast	NA	NA	9.02631	0.1551	0.3571	0.5122	863.008	694.389	0.672219	0.371713	9.37751	primary	LAR
GSE2034	GPL96	GSM37028	Positive	NA	NA	0	1	NA	39	0	0	Breast	NA	NA	8.67692	0.1053	0.4155	0.5208	-8.54937	208.784	0.80544	0.473744	9.22863	primary	LAR
GSE2034	GPL96	GSM37029	Positive	NA	NA	0	1	NA	47	0	0	Breast	NA	NA	8.15828	0.0164	0.3792	0.3956	-637.919	-558.841	0.90925	0.655821	9.28009	primary	LAR
GSE2034	GPL96	GSM37030	Positive	NA	NA	0	1	NA	44	0	0	Breast	NA	NA	8.33119	0.0489	0.3965	0.4454	-936.267	-437.604	0.919764	0.620259	9.25491	primary	LAR
GSE2034	GPL96	GSM37035	Positive	NA	NA	0	1	NA	14	0	0	Breast	NA	NA	8.45232	0.1938	0.3999	0.5937	-136.097	383.368	0.801328	0.653279	10.2941	primary	LAR
GSE2034	GPL96	GSM37037	Positive	NA	NA	0	1	NA	19	0	0	Breast	NA	NA	8.71669	0.1152	0.6589	0.7741	192.656	1614.46	0.644634	0.486326	9.11061	primary	LAR
GSE2034	GPL96	GSM37038	Positive	NA	NA	0	1	NA	60	0	0	Breast	NA	NA	8.37553	0.0257	0.4326	0.4583	-779.355	1046.67	0.799565	0.690796	9.55474	primary	LAR
GSE2034	GPL96	GSM37039	Positive	NA	NA	0	1	NA	48	0	0	Breast	NA	NA	8.87008	0.1116	0.6344	0.746	739.273	943.575	0.658472	0.348038	8.72218	primary	LAR
GSE2034	GPL96	GSM37040	Negative	NA	NA	0	1	NA	6	0	0	Breast	NA	NA	8.93734	0.0735	0.8047	0.8782	912.953	2413.95	0.459523	0.472564	10.0417	primary	SL
GSE2034	GPL96	GSM37050	Negative	NA	NA	0	1	NA	18	0	0	Breast	NA	NA	8.9471	0.3108	1.1138	1.4246	1984.57	3047.18	0.225257	0.282439	8.86839	primary	MSL
GSE2034	GPL96	GSM37051	Positive	NA	NA	0	1	NA	18	0	0	Breast	NA	NA	9.11242	0.1204	0.8206	0.9411	1024.52	2480.36	0.436166	0.451884	9.47712	primary	SL
GSE2034	GPL96	GSM37053	Negative	NA	NA	0	1	NA	33	0	0	Breast	NA	NA	8.70166	0.1352	0.5083	0.6435	302.038	678.886	0.732387	0.477382	9.3104	primary	SL
GSE2034	GPL96	GSM37058	Positive	NA	NA	0	1	NA	64	0	0	Breast	NA	NA	9.20542	0.3345	0.5731	0.9076	1678.83	1787.62	0.441236	0.37046	9.29019	primary	MSL
GSE2034	GPL96	GSM36777	Positive	NA	NA	0	0	NA	79	0	0	Breast	NA	NA	9.01012	886.931	1126.61	0.621178	0.2148	0.4213	0.6361	0.312833	8.89562	primary	MSL
GSE2034	GPL96	GSM36779	Positive	NA	NA	0	0	NA	132	0	0	Breast	NA	NA	8.12035	-649.881	996.805	0.792492	0.0378	0.5707	0.6084	0.552878	8.49617	primary	LAR
GSE2034	GPL96	GSM36782	Positive	NA	NA	0	0	NA	66	0	0	Breast	NA	NA	9.24077	1306.47	1179.02	0.565441	0.3171	0.506	0.8231	0.197196	8.88484	primary	MSL
GSE2034	GPL96	GSM36783	Positive	NA	NA	0	0	NA	52	0	0	Breast	NA	NA	8.42139	-507.682	-126.328	0.871805	0.1839	0.2981	0.482	0.522426	8.89476	primary	LAR
GSE2034	GPL96	GSM36785	Positive	NA	NA	0	0	NA	57	0	0	Breast	NA	NA	9.02983	801.47	917.864	0.654432	0.19	0.4387	0.6287	0.319831	9.38633	primary	LAR
GSE2034	GPL96	GSM36787	Positive	NA	NA	0	0	NA	72	0	0	Breast	NA	NA	8.5291	106.067	1041.66	0.715497	0.0234	0.653	0.6764	0.604395	9.64566	primary	LAR
GSE2034	GPL96	GSM36788	Negative	NA	NA	0	0	NA	79	0	0	Breast	NA	NA	8.38058	211.127	2621.04	0.522755	0.0626	1.0761	1.1386	0.864594	10.5132	primary	IM
GSE2034	GPL96	GSM36790	Positive	NA	NA	0	0	NA	107	0	0	Breast	NA	NA	9.02502	833.738	1188.65	0.62016	0.1801	0.4488	0.6289	0.34592	8.34029	primary	MSL
GSE2034	GPL96	GSM36791	Negative	NA	NA	0	0	NA	79	0	0	Breast	NA	NA	9.00978	650.037	818.126	0.681858	0.1746	0.4432	0.6178	0.400997	9.13276	primary	LAR
GSE2034	GPL96	GSM36793	Negative	NA	NA	0	0	NA	101	0	0	Breast	NA	NA	8.7676	-111.676	709.647	0.769485	0.1046	0.3722	0.4768	0.396385	8.81943	primary	SL
GSE2034	GPL96	GSM36794	Positive	NA	NA	0	0	NA	87	0	0	Breast	NA	NA	8.80611	1848.16	3349.26	0.201499	0.1234	1.4608	1.5842	0.350799	8.57508	primary	IM
GSE2034	GPL96	GSM36795	Negative	NA	NA	0	0	NA	88	0	0	Breast	NA	NA	8.28633	-727.632	749.991	0.820638	0.1008	0.3019	0.4027	0.676317	9.73014	primary	SL
GSE2034	GPL96	GSM36796	Positive	NA	NA	0	0	NA	118	0	0	Breast	NA	NA	8.7368	188.732	1697.03	0.635767	0.1192	0.5246	0.6438	0.519231	9.43653	primary	LAR
GSE2034	GPL96	GSM36798	Negative	NA	NA	0	0	NA	106	0	0	Breast	NA	NA	8.84952	749.12	2639.65	0.451438	0.0748	0.9561	1.0308	0.539685	9.79341	primary	SL
GSE2034	GPL96	GSM36802	Positive	NA	NA	0	0	NA	92	0	0	Breast	NA	NA	8.77672	276.602	541.1	0.748489	0.1156	0.3051	0.4207	0.441265	8.94097	primary	LAR
GSE2034	GPL96	GSM36803	Positive	NA	NA	0	0	NA	93	0	0	Breast	NA	NA	8.66588	5.02464	446.122	0.78307	0.0669	0.4859	0.5528	0.58425	9.004	primary	LAR
GSE2034	GPL96	GSM36804	Positive	NA	NA	0	0	NA	88	0	0	Breast	NA	NA	8.86636	590.364	849.316	0.684911	0.1403	0.3913	0.5316	0.334331	8.75102	primary	LAR
GSE2034	GPL96	GSM36805	Positive	NA	NA	0	0	NA	100	0	0	Breast	NA	NA	8.3562	-456.973	477.222	0.820815	0.0724	0.3138	0.3863	0.516703	9.31977	primary	LAR
GSE2034	GPL96	GSM36806	Positive	NA	NA	0	0	NA	92	0	0	Breast	NA	NA	9.17938	847.926	665.842	0.676946	0.2507	0.3566	0.6073	0.214252	8.69615	primary	MSL
GSE2034	GPL96	GSM36807	Positive	NA	NA	0	0	NA	88	0	0	Breast	NA	NA	9.1944	730.267	1068.72	0.645546	0.1897	0.4193	0.609	0.303073	8.84155	primary	MSL
GSE2034	GPL96	GSM36808	Negative	NA	NA	0	0	NA	58	0	0	Breast	NA	NA	9.1586	886.061	1701.62	0.553006	0.1296	0.7209	0.8504	0.435549	9.39786	primary	SL
GSE2034	GPL96	GSM36809	Negative	NA	NA	0	0	NA	56	0	0	Breast	NA	NA	9.01947	1593.94	2125.03	0.407675	0.2387	0.8389	1.0776	0.202982	9.5743	primary	SL
GSE2034	GPL96	GSM36810	Positive	NA	NA	0	0	NA	105	0	0	Breast	NA	NA	8.67115	425.164	897.558	0.697318	0.1352	0.4669	0.6021	0.42319	9.33919	primary	LAR
GSE2034	GPL96	GSM36812	Negative	NA	NA	0	0	NA	80	0	0	Breast	NA	NA	9.03466	854.262	1177.63	0.619064	0.1736	0.4608	0.6344	0.306361	8.87932	primary	MSL
GSE2034	GPL96	GSM36816	Negative	NA	NA	0	0	NA	98	0	0	Breast	NA	NA	9.13576	1427.38	3223.22	0.279386	0.2607	1.1275	1.3882	0.448844	9.53044	primary	IM
GSE2034	GPL96	GSM36817	Positive	NA	NA	0	0	NA	113	0	0	Breast	NA	NA	8.34505	24.5874	3168.96	0.47682	0.0332	1.2557	1.2889	0.65838	9.15968	primary	IM
GSE2034	GPL96	GSM36819	Positive	NA	NA	0	0	NA	131	0	0	Breast	NA	NA	8.8354	48.3684	540.694	0.770319	0.0996	0.4085	0.5081	0.426626	9.33571	primary	LAR
GSE2034	GPL96	GSM36820	Positive	NA	NA	0	0	NA	141	0	0	Breast	NA	NA	8.36908	-85.6873	520.883	0.784524	0.0776	0.4022	0.4798	0.705507	9.9389	primary	LAR
GSE2034	GPL96	GSM36821	Positive	NA	NA	0	0	NA	88	0	0	Breast	NA	NA	8.56101	325.073	2007.75	0.583781	0.0809	0.7175	0.7984	0.551093	9.5508	primary	LAR
GSE2034	GPL96	GSM36822	Negative	NA	NA	0	0	NA	50	0	0	Breast	NA	NA	8.39986	-134.858	1461.89	0.696865	0.0778	0.4936	0.5714	0.732074	10.0355	primary	SL
GSE2034	GPL96	GSM36823	Positive	NA	NA	0	0	NA	119	0	0	Breast	NA	NA	8.49378	-10.3712	653.56	0.765229	0.0736	0.3098	0.3834	0.681868	10.213	primary	LAR
GSE2034	GPL96	GSM36824	Positive	NA	NA	0	0	NA	86	0	0	Breast	NA	NA	8.87534	513.42	1522.62	0.618587	0.1132	0.4463	0.5594	0.611373	10.0243	primary	SL
GSE2034	GPL96	GSM36825	Positive	NA	NA	0	0	NA	99	0	0	Breast	NA	NA	9.08139	947.863	2037.18	0.503495	0.3018	0.7589	1.0607	0.310459	8.52311	primary	MSL
GSE2034	GPL96	GSM36827	Negative	NA	NA	0	0	NA	156	0	0	Breast	NA	NA	8.66732	566.055	2854.26	0.447302	0.0551	1.0032	1.0583	0.695655	10.1079	primary	IM
GSE2034	GPL96	GSM36828	Negative	NA	NA	0	0	NA	76	0	0	Breast	NA	NA	8.49738	249.478	1968.07	0.597435	0.0508	0.7445	0.7953	0.785284	10.2042	primary	SL
GSE2034	GPL96	GSM36829	Positive	NA	NA	0	0	NA	157	0	0	Breast	NA	NA	8.90808	751.652	878.324	0.664293	0.2248	0.3206	0.5454	0.464912	9.98936	primary	LAR
GSE2034	GPL96	GSM36830	Positive	NA	NA	0	0	NA	117	0	0	Breast	NA	NA	8.78065	455.805	1166.74	0.665108	0.2047	0.4851	0.6898	0.339039	8.9036	primary	LAR
GSE2034	GPL96	GSM36831	Positive	NA	NA	0	0	NA	87	0	0	Breast	NA	NA	9.16021	1164.69	1036.52	0.599357	0.3168	0.4344	0.7512	0.155203	7.66893	primary	MSL
GSE2034	GPL96	GSM36832	Positive	NA	NA	0	0	NA	119	0	0	Breast	NA	NA	8.96809	996.462	1268.82	0.591802	0.2076	0.5245	0.732	0.308442	8.38893	primary	MSL
GSE2034	GPL96	GSM36836	Positive	NA	NA	0	0	NA	99	0	0	Breast	NA	NA	8.5554	14.0004	547.219	0.772919	0.1076	0.4945	0.6021	0.605741	9.20537	primary	LAR
GSE2034	GPL96	GSM36837	Positive	NA	NA	0	0	NA	137	0	0	Breast	NA	NA	8.71053	139.177	1166.4	0.69912	0.1252	0.7474	0.8726	0.561678	9.27645	primary	LAR
GSE2034	GPL96	GSM36840	Positive	NA	NA	0	0	NA	86	0	0	Breast	NA	NA	8.92005	816.697	1099.8	0.632278	0.2998	0.4467	0.7465	0.306932	8.88671	primary	MSL
GSE2034	GPL96	GSM36841	Positive	NA	NA	0	0	NA	134	0	0	Breast	NA	NA	8.73146	538.65	1303.29	0.640718	0.1042	0.5094	0.6135	0.450099	9.20135	primary	LAR
GSE2034	GPL96	GSM36843	Positive	NA	NA	0	0	NA	77	0	0	Breast	NA	NA	8.85986	568.707	1560.91	0.607736	0.1561	0.6072	0.7633	0.461346	9.22511	primary	LAR
GSE2034	GPL96	GSM36844	Positive	NA	NA	0	0	NA	121	0	0	Breast	NA	NA	8.60948	463.523	1595.2	0.615967	0.0899	0.6133	0.7032	0.631864	10.191	primary	LAR
GSE2034	GPL96	GSM36845	Positive	NA	NA	0	0	NA	54	0	0	Breast	NA	NA	8.3943	-616.968	695.719	0.81588	0.0522	0.6035	0.6557	0.388369	8.53831	primary	LAR
GSE2034	GPL96	GSM36846	Negative	NA	NA	0	0	NA	103	0	0	Breast	NA	NA	8.78656	409.912	1996.99	0.574917	0.0924	0.843	0.9354	0.67681	9.83448	primary	SL
GSE2034	GPL96	GSM36847	Negative	NA	NA	0	0	NA	85	0	0	Breast	NA	NA	8.27948	-410.754	1059.14	0.764737	0.0542	0.4334	0.4876	0.744565	10.2903	primary	SL
GSE2034	GPL96	GSM36848	Positive	NA	NA	0	0	NA	105	0	0	Breast	NA	NA	9.22715	1414.43	1499.39	0.512499	0.3372	0.5245	0.8617	0.270413	8.08542	primary	MSL
GSE2034	GPL96	GSM36849	Positive	NA	NA	0	0	NA	110	0	0	Breast	NA	NA	8.56356	-34.0715	953.466	0.738507	0.0599	0.4849	0.5448	0.475096	8.8044	primary	LAR
GSE2034	GPL96	GSM36850	Positive	NA	NA	0	0	NA	121	0	0	Breast	NA	NA	8.99297	1109.07	2094.05	0.475584	0.1838	0.7292	0.913	0.470723	8.96825	primary	MSL
GSE2034	GPL96	GSM36853	Positive	NA	NA	0	0	NA	105	0	0	Breast	NA	NA	8.90348	742.57	957.958	0.656517	0.3212	0.3622	0.6834	0.349475	8.72751	primary	MSL
GSE2034	GPL96	GSM36854	Negative	NA	NA	0	0	NA	105	0	0	Breast	NA	NA	8.67808	1178.17	3476.68	0.278788	0.177	1.3285	1.5055	0.462328	9.02908	primary	IM
GSE2034	GPL96	GSM36855	Negative	NA	NA	0	0	NA	128	0	0	Breast	NA	NA	8.81283	543.201	1142.39	0.658169	0.1286	0.429	0.5576	0.390414	9.91804	primary	SL
GSE2034	GPL96	GSM36857	Positive	NA	NA	0	0	NA	95	0	0	Breast	NA	NA	8.941	846.088	2562.79	0.448803	0.19	0.8447	1.0347	0.432813	9.17472	primary	IM
GSE2034	GPL96	GSM36859	Positive	NA	NA	0	0	NA	130	0	0	Breast	NA	NA	8.96575	757.456	1026.02	0.647283	0.2372	0.2698	0.507	0.18124	8.4892	primary	MSL
GSE2034	GPL96	GSM36863	Negative	NA	NA	0	0	NA	98	0	0	Breast	NA	NA	8.62706	779.038	3434.17	0.340416	0.0295	1.1099	1.1394	0.574499	9.44802	primary	IM
GSE2034	GPL96	GSM36864	Positive	NA	NA	0	0	NA	84	0	0	Breast	NA	NA	9.05142	1021.26	1139.68	0.604078	0.1327	0.4137	0.5464	0.281759	9.32223	primary	LAR
GSE2034	GPL96	GSM36865	Negative	NA	NA	0	0	NA	103	0	0	Breast	NA	NA	8.64509	477.256	1817.57	0.5883	0.1798	0.6408	0.8206	0.510079	10.1124	primary	SL
GSE2034	GPL96	GSM36866	Positive	NA	NA	0	0	NA	107	0	0	Breast	NA	NA	8.11049	-1248.56	2.60871	0.912232	0.0335	0.4337	0.4672	0.456735	8.77522	primary	LAR
GSE2034	GPL96	GSM36867	Positive	NA	NA	0	0	NA	108	0	0	Breast	NA	NA	8.26224	-875.375	115.92	0.880676	0.052	0.2999	0.3519	0.460641	9.26269	primary	LAR
GSE2034	GPL96	GSM36868	Positive	NA	NA	0	0	NA	123	0	0	Breast	NA	NA	9.05034	798.043	1100.05	0.634368	0.2117	0.4089	0.6206	0.297181	8.21866	primary	MSL
GSE2034	GPL96	GSM36869	Positive	NA	NA	0	0	NA	126	0	0	Breast	NA	NA	9.07585	890.496	1063.87	0.627961	0.2476	0.3601	0.6077	0.246017	8.27918	primary	MSL
GSE2034	GPL96	GSM36871	Positive	NA	NA	0	0	NA	84	0	0	Breast	NA	NA	8.97364	916.571	1299.61	0.597596	0.269	0.4918	0.7608	0.36982	8.34077	primary	MSL
GSE2034	GPL96	GSM36873	Positive	NA	NA	0	0	NA	100	0	0	Breast	NA	NA	8.48505	-65.0348	891.142	0.74767	0.124	0.4497	0.5737	0.511141	9.58364	primary	LAR
GSE2034	GPL96	GSM36876	Negative	NA	NA	0	0	NA	133	0	0	Breast	NA	NA	8.31707	-245.72	869.642	0.767046	0.0724	0.3549	0.4273	0.812025	10.3694	primary	SL
GSE2034	GPL96	GSM36878	Positive	NA	NA	0	0	NA	98	0	0	Breast	NA	NA	8.40007	-370.805	-44.9749	0.855668	0.1528	0.2462	0.399	0.537385	9.4987	primary	LAR
GSE2034	GPL96	GSM36880	Positive	NA	NA	0	0	NA	97	0	0	Breast	NA	NA	9.1736	1192.18	2772.18	0.374528	0.2688	0.8338	1.1026	0.38929	9.03861	primary	MSL
GSE2034	GPL96	GSM36882	Positive	NA	NA	0	0	NA	99	0	0	Breast	NA	NA	8.98032	420.388	877.527	0.699923	0.1564	0.3285	0.4848	0.379315	8.94812	primary	MSL
GSE2034	GPL96	GSM36883	Positive	NA	NA	0	0	NA	88	0	0	Breast	NA	NA	9.08437	643.73	1909.84	0.557171	0.2589	0.6339	0.8928	0.298823	8.71101	primary	MSL
GSE2034	GPL96	GSM36886	Negative	NA	NA	0	0	NA	94	0	0	Breast	NA	NA	9.12671	1411.83	1539.07	0.507818	0.3143	0.4646	0.7788	0.233972	9.23385	primary	MSL
GSE2034	GPL96	GSM36887	Positive	NA	NA	0	0	NA	108	0	0	Breast	NA	NA	8.98064	770.285	1698.2	0.567498	0.222	0.7217	0.9438	0.387513	8.48629	primary	MSL
GSE2034	GPL96	GSM36889	Positive	NA	NA	0	0	NA	108	0	0	Breast	NA	NA	9.08501	1774.03	3161.38	0.239013	0.2903	1.1511	1.4414	0.307605	9.04609	primary	MSL
GSE2034	GPL96	GSM36890	Positive	NA	NA	0	0	NA	116	0	0	Breast	NA	NA	8.98611	497.037	2260.52	0.53206	0.1356	0.7089	0.8446	0.411677	9.11352	primary	IM
GSE2034	GPL96	GSM36891	Negative	NA	NA	0	0	NA	87	0	0	Breast	NA	NA	8.89651	303.261	1194.15	0.678711	0.0849	0.5007	0.5856	0.596649	9.58055	primary	SL
GSE2034	GPL96	GSM36893	Positive	NA	NA	0	0	NA	124	0	0	Breast	NA	NA	8.71248	406.214	1089.32	0.678913	0.2757	0.4539	0.7296	0.499584	9.1964	primary	LAR
GSE2034	GPL96	GSM36895	Positive	NA	NA	0	0	NA	96	0	0	Breast	NA	NA	8.22783	-877.953	-396.039	0.913911	0.1257	0.5222	0.6479	0.554999	8.89568	primary	LAR
GSE2034	GPL96	GSM36899	Positive	NA	NA	0	0	NA	169	0	0	Breast	NA	NA	7.98103	-913.705	-131.768	0.899783	0.0871	0.2161	0.3032	0.727472	10.0984	primary	LAR
GSE2034	GPL96	GSM36900	Positive	NA	NA	0	0	NA	109	0	0	Breast	NA	NA	8.32893	-895.893	837.966	0.827316	0.0522	0.4615	0.5137	0.882529	10.0719	primary	SL
GSE2034	GPL96	GSM36901	Positive	NA	NA	0	0	NA	101	0	0	Breast	NA	NA	8.01757	-966.605	625.306	0.849959	0.0547	0.3275	0.3822	0.892859	10.2918	primary	SL
GSE2034	GPL96	GSM36906	Negative	NA	NA	0	0	NA	101	0	0	Breast	NA	NA	8.63523	643.075	3163.15	0.395948	0.106	1.1729	1.2789	0.656492	9.9151	primary	IM
GSE2034	GPL96	GSM36907	Positive	NA	NA	0	0	NA	86	0	0	Breast	NA	NA	8.99425	778.937	1696.93	0.566606	0.1825	0.4928	0.6753	0.328795	9.0671	primary	MSL
GSE2034	GPL96	GSM36909	Negative	NA	NA	0	0	NA	95	0	0	Breast	NA	NA	8.6207	1615.55	2162.27	0.399772	0.2934	0.7325	1.0259	0.0573642	8.26984	primary	MSL
GSE2034	GPL96	GSM36910	Positive	NA	NA	0	0	NA	125	0	0	Breast	NA	NA	9.03442	610.218	1138.5	0.651164	0.3429	0.3939	0.7369	0.43836	8.83073	primary	MSL
GSE2034	GPL96	GSM36912	Negative	NA	NA	0	0	NA	97	0	0	Breast	NA	NA	8.38275	247.432	1991.23	0.594947	0.0644	0.4649	0.5293	0.715783	10.3479	primary	SL
GSE2034	GPL96	GSM36913	Positive	NA	NA	0	0	NA	109	0	0	Breast	NA	NA	8.94964	804.79	1221.76	0.61968	0.2258	0.4986	0.7244	0.304439	8.55695	primary	MSL
GSE2034	GPL96	GSM36914	Positive	NA	NA	0	0	NA	84	0	0	Breast	NA	NA	9.02087	811.79	1270.59	0.613227	0.2236	0.4693	0.6929	0.303351	9.01784	primary	MSL
GSE2034	GPL96	GSM36916	Positive	NA	NA	0	0	NA	125	0	0	Breast	NA	NA	9.11577	1284.09	1508.56	0.527692	0.263	0.5508	0.8138	0.281856	8.00722	primary	MSL
GSE2034	GPL96	GSM36917	Positive	NA	NA	0	0	NA	144	0	0	Breast	NA	NA	8.59295	137.711	868.027	0.729902	0.1279	0.4419	0.5698	0.464777	8.82168	primary	MSL
GSE2034	GPL96	GSM36919	Positive	NA	NA	0	0	NA	153	0	0	Breast	NA	NA	8.886	500.781	140.707	0.765389	0.2114	0.3591	0.5706	0.460687	9.14765	primary	MSL
GSE2034	GPL96	GSM36922	Positive	NA	NA	0	0	NA	113	0	0	Breast	NA	NA	8.39997	-271.341	240.046	0.825113	0.1147	0.5119	0.6266	0.508996	9.2703	primary	LAR
GSE2034	GPL96	GSM36925	Positive	NA	NA	0	0	NA	104	0	0	Breast	NA	NA	8.95186	466.387	633.774	0.720358	0.246	0.3757	0.6217	0.281545	8.70214	primary	MSL
GSE2034	GPL96	GSM36932	Positive	NA	NA	0	0	NA	96	0	0	Breast	NA	NA	9.29551	1633.56	1904.44	0.431786	0.3926	0.6589	1.0515	0.149939	8.20904	primary	MSL
GSE2034	GPL96	GSM36933	Positive	NA	NA	0	0	NA	110	0	0	Breast	NA	NA	8.71218	331.496	2645.34	0.504535	0.0718	0.9915	1.0633	0.510906	9.19546	primary	IM
GSE2034	GPL96	GSM36935	Negative	NA	NA	0	0	NA	114	0	0	Breast	NA	NA	8.93553	743.547	2778.39	0.433911	0.1664	0.8553	1.0217	0.600508	9.90231	primary	SL
GSE2034	GPL96	GSM36936	Positive	NA	NA	0	0	NA	109	0	0	Breast	NA	NA	9.2023	1609.95	2253.63	0.388202	0.2527	0.6979	0.9506	0.0742751	8.10754	primary	MSL
GSE2034	GPL96	GSM36938	Positive	NA	NA	0	0	NA	108	0	0	Breast	NA	NA	8.95608	910.758	1741.44	0.545091	0.1922	0.6458	0.838	0.314216	9.18568	primary	LAR
GSE2034	GPL96	GSM36940	Negative	NA	NA	0	0	NA	134	0	0	Breast	NA	NA	8.83422	387.397	1932.28	0.585347	0.1318	0.5079	0.6396	0.605211	10.1145	primary	SL
GSE2034	GPL96	GSM36942	Positive	NA	NA	0	0	NA	152	0	0	Breast	NA	NA	8.70091	910.45	2337.1	0.469837	0.1339	0.8346	0.9685	0.538851	8.68178	primary	IM
GSE2034	GPL96	GSM36944	Positive	NA	NA	0	0	NA	112	0	0	Breast	NA	NA	9.0779	1470.18	1934.75	0.44932	0.1414	0.6855	0.8268	0.348448	8.90427	primary	MSL
GSE2034	GPL96	GSM36945	Positive	NA	NA	0	0	NA	92	0	0	Breast	NA	NA	9.01737	436.422	950.112	0.690574	0.1075	0.3967	0.5042	0.314142	8.73595	primary	LAR
GSE2034	GPL96	GSM36948	Positive	NA	NA	0	0	NA	87	0	0	Breast	NA	NA	8.03222	-1060.29	-169.697	0.91127	0.0527	0.3777	0.4304	0.580706	9.30041	primary	LAR
GSE2034	GPL96	GSM36958	Positive	NA	NA	0	0	NA	111	0	0	Breast	NA	NA	9.07099	1096.22	2429.74	0.433379	0.1272	0.779	0.9062	0.397875	8.81016	primary	MSL
GSE2034	GPL96	GSM36959	Negative	NA	NA	0	0	NA	120	0	0	Breast	NA	NA	8.44928	465.997	1338.41	0.644939	0.0486	0.4325	0.4812	0.675156	10.2568	primary	SL
GSE2034	GPL96	GSM36962	Positive	NA	NA	0	0	NA	114	0	0	Breast	NA	NA	9.17101	879.596	696.107	0.670227	0.3017	0.2829	0.5846	0.278337	8.34956	primary	MSL
GSE2034	GPL96	GSM36965	Positive	NA	NA	0	0	NA	134	0	0	Breast	NA	NA	8.93461	1055.4	2172	0.472446	0.3	0.7517	1.0517	0.420707	9.25018	primary	MSL
GSE2034	GPL96	GSM36966	Negative	NA	NA	0	0	NA	90	0	0	Breast	NA	NA	8.59717	294.212	1490.46	0.64715	0.0944	0.436	0.5304	0.704052	10.2796	primary	SL
GSE2034	GPL96	GSM36970	Positive	NA	NA	0	0	NA	116	0	0	Breast	NA	NA	8.80246	514.56	679.42	0.710738	0.27	0.2807	0.5507	0.427215	8.47116	primary	MSL
GSE2034	GPL96	GSM36977	Negative	NA	NA	0	0	NA	124	0	0	Breast	NA	NA	8.62419	-100.251	1622.61	0.676017	0.0815	0.5573	0.6388	0.664321	10.0689	primary	SL
GSE2034	GPL96	GSM36979	Positive	NA	NA	0	0	NA	107	0	0	Breast	NA	NA	8.78214	377.996	1392.86	0.648695	0.2246	0.5143	0.7389	0.590373	9.86172	primary	LAR
GSE2034	GPL96	GSM36980	Positive	NA	NA	0	0	NA	122	0	0	Breast	NA	NA	8.68812	226.359	1300.43	0.675538	0.1301	0.4799	0.6101	0.398009	8.56219	primary	LAR
GSE2034	GPL96	GSM36981	Negative	NA	NA	0	0	NA	87	0	0	Breast	NA	NA	8.3263	-1.17454	679.487	0.761899	0.1282	0.2131	0.3413	0.645534	10.3035	primary	SL
GSE2034	GPL96	GSM36982	Positive	NA	NA	0	0	NA	92	0	0	Breast	NA	NA	9.09797	757.826	1933.33	0.540287	0.1744	0.5931	0.7675	0.30645	8.60684	primary	MSL
GSE2034	GPL96	GSM36987	Positive	NA	NA	0	0	NA	97	0	0	Breast	NA	NA	8.62587	-234.848	856.37	0.767272	0.2224	0.3367	0.5591	0.570103	9.31299	primary	LAR
GSE2034	GPL96	GSM36988	Positive	NA	NA	0	0	NA	96	0	0	Breast	NA	NA	8.80449	745.195	1302.55	0.617235	0.2338	0.4219	0.6557	0.447876	9.488	primary	LAR
GSE2034	GPL96	GSM36990	Positive	NA	NA	0	0	NA	143	0	0	Breast	NA	NA	8.87201	484.614	966.623	0.683673	0.3057	0.3857	0.6915	0.3684	8.48742	primary	MSL
GSE2034	GPL96	GSM36991	Negative	NA	NA	0	0	NA	114	0	0	Breast	NA	NA	8.48377	171.067	1624.8	0.645897	0.069	0.3897	0.4587	0.688757	10.4097	primary	SL
GSE2034	GPL96	GSM36993	Positive	NA	NA	0	0	NA	98	0	0	Breast	NA	NA	9.14857	1391.63	1563.73	0.507256	0.39	0.4387	0.8287	0.150051	8.05406	primary	MSL
GSE2034	GPL96	GSM37000	Positive	NA	NA	0	0	NA	137	0	0	Breast	NA	NA	9.12277	1389.24	2145.21	0.432256	0.2883	0.6689	0.9572	0.25351	8.50777	primary	MSL
GSE2034	GPL96	GSM37009	Positive	NA	NA	0	0	NA	122	0	0	Breast	NA	NA	9.12658	1368.87	2004.55	0.453447	0.17	0.7389	0.9089	0.30359	9.20351	primary	MSL
GSE2034	GPL96	GSM37010	Positive	NA	NA	0	0	NA	101	0	0	Breast	NA	NA	8.4985	-336.166	-274.681	0.870134	0.0594	0.3648	0.4242	0.407249	9.0513	primary	LAR
GSE2034	GPL96	GSM37015	Positive	NA	NA	0	0	NA	122	0	0	Breast	NA	NA	9.00526	754.49	733.876	0.679686	0.226	0.4235	0.6495	0.248256	8.68672	primary	MSL
GSE2034	GPL96	GSM37017	Negative	NA	NA	0	0	NA	108	0	0	Breast	NA	NA	8.60742	241.665	1610.69	0.639544	0.0765	0.5681	0.6446	0.601237	9.81921	primary	SL
GSE2034	GPL96	GSM37021	Negative	NA	NA	0	0	NA	109	0	0	Breast	NA	NA	8.14357	-583.437	1828.4	0.705454	0	0.6425	0.6425	0.986009	10.588	primary	SL
GSE2034	GPL96	GSM37024	Positive	NA	NA	0	0	NA	95	0	0	Breast	NA	NA	9.27424	1037.86	1035.5	0.614273	0.211	0.4771	0.6882	0.192332	8.89868	primary	MSL
GSE2034	GPL96	GSM37032	Positive	NA	NA	0	0	NA	86	0	0	Breast	NA	NA	9.03706	1011.11	2007.48	0.499235	0.2268	0.7978	1.0246	0.341541	8.86711	primary	MSL
GSE2034	GPL96	GSM37043	Negative	NA	NA	0	0	NA	161	0	0	Breast	NA	NA	8.80296	721.207	1377.78	0.6113	0.128	0.4406	0.5687	0.484101	10.0093	primary	SL
GSE2034	GPL96	GSM37044	Positive	NA	NA	0	0	NA	112	0	0	Breast	NA	NA	8.71741	-266.88	502.398	0.802359	0.1112	0.5408	0.652	0.457226	8.81457	primary	LAR
GSE2034	GPL96	GSM37045	Negative	NA	NA	0	0	NA	123	0	0	Breast	NA	NA	8.29144	-66.632	2711.12	0.546039	0.0174	0.8639	0.8814	0.89174	10.5166	primary	IM
GSE2034	GPL96	GSM37046	Positive	NA	NA	0	0	NA	86	0	0	Breast	NA	NA	9.046	1114.4	2138.81	0.469104	0.2042	0.6709	0.8751	0.278715	8.89326	primary	MSL
GSE2034	GPL96	GSM37047	Positive	NA	NA	0	0	NA	108	0	0	Breast	NA	NA	8.68393	259.84	1673.85	0.63032	0.046	0.7221	0.7681	0.632908	10.3386	primary	SL
GSE2034	GPL96	GSM37048	Negative	NA	NA	0	0	NA	87	0	0	Breast	NA	NA	8.93881	195.103	662.718	0.74457	0.1018	0.3684	0.4702	0.328583	8.93394	primary	SL
GSE2034	GPL96	GSM37056	Negative	NA	NA	0	0	NA	82	0	0	Breast	NA	NA	9.02365	805.669	440.912	0.705285	0.318	0.2866	0.6046	0.299298	8.33656	primary	MSL
GSE2034	GPL96	GSM37057	Positive	NA	NA	0	0	NA	59	0	0	Breast	NA	NA	8.86455	494.083	487.704	0.732301	0.1338	0.3366	0.4704	0.309762	9.07057	primary	LAR
GSE2034	GPL96	GSM37059	Positive	NA	NA	0	0	NA	83	0	0	Breast	NA	NA	9.17788	1443.71	1757.53	0.475827	0.2928	0.7107	1.0036	0.222296	8.19038	primary	MSL
GSE2034	GPL96	GSM37061	Negative	NA	NA	0	0	NA	105	0	0	Breast	NA	NA	8.84152	428.521	13.4907	0.783903	0.2324	0.1879	0.4203	0.333396	8.60371	primary	LAR
GSE2034	GPL96	GSM37062	Positive	NA	NA	0	0	NA	54	0	0	Breast	NA	NA	8.70328	311.104	999.769	0.698564	0.1426	0.4527	0.5954	0.663084	10.0461	primary	LAR
GSE46563	GPL6884	GSM1132491	Negative	NA	Negative	0	NA	NA	64	NA	0	Breast	NA	2	8.77298	0.0372	1.2785	1.3157	743.964	2940.92	0.41224	0.587403	9.39226	primary	SL
GSE46563	GPL6884	GSM1132512	Negative	NA	Negative	0	NA	NA	71	NA	0	Breast	NA	3	8.71156	0.0004	1.0324	1.0328	728.349	2813.5	0.431276	0.718979	10.1397	primary	SL
GSE46563	GPL6884	GSM1132514	Negative	NA	Negative	0	NA	NA	49	NA	0	Breast	NA	2	8.0933	0.0468	0.345	0.3918	-889.127	-394.156	0.914464	0.780769	10.3172	primary	SL
GSE46563	GPL6884	GSM1132521	Negative	NA	Negative	0	NA	NA	122	NA	0	Breast	NA	2	8.32164	0.0972	0.3198	0.417	-599.735	-293.295	0.889795	0.581293	9.22114	primary	SL
GSE46563	GPL6884	GSM1132430	Negative	NA	Negative	0	NA	NA	150	NA	0	Breast	NA	3	8.89184	723.721	2153.93	0.517052	0.0834	0.7385	0.8219	0.776431	10.5869	primary	SL
GSE46563	GPL6884	GSM1132452	Negative	NA	Negative	0	NA	NA	150	NA	0	Breast	NA	3	8.44197	216.696	2215.72	0.57185	0.0688	1.0056	1.0745	0.696246	10.2421	primary	SL
GSE46563	GPL6884	GSM1132470	Negative	NA	Negative	0	NA	NA	143	NA	0	Breast	NA	3	8.57841	-95.9598	867.431	0.752972	0.0963	0.4721	0.5684	0.721376	10.3289	primary	SL
GSE46563	GPL6884	GSM1132481	Negative	NA	Negative	0	NA	NA	92	NA	0	Breast	NA	2	8.82904	324.38	2066.38	0.576855	0.0406	0.4407	0.4813	0.677532	10.3686	primary	SL
GSE46563	GPL6884	GSM1132484	Negative	NA	Negative	0	NA	NA	94	NA	0	Breast	NA	3	8.52759	-396.611	978.256	0.771013	0.0698	0.4086	0.4784	0.840569	10.4561	primary	SL
GSE46563	GPL6884	GSM1132485	Negative	NA	Negative	0	NA	NA	138	NA	0	Breast	NA	3	8.54104	-33.6864	1840.92	0.644621	0.0651	0.6258	0.6909	0.943627	10.8243	primary	SL
GSE46563	GPL6884	GSM1132494	Negative	NA	Negative	0	NA	NA	135	NA	0	Breast	NA	3	8.69436	-60.4633	976.031	0.738885	0.0933	0.4721	0.5654	0.605151	9.56969	primary	LAR
GSE46563	GPL6884	GSM1132508	Negative	NA	Negative	0	NA	NA	151	NA	0	Breast	NA	2	8.37108	-374.028	146.335	0.841056	0.1088	0.1814	0.2902	0.743001	10.1319	primary	SL
GSE46563	GPL6884	GSM1132517	Negative	NA	Negative	0	NA	NA	160	NA	0	Breast	NA	3	8.49613	-239.162	1444.43	0.709572	0.0398	0.6031	0.6428	0.858693	10.4479	primary	SL
GSE46563	GPL6884	GSM1132522	Negative	NA	Negative	0	NA	NA	112	NA	0	Breast	NA	3	8.66416	217.844	1338.54	0.672328	0.071	0.7039	0.7748	0.733554	10.8669	primary	SL
GSE46928	GPL96	GSM1141274	NA	NA	Positive	NA	NA	NA	NA	NA	0	Breast	NA	NA	8.58729	23.265	1626.74	0.662093	0.1238	0.6193	0.7431	0.762283	10.0415	primary	IM
GSE46928	GPL96	GSM1141277	NA	NA	NA	NA	NA	NA	NA	NA	0	Breast	NA	NA	8.85288	1211.73	1219.1	0.572041	0.2622	0.6687	0.9309	0.365635	8.32802	primary	MSL
GSE46928	GPL96	GSM1141278	NA	NA	NA	NA	NA	NA	NA	NA	0	Breast	NA	NA	8.63665	160.811	810.427	0.733354	0.1046	0.3549	0.4595	0.54136	9.48102	primary	SL
GSE46928	GPL96	GSM1141279	NA	NA	Positive	NA	NA	NA	NA	NA	0	Breast	NA	NA	8.76228	126.383	307.467	0.784646	0.1024	0.1607	0.2632	0.475648	9.6843	primary	LAR
GSE46928	GPL96	GSM1141280	NA	NA	Positive	NA	NA	NA	NA	NA	0	Breast	NA	NA	8.88512	1002.69	2414.67	0.447691	0.1841	0.891	1.0751	0.537298	9.55467	primary	IM
GSE46928	GPL96	GSM1141282	NA	NA	NA	NA	NA	NA	NA	NA	0	Breast	NA	NA	8.92853	1290.7	2142.26	0.44564	0.313	0.7528	1.0658	0.277143	8.45516	primary	MSL
GSE46928	GPL96	GSM1141285	NA	NA	Positive	NA	NA	NA	NA	NA	0	Breast	NA	NA	9.11912	1764.06	2033.76	0.397079	0.4972	0.5255	1.0227	0.136615	8.07438	primary	MSL
GSE46928	GPL96	GSM1141286	NA	NA	NA	NA	NA	NA	NA	NA	0	Breast	NA	NA	8.59146	-276.053	1048.44	0.752883	0.1044	0.5427	0.6471	0.705276	9.81582	primary	SL
GSE46928	GPL96	GSM1141291	NA	NA	Positive	NA	NA	NA	NA	NA	0	Breast	NA	NA	8.45588	979.523	2852.6	0.392453	0.1008	1.0972	1.198	0.321281	8.34751	primary	IM
GSE46928	GPL96	GSM1141292	NA	NA	NA	NA	NA	NA	NA	NA	0	Breast	NA	NA	8.9519	1119.72	1493.31	0.549902	0.436	0.4457	0.8816	0.286029	8.51804	primary	MSL
GSE46928	GPL96	GSM1141296	NA	NA	Positive	NA	NA	NA	NA	NA	0	Breast	NA	NA	8.4297	-862.092	597.446	0.843978	0.0281	0.2371	0.2652	0.769575	10.5627	primary	SL
GSE46928	GPL96	GSM1141299	NA	NA	NA	NA	NA	NA	NA	NA	0	Breast	NA	NA	8.53394	521.806	2408.56	0.510414	0.0144	0.9847	0.9991	0.683691	9.69308	primary	IM
GSE46928	GPL96	GSM1141301	NA	NA	NA	NA	NA	NA	NA	NA	0	Breast	NA	NA	8.70195	884.932	1509.25	0.576445	0.1644	0.5978	0.7622	0.276147	8.60962	primary	LAR
GSE46928	GPL96	GSM1141303	NA	NA	NA	NA	NA	NA	NA	NA	0	Breast	NA	NA	8.70839	-82.4684	467.49	0.789069	0.113	0.2888	0.4018	0.497491	9.39375	primary	LAR
GSE46928	GPL96	GSM1141304	NA	NA	NA	NA	NA	NA	NA	NA	0	Breast	NA	NA	8.9526	1100.74	1281.42	0.577886	0.3356	0.4419	0.7775	0.272767	8.65867	primary	MSL
GSE46928	GPL96	GSM1141307	NA	NA	NA	NA	NA	NA	NA	NA	0	Breast	NA	NA	8.81141	527.434	1125.59	0.66176	0.1427	0.4655	0.6083	0.4817	9.34546	primary	SL
GSE46928	GPL96	GSM1141308	NA	NA	NA	NA	NA	NA	NA	NA	0	Breast	NA	NA	8.34889	-222.176	1582.25	0.693377	0.056	0.5512	0.6073	0.682493	10.462	primary	SL
GSE46928	GPL96	GSM1141316	NA	NA	NA	NA	NA	NA	NA	NA	0	Breast	NA	NA	8.8517	1702.87	2445.92	0.349291	0.1956	1.1251	1.3207	0.247896	8.34927	primary	MSL
GSE46928	GPL96	GSM1141317	NA	NA	NA	NA	NA	NA	NA	NA	0	Breast	NA	NA	8.73221	16.1262	1340.63	0.693729	0.0784	0.5029	0.5813	0.586147	9.68024	primary	SL
GSE46928	GPL96	GSM1141318	NA	NA	Positive	NA	NA	NA	NA	NA	0	Breast	NA	NA	8.79899	236.21	783.599	0.728489	0.0784	0.4243	0.5027	0.435506	9.49607	primary	SL
GSE5327	GPL96	GSM120649	Negative	NA	NA	NA	NA	NA	136.066	NA	0	NA	NA	NA	8.97101	871.76	1591.51	0.568129	0.2256	0.5803	0.8058	0.181553	8.90741	primary	MSL
GSE5327	GPL96	GSM120651	Negative	NA	NA	NA	NA	NA	88.3279	NA	0	NA	NA	NA	9.07027	1194.68	2445.25	0.418242	0.1998	0.8847	1.0846	0.436167	9.36772	primary	MSL
GSE5327	GPL96	GSM120657	Negative	NA	NA	NA	NA	NA	61.082	NA	0	NA	NA	NA	8.78056	573.694	2044.05	0.549324	0.0466	0.8197	0.8662	0.682683	9.8088	primary	IM
GSE5327	GPL96	GSM120658	Negative	NA	NA	NA	NA	NA	122.656	NA	0	NA	NA	NA	8.46271	-9.79298	2434.98	0.572719	0.04	0.8749	0.9149	0.781802	9.79182	primary	IM
GSE5327	GPL96	GSM120660	Negative	NA	NA	NA	NA	NA	116.459	NA	0	NA	NA	NA	8.67038	486.734	1056.28	0.67378	0.0905	0.3297	0.4202	0.512486	9.99958	primary	SL
GSE5327	GPL96	GSM120666	Negative	NA	NA	NA	NA	NA	87.4754	NA	0	NA	NA	NA	8.56445	198.153	2260.36	0.568703	0.0816	0.8207	0.9023	0.530424	8.91788	primary	IM
GSE5327	GPL96	GSM120669	Negative	NA	NA	NA	NA	NA	96.2295	NA	0	NA	NA	NA	9.19296	1494.54	1798.09	0.463986	0.2828	0.5718	0.8546	0.279836	8.87465	primary	MSL
GSE5327	GPL96	GSM120670	Negative	NA	NA	NA	NA	NA	70.5574	NA	0	NA	NA	NA	8.81323	407.856	1510.01	0.632122	0.1266	0.7419	0.8685	0.415307	8.69621	primary	LAR
GSE5327	GPL96	GSM120672	Negative	NA	NA	NA	NA	NA	127.738	NA	0	NA	NA	NA	8.69253	623.928	946.497	0.670802	0.2976	0.5142	0.8118	0.39154	9.09256	primary	SL
GSE5327	GPL96	GSM120675	Negative	NA	NA	NA	NA	NA	119.443	NA	0	NA	NA	NA	8.96478	877.099	1792.48	0.542949	0.1809	0.4865	0.6674	0.446911	9.91003	primary	SL
GSE5327	GPL96	GSM120677	Negative	NA	NA	NA	NA	NA	68.3607	NA	0	NA	NA	NA	8.36069	-659.588	1110.65	0.783077	0.0316	0.3926	0.4242	0.678095	9.73248	primary	SL
GSE5327	GPL96	GSM120680	Negative	NA	NA	NA	NA	NA	103.279	NA	0	NA	NA	NA	8.73878	564.152	906.725	0.681567	0.1097	0.3655	0.4752	0.504549	9.59441	primary	SL
GSE5327	GPL96	GSM120682	Negative	NA	NA	NA	NA	NA	76.3279	NA	0	NA	NA	NA	8.73267	722.879	2284.33	0.500681	0.044	0.7625	0.8065	0.623108	9.55177	primary	IM
GSE5327	GPL96	GSM120683	Negative	NA	NA	NA	NA	NA	126.853	NA	0	NA	NA	NA	8.55822	387.103	2557.46	0.50862	0.1051	0.8911	0.9962	0.644189	9.66969	primary	IM
GSE5327	GPL96	GSM120684	Negative	NA	NA	NA	NA	NA	131.148	NA	0	NA	NA	NA	8.30786	-996.521	-8.80639	0.897196	0.1262	0.2917	0.418	0.678693	9.49777	primary	SL
GSE5327	GPL96	GSM120686	Negative	NA	NA	NA	NA	NA	80.8525	NA	0	NA	NA	NA	8.37011	-251.939	-768.645	0.898183	0.1907	0.2729	0.4636	0.499464	8.68621	primary	SL
GSE5327	GPL96	GSM120688	Negative	NA	NA	NA	NA	NA	130.098	NA	0	NA	NA	NA	8.82	492.301	1499.97	0.623621	0.1189	0.4545	0.5734	0.552166	9.71631	primary	SL
GSE5327	GPL96	GSM120689	Negative	NA	NA	NA	NA	NA	60	NA	0	NA	NA	NA	9.36464	1447.9	2300.64	0.403709	0.2849	0.8169	1.1018	0.147056	8.49677	primary	MSL
GSE5327	GPL96	GSM120690	Negative	NA	NA	NA	NA	NA	87.8361	NA	0	NA	NA	NA	8.74636	915.067	2472.56	0.451589	0.1596	0.8399	0.9995	0.394309	9.22198	primary	IM
GSE5327	GPL96	GSM120691	Negative	NA	NA	NA	NA	NA	102.787	NA	0	NA	NA	NA	8.25112	705.635	1593.98	0.587731	0.1886	0.6197	0.8082	0.293084	9.46754	primary	MSL
GSE5327	GPL96	GSM120692	Negative	NA	NA	NA	NA	NA	88.623	NA	0	NA	NA	NA	8.57447	128.941	1031.22	0.714221	0.1215	0.5484	0.6699	0.565464	9.86819	primary	SL
GSE5327	GPL96	GSM120695	Negative	NA	NA	NA	NA	NA	89.8688	NA	0	NA	NA	NA	8.65289	98.0614	1283.48	0.691103	0.1348	0.3901	0.5249	0.619515	9.89735	primary	SL
GSE5327	GPL96	GSM120696	Negative	NA	NA	NA	NA	NA	151.508	NA	0	NA	NA	NA	8.44405	-238.492	138.544	0.830765	0.1691	0.2735	0.4426	0.519819	9.68229	primary	SL
GSE5327	GPL96	GSM120698	Negative	NA	NA	NA	NA	NA	61.4754	NA	0	NA	NA	NA	8.65534	476.522	1939.72	0.573796	0.168	0.6395	0.8075	0.682148	9.95984	primary	SL
GSE5327	GPL96	GSM120699	Negative	NA	NA	NA	NA	NA	79.7377	NA	0	NA	NA	NA	8.33983	-190.761	912.391	0.757766	0.1918	0.4561	0.6479	0.731629	10.0795	primary	SL
GSE5327	GPL96	GSM120701	Negative	NA	NA	NA	NA	NA	68.9836	NA	0	NA	NA	NA	8.54925	-51.0062	1895.97	0.640377	0.0687	0.6343	0.703	0.560644	9.41914	primary	IM
GSE5327	GPL96	GSM120703	Negative	NA	NA	NA	NA	NA	91.2131	NA	0	NA	NA	NA	8.65299	1020.89	2041.34	0.493674	0.158	0.7572	0.9152	0.43789	9.49017	primary	IM
GSE5327	GPL96	GSM120705	Negative	NA	NA	NA	NA	NA	82.918	NA	0	NA	NA	NA	8.48448	-153.421	711.335	0.773227	0.1043	0.372	0.4763	0.659	9.71114	primary	SL
GSE5327	GPL96	GSM120706	Negative	NA	NA	NA	NA	NA	102.164	NA	0	NA	NA	NA	8.84453	1046.41	1987.04	0.497343	0.1796	0.6759	0.8555	0.431658	9.67168	primary	SL
GSE7390	GPL96	GSM177885	Negative	NA	NA	0	1	31.2333	24.1	1	0	Breast	57	3	8.96183	0.1476	0.5112	0.6588	281.849	331.439	0.768047	0.459673	9.61063	primary	LAR
GSE7390	GPL96	GSM177886	Positive	NA	NA	0	1	219.7	6.1	0	0	Breast	57	3	8.16503	0.0292	0.9057	0.9349	-23.3274	2110.41	0.612682	0.842183	10.2498	primary	IM
GSE7390	GPL96	GSM177887	Negative	NA	NA	0	1	30.7333	17.4667	1	0	Breast	48	3	9.02744	0.1476	0.5535	0.7011	1074.43	1288.48	0.58019	0.405906	9.57248	primary	SL
GSE7390	GPL96	GSM177888	Positive	NA	NA	0	1	208.5	73.0667	1	0	Breast	42	3	8.75476	0.0316	1.1769	1.2085	484.959	2885.37	0.453852	0.656581	9.86307	primary	IM
GSE7390	GPL96	GSM177889	Positive	NA	NA	0	1	137.767	127.4	1	0	Breast	46	2	8.67499	0.0831	0.4822	0.5653	83.7442	311.008	0.788191	0.434245	9.24466	primary	LAR
GSE7390	GPL96	GSM177891	Negative	NA	NA	0	1	198.233	23.6333	0	0	Breast	44	3	8.57015	0.0298	0.5369	0.5666	85.5382	1602.37	0.657913	0.661815	10.6555	primary	SL
GSE7390	GPL96	GSM177892	Positive	NA	NA	0	1	193.867	193.867	1	0	Breast	58	1	9.19092	0.2971	0.6599	0.957	1313.43	1790.59	0.488331	0.352771	9.0143	primary	MSL
GSE7390	GPL96	GSM177894	Positive	NA	NA	0	1	49.4667	14.0667	1	0	Breast	38	2	9.16387	0.2044	0.5503	0.7546	852.745	1358	0.598236	0.396623	9.48732	primary	MSL
GSE7390	GPL96	GSM177898	Negative	NA	NA	0	1	145.733	94.7	1	0	Breast	57	2	8.98844	0.106	0.8836	0.9896	563.472	2028.1	0.552529	0.45347	8.8539	primary	MSL
GSE7390	GPL96	GSM177899	Negative	NA	NA	0	1	32.5667	15.2667	1	0	Breast	33	3	8.42636	0.0796	1.0983	1.1779	125.321	2664.85	0.528	0.82963	10.0955	primary	IM
GSE7390	GPL96	GSM177901	Negative	NA	NA	0	1	22.2333	9.4	1	0	Breast	38	3	8.82079	0.1147	0.4995	0.6142	572.625	1346.67	0.631959	0.57159	9.80294	primary	SL
GSE7390	GPL96	GSM177907	Positive	NA	NA	0	1	188.7	186.6	0	0	Breast	46	2	8.85031	0.1288	0.6367	0.7655	300.209	1799.63	0.611201	0.563244	8.82295	primary	MSL
GSE7390	GPL96	GSM177909	Negative	NA	NA	0	1	55.8	4.03333	1	0	Breast	58	3	8.65732	0.0524	1.093	1.1454	506.539	2753.3	0.468244	0.814198	9.96519	primary	IM
GSE7390	GPL96	GSM177912	Positive	NA	NA	0	1	185.7	47.6333	0	0	Breast	43	1	8.7876	0.1088	0.3698	0.4786	20.3532	149.365	0.808087	0.418067	8.50793	primary	SL
GSE7390	GPL96	GSM177916	Positive	NA	NA	0	1	155.067	55.5333	0	0	Breast	47	2	8.46301	0.0638	0.4981	0.5618	-364.782	947.216	0.770939	0.651629	9.58891	primary	LAR
GSE7390	GPL96	GSM177920	Positive	NA	NA	0	1	42.5	11.6667	1	0	Breast	34	3	8.82099	0.1067	0.4073	0.514	128.803	284.34	0.786527	0.502666	9.60206	primary	LAR
GSE7390	GPL96	GSM177929	Positive	NA	NA	0	1	58.4667	34.1	1	0	Breast	42	3	8.82335	0.0922	0.889	0.9812	608.292	2262.34	0.517934	0.610534	9.96419	primary	LAR
GSE7390	GPL96	GSM177935	Negative	NA	NA	0	1	26.4667	14.0333	1	0	Breast	37	3	8.65774	0.0538	0.6874	0.7412	516.27	1832.87	0.581834	0.594992	9.87226	primary	SL
GSE7390	GPL96	GSM177936	Positive	NA	NA	0	1	187.067	28	0	0	Breast	51	2	8.90157	0.1732	0.8101	0.9833	804.713	1898.04	0.538854	0.437719	8.87554	primary	MSL
GSE7390	GPL96	GSM177937	Negative	NA	NA	0	1	110.867	104.033	0	0	Breast	53	3	8.82637	0.03	1.0854	1.1154	795.856	2785.87	0.425988	0.668885	10.0801	primary	IM
GSE7390	GPL96	GSM177940	Positive	NA	NA	0	1	174.6	53.6333	0	0	Breast	39	2	8.43662	0.029	0.6683	0.6973	106.54	1196.24	0.699413	0.454405	8.63518	primary	LAR
GSE7390	GPL96	GSM177944	Positive	NA	NA	0	1	118.5	60.4333	0	0	Breast	52	2	7.69959	0.1142	0.5461	0.6603	118.952	1074.18	0.710826	0.424677	9.88014	primary	SL
GSE7390	GPL96	GSM177945	Positive	NA	NA	0	1	181.1	128.433	0	0	Breast	50	2	8.87288	0.1371	0.5771	0.7142	443.036	1332.78	0.648141	0.413582	9.57002	primary	LAR
GSE7390	GPL96	GSM177946	Positive	NA	NA	0	1	174.267	84.5333	0	0	Breast	36	3	8.60342	0.1401	0.3967	0.5368	-84.9923	281.315	0.80578	0.686574	10.036	primary	LAR
GSE7390	GPL96	GSM177947	Positive	NA	NA	0	1	177.2	103.1	0	0	Breast	45	2	9.0568	0.3183	0.3378	0.6561	1100.18	1019.42	0.608903	0.367187	9.00093	primary	MSL
GSE7390	GPL96	GSM177949	Positive	NA	NA	0	1	167.067	124.167	0	0	Breast	39	3	8.79667	0.1826	0.7355	0.9181	544.153	1552.08	0.61162	0.505188	9.51406	primary	LAR
GSE7390	GPL96	GSM177954	Negative	NA	NA	0	1	34.9667	26.7667	1	0	Breast	37	2	8.5507	0.1135	0.6855	0.799	276.463	1473.67	0.651007	0.741759	10.2735	primary	SL
GSE7390	GPL96	GSM177956	Negative	NA	NA	0	1	30.9667	17.6667	1	0	Breast	40	3	8.81749	0.2691	1.0327	1.3018	1601.77	2812.85	0.312472	0.506195	9.66391	primary	IM
GSE7390	GPL96	GSM177958	Positive	NA	NA	0	1	71.6	57.3667	1	0	Breast	49	3	8.92948	0.1571	0.6938	0.851	1113.66	1831.37	0.508561	0.488464	9.72724	primary	LAR
GSE7390	GPL96	GSM177960	Positive	NA	NA	0	1	81.7667	41.9667	1	0	Breast	44	2	8.75868	0.0968	0.6671	0.7639	586.509	1249.52	0.641384	0.599147	9.8182	primary	LAR
GSE7390	GPL96	GSM177961	Positive	NA	NA	0	1	147.933	44.8333	0	0	Breast	48	2	9.10986	0.1756	0.5194	0.695	911.381	1355.38	0.591627	0.310769	8.72479	primary	MSL
GSE7390	GPL96	GSM177965	Positive	NA	NA	0	1	130	84.5333	0	0	Breast	39	2	9.02157	0.2414	0.3661	0.6076	647.31	222.993	0.743346	0.346559	8.74089	primary	MSL
GSE7390	GPL96	GSM177971	Negative	NA	NA	0	1	126.667	103.1	0	0	Breast	38	2	8.70697	0.1108	0.7981	0.9089	452.834	2406.78	0.519316	0.641121	9.63848	primary	IM
GSE7390	GPL96	GSM177973	Positive	NA	NA	0	1	34.3	21.6333	1	0	Breast	60	3	8.65574	0.0752	0.5406	0.6158	145.727	947.412	0.721073	0.617642	9.88456	primary	LAR
GSE7390	GPL96	GSM177975	Negative	NA	NA	0	1	99.5	56.4333	1	0	Breast	46	3	8.67031	0.0424	0.9095	0.9518	208.813	1994.41	0.59912	0.740223	10.1962	primary	SL
GSE7390	GPL96	GSM177976	Negative	NA	NA	0	1	153.433	124.167	0	0	Breast	47	2	9.01665	0.1636	0.5766	0.7402	596.949	767.016	0.692966	0.461107	9.00716	primary	MSL
GSE7390	GPL96	GSM177979	Negative	NA	NA	0	1	98.8333	85.3667	1	0	Breast	39	3	8.77748	0.1218	0.858	0.9798	826.173	2368.39	0.476688	0.65277	9.89005	primary	IM
GSE7390	GPL96	GSM177982	Negative	NA	NA	0	1	63.9333	38.0333	1	0	Breast	47	2	8.82725	0.2596	0.468	0.7276	87.0586	1166.58	0.704551	0.48258	9.03924	primary	MSL
GSE7390	GPL96	GSM177983	Positive	NA	NA	0	1	70.3667	33.2	1	0	Breast	54	2	8.75319	0.1252	0.5037	0.629	252.963	529.802	0.75188	0.512857	9.6102	primary	LAR
GSE7390	GPL96	GSM177993	Negative	NA	NA	0	1	13.7667	8.96667	1	0	Breast	38	2	8.48324	0.2272	0.4473	0.6745	312.347	323.175	0.765953	0.505765	9.12531	primary	SL
GSE7390	GPL96	GSM177998	Positive	NA	NA	0	1	106.9	48.8333	1	0	Breast	50	2	9.13716	0.2362	0.447	0.6832	982.571	1017.89	0.622681	0.307286	9.13579	primary	MSL
GSE7390	GPL96	GSM177999	Negative	NA	NA	0	1	16.3667	13.1333	1	0	Breast	43	2	8.76231	0.1782	0.4204	0.5986	-300.257	640.576	0.793083	0.583231	9.53687	primary	SL
GSE7390	GPL96	GSM178000	Positive	NA	NA	0	1	275.033	117.067	0	0	Breast	24	2	9.25673	0.2138	0.4701	0.6839	1135.46	727.841	0.638308	0.283085	9.27574	primary	MSL
GSE7390	GPL96	GSM178003	Negative	NA	NA	0	1	96.4	96.4	1	0	Breast	43	3	8.82613	0.0618	0.7343	0.7961	58.6772	2141.45	0.599484	0.602413	9.67996	primary	SL
GSE7390	GPL96	GSM178007	Positive	NA	NA	0	1	178.633	50.6667	0	0	Breast	43	2	9.01586	0.256	0.9051	1.1611	1649.6	2133.42	0.399074	0.383388	8.82895	primary	MSL
GSE7390	GPL96	GSM178009	Negative	NA	NA	0	1	21.4	9.23333	1	0	Breast	53	3	9.10606	0.2374	0.7041	0.9414	1279.32	1596.2	0.51732	0.269371	9.47896	primary	SL
GSE7390	GPL96	GSM178011	Positive	NA	NA	0	1	213.3	165.733	0	0	Breast	38	NA	8.90014	0.0942	0.9078	1.0021	483.129	2549.17	0.49749	0.573349	9.50214	primary	SL
GSE7390	GPL96	GSM178016	Positive	NA	NA	0	1	177.9	140.4	1	0	Breast	40	2	9.239	0.1759	0.6702	0.8461	1452.52	1825.2	0.465923	0.189571	8.42661	primary	MSL
GSE7390	GPL96	GSM178018	Positive	NA	NA	0	1	56.7667	56.7667	1	0	Breast	45	2	8.2633	0.0313	0.3379	0.3692	-685.661	-466.957	0.906534	0.634916	9.47844	primary	LAR
GSE7390	GPL96	GSM178025	Positive	NA	NA	0	1	60.1	26.8333	1	0	Breast	43	2	8.36843	0.146	0.5199	0.6659	-235.44	391.635	0.809254	0.620287	10.0053	primary	LAR
GSE7390	GPL96	GSM178030	Positive	NA	NA	0	1	121.667	78.3	1	0	Breast	56	2	9.0276	0.1093	0.5799	0.6892	993.038	1232.94	0.596442	0.334062	8.96145	primary	MSL
GSE7390	GPL96	GSM178044	Negative	NA	NA	0	1	185.033	7.73333	0	0	Breast	46	2	9.01259	0.1045	0.5035	0.608	466.493	1412.99	0.636477	0.472782	9.25538	primary	LAR
GSE7390	GPL96	GSM178046	Positive	NA	NA	0	1	209.833	24.0667	0	0	Breast	44	2	8.88943	0.2106	0.5239	0.7345	951.225	1009.32	0.627255	0.346128	9.27464	primary	MSL
GSE7390	GPL96	GSM178051	Positive	NA	NA	0	1	99.0667	32.2	1	0	Breast	53	2	9.20624	0.212	0.6289	0.8409	995.757	1327.16	0.584961	0.238224	8.42999	primary	MSL
GSE7390	GPL96	GSM178053	Positive	NA	NA	0	1	303.6	61.9	0	0	Breast	33	2	8.62165	0.1152	0.565	0.6802	-200.001	1243.69	0.726082	0.628405	9.42563	primary	LAR
GSE7390	GPL96	GSM178054	Positive	NA	NA	0	1	181.5	145.1	1	0	Breast	42	1	9.25358	0.3302	0.8555	1.1856	1264.8	1857.02	0.486047	0.266479	8.34553	primary	MSL
GSE7390	GPL96	GSM178060	Positive	NA	NA	0	1	43.6	26.4667	1	0	Breast	24	1	8.70572	0.136	0.5633	0.6993	-54.1662	660.187	0.76873	0.604112	10.0622	primary	LAR
GSE7390	GPL96	GSM178061	Positive	NA	NA	0	1	62.1333	53.2667	1	0	Breast	54	2	8.94374	0.1468	0.7451	0.8919	627.215	2109.27	0.534676	0.456867	8.98046	primary	MSL
GSE7390	GPL96	GSM178070	Positive	NA	NA	0	1	135.067	84.7	0	0	Breast	49	2	8.31889	0.1151	0.5458	0.6609	-236.307	891.995	0.764046	0.541163	8.99676	primary	LAR
GSE7390	GPL96	GSM178071	Positive	NA	NA	0	1	126.067	47.7333	0	0	Breast	43	2	8.77289	0.0902	0.9157	1.0059	478.781	2329.72	0.525714	0.513316	8.77872	primary	IM
GSE7390	GPL96	GSM178074	Positive	NA	NA	0	1	176.133	81.8	1	0	Breast	40	3	8.96143	0.2116	0.4596	0.6712	739.041	688.707	0.686186	0.411432	9.382	primary	LAR
GSE7390	GPL96	GSM178077	Positive	NA	NA	0	1	234.1	232.033	0	0	Breast	45	2	8.87128	0.2099	0.7389	0.9488	812.373	1431.69	0.594309	0.445892	9.28631	primary	MSL
GSE7390	GPL96	GSM178079	Negative	NA	NA	0	1	41.5333	13.4667	1	0	Breast	46	3	8.53859	0.0566	0.5752	0.6318	109.028	1146.14	0.704392	0.69005	10.3132	primary	SL
GSE7390	GPL96	GSM178082	Negative	NA	NA	0	1	59.3667	44.8333	0	0	Breast	39	3	8.60538	0.1248	0.5275	0.6523	772.315	1481.88	0.593113	0.435334	9.67775	primary	SL
GSE7390	GPL96	GSM177890	Positive	NA	NA	0	0	216.9	216.9	0	0	Breast	58	2	9.04616	855.847	1814.55	0.542849	0.2246	0.5603	0.7849	0.346273	8.9286	primary	MSL
GSE7390	GPL96	GSM177897	Negative	NA	NA	0	0	208.3	208.3	0	0	Breast	46	3	8.19477	-553.864	1585.53	0.727296	0.0226	0.5013	0.5239	0.691124	10.0218	primary	SL
GSE7390	GPL96	GSM177904	Positive	NA	NA	0	0	189.767	189.767	0	0	Breast	46	2	8.77998	330.451	871.517	0.709913	0.098	0.36	0.458	0.523122	9.1885	primary	LAR
GSE7390	GPL96	GSM177905	Positive	NA	NA	0	0	194.1	194.1	0	0	Breast	50	2	8.81908	191.4	844.261	0.726893	0.0931	0.4732	0.5663	0.430516	9.16172	primary	LAR
GSE7390	GPL96	GSM177906	Negative	NA	NA	0	0	192.833	192.833	0	0	Breast	46	3	7.888	-2355.36	-842.763	0.990829	0.0262	0.2379	0.2641	0.811801	10.3815	primary	SL
GSE7390	GPL96	GSM177911	Positive	NA	NA	0	0	184.433	184.433	0	0	Breast	49	2	9.14276	1112.01	1017.47	0.607752	0.3117	0.5203	0.832	0.20579	7.75112	primary	MSL
GSE7390	GPL96	GSM177913	Negative	NA	NA	0	0	183.967	183.967	0	0	Breast	47	3	8.82118	296.248	1297.87	0.668218	0.11	0.4649	0.5749	0.603238	10.0089	primary	SL
GSE7390	GPL96	GSM177914	Positive	NA	NA	0	0	179.3	179.3	0	0	Breast	37	3	8.79424	471.839	2758.45	0.472073	0.1148	0.9971	1.1118	0.532758	8.65914	primary	IM
GSE7390	GPL96	GSM177917	Positive	NA	NA	0	0	140.9	140.9	0	0	Breast	46	2	8.26646	-1029.49	-756.891	0.941828	0.059	0.3506	0.4096	0.539238	9.20118	primary	LAR
GSE7390	GPL96	GSM177923	Negative	NA	NA	0	0	178.633	178.633	0	0	Breast	56	3	8.71193	657.491	2975.06	0.419227	0.0438	0.8905	0.9343	0.665011	9.79618	primary	IM
GSE7390	GPL96	GSM177924	Negative	NA	NA	0	0	198.167	198.167	0	0	Breast	35	2	9.12346	766.75	585.434	0.694212	0.2575	0.3211	0.5786	0.253818	8.72204	primary	MSL
GSE7390	GPL96	GSM177925	Negative	NA	NA	0	0	188.367	188.367	0	0	Breast	52	3	8.5825	634.119	1838.17	0.567038	0.1068	0.7656	0.8724	0.655893	10.2513	primary	SL
GSE7390	GPL96	GSM177928	Positive	NA	NA	0	0	189.5	189.5	0	0	Breast	54	2	8.80729	638.303	777.088	0.687504	0.2012	0.257	0.4582	0.315937	8.7931	primary	LAR
GSE7390	GPL96	GSM177930	Positive	NA	NA	0	0	159.7	159.7	0	0	Breast	50	2	9.14522	777.644	989.209	0.649142	0.2632	0.3448	0.608	0.22964	8.14153	primary	MSL
GSE7390	GPL96	GSM177931	Positive	NA	NA	0	0	40.5	40.5	0	0	Breast	42	1	8.79574	301.814	219.443	0.776628	0.1404	0.2584	0.3988	0.37041	8.69083	primary	LAR
GSE7390	GPL96	GSM177932	Positive	NA	NA	0	0	125.967	125.967	0	0	Breast	38	1	8.87555	75.3074	229.201	0.796274	0.1761	0.3817	0.5578	0.390367	9.01019	primary	LAR
GSE7390	GPL96	GSM177933	Positive	NA	NA	0	0	176.867	176.867	0	0	Breast	37	3	8.56996	278.846	941.352	0.708025	0.0484	0.4099	0.4584	0.568129	9.38291	primary	LAR
GSE7390	GPL96	GSM177941	Positive	NA	NA	0	0	170.033	18.2	0	0	Breast	47	2	8.51068	-319.077	185.374	0.833513	0.2412	0.3487	0.5899	0.4882	8.8572	primary	LAR
GSE7390	GPL96	GSM177942	Positive	NA	NA	0	0	93.6333	117.5	0	0	Breast	42	3	8.63991	259.817	2187.79	0.570019	0.0472	0.6397	0.6869	0.637249	9.62202	primary	IM
GSE7390	GPL96	GSM177943	Negative	NA	NA	0	0	109.867	28.4667	0	0	Breast	39	2	8.74254	450.856	1732.61	0.601439	0.1212	0.4753	0.5965	0.554942	9.73877	primary	SL
GSE7390	GPL96	GSM177948	Positive	NA	NA	0	0	164.167	164.833	0	0	Breast	50	1	8.92474	804.007	1236.86	0.61803	0.1246	0.539	0.6636	0.399004	8.55513	primary	MSL
GSE7390	GPL96	GSM177950	Positive	NA	NA	0	0	154.733	69.4333	0	0	Breast	44	1	8.7269	290.345	729.434	0.728492	0.1635	0.2895	0.453	0.359743	8.48259	primary	LAR
GSE7390	GPL96	GSM177951	Positive	NA	NA	0	0	110.367	81.3667	0	0	Breast	50	1	8.92594	1035.34	1993.93	0.497875	0.2598	0.645	0.9048	0.297105	8.39168	primary	MSL
GSE7390	GPL96	GSM177952	Positive	NA	NA	0	0	162.1	50.6667	0	0	Breast	51	2	8.87464	1101.36	973.294	0.614123	0.2708	0.4832	0.754	0.361745	9.03094	primary	MSL
GSE7390	GPL96	GSM177955	Positive	NA	NA	0	0	70.1667	7.73333	0	0	Breast	51	2	9.00222	679.301	1200.31	0.636463	0.1666	0.473	0.6396	0.38236	9.00917	primary	LAR
GSE7390	GPL96	GSM177957	Positive	NA	NA	0	0	161	61.9	0	0	Breast	44	1	8.8309	466.225	1447.98	0.632538	0.1932	0.5798	0.773	0.565833	8.95249	primary	MSL
GSE7390	GPL96	GSM177963	Positive	NA	NA	0	0	58	58	0	0	Breast	45	3	8.7057	734.837	2071.94	0.525929	0.1225	0.6829	0.8054	0.619246	9.76959	primary	SL
GSE7390	GPL96	GSM177966	Negative	NA	NA	0	0	51.8	51.8	0	0	Breast	40	3	8.79906	478.588	1012.97	0.679342	0.134	0.4401	0.5741	0.49183	9.97112	primary	SL
GSE7390	GPL96	GSM177967	Positive	NA	NA	0	0	118.133	118.133	0	0	Breast	38	3	8.78419	313.123	607.265	0.738408	0.1609	0.3959	0.5568	0.378553	8.82203	primary	LAR
GSE7390	GPL96	GSM177969	Positive	NA	NA	0	0	125.7	125.7	0	0	Breast	43	2	8.83724	469.121	1097.74	0.671189	0.1453	0.3455	0.4908	0.332349	9.12534	primary	LAR
GSE7390	GPL96	GSM177970	Negative	NA	NA	0	0	109.767	109.767	0	0	Breast	47	3	8.48602	3.80482	2278.72	0.58976	0.0072	0.8566	0.8638	0.684451	10.1345	primary	SL
GSE7390	GPL96	GSM177978	Negative	NA	NA	0	0	156.033	156.033	0	0	Breast	47	3	8.40228	474.223	2740.22	0.474122	0.0999	1.0629	1.1628	0.847925	10.2154	primary	IM
GSE7390	GPL96	GSM177980	Negative	NA	NA	0	0	153.2	153.2	0	0	Breast	32	3	8.44808	-85.6314	347.587	0.800037	0.115	0.3365	0.4514	0.686482	10.3311	primary	SL
GSE7390	GPL96	GSM177984	Positive	NA	NA	0	0	144.233	144.233	0	0	Breast	54	1	8.67958	199.358	86.9962	0.797883	0.2479	0.2051	0.453	0.395437	8.15317	primary	MSL
GSE7390	GPL96	GSM177988	Positive	NA	NA	0	0	89.0667	89.0667	0	0	Breast	43	3	7.68282	91.7803	3460.06	0.429953	0	1.4	1.4	0.814736	9.27771	primary	IM
GSE7390	GPL96	GSM177990	Positive	NA	NA	0	0	53.0333	53.0333	0	0	Breast	50	1	8.87966	709.801	1186.5	0.634572	0.1374	0.4973	0.6346	0.497148	9.19583	primary	LAR
GSE7390	GPL96	GSM177991	Positive	NA	NA	0	0	64	64	0	0	Breast	43	1	8.87239	320.464	283.844	0.76889	0.2344	0.2365	0.4709	0.353313	8.38348	primary	MSL
GSE7390	GPL96	GSM177992	Positive	NA	NA	0	0	88.2333	88.2333	0	0	Breast	49	2	8.94539	361.355	270.966	0.766255	0.14	0.3422	0.4822	0.367105	9.08918	primary	LAR
GSE7390	GPL96	GSM177994	Negative	NA	NA	0	0	43	43	0	0	Breast	47	2	8.71181	649.796	1037.15	0.658019	0.2261	0.4109	0.637	0.34726	8.94716	primary	SL
GSE7390	GPL96	GSM177997	Positive	NA	NA	0	0	167.833	167.833	0	0	Breast	51	2	9.32174	1332.57	2155.17	0.438428	0.2128	0.6371	0.8499	0.247043	8.86745	primary	MSL
GSE7390	GPL96	GSM178001	Positive	NA	NA	0	0	84.9667	84.9667	0	0	Breast	40	3	8.43848	-306.505	424.9	0.812501	0.0879	0.2724	0.3603	0.636512	10.1484	primary	SL
GSE7390	GPL96	GSM178002	Positive	NA	NA	0	0	136.167	136.167	0	0	Breast	56	2	9.06392	1026.27	2363.29	0.451336	0.1945	0.8013	0.9957	0.311454	8.57209	primary	MSL
GSE7390	GPL96	GSM178005	Positive	NA	NA	0	0	180.2	180.2	0	0	Breast	54	1	8.97854	932.833	1053.16	0.624342	0.2202	0.4728	0.693	0.387595	9.67891	primary	LAR
GSE7390	GPL96	GSM178012	Positive	NA	NA	0	0	189.433	189.433	0	0	Breast	38	3	8.48367	-185.921	2352.02	0.603474	0.0283	0.7632	0.7915	0.768647	10.2013	primary	IM
GSE7390	GPL96	GSM178013	Negative	NA	NA	0	0	208	208	0	0	Breast	40	3	8.42193	-324.877	133.039	0.838197	0.0781	0.3212	0.3992	0.699679	10.5672	primary	SL
GSE7390	GPL96	GSM178014	Positive	NA	NA	0	0	205.367	205.367	0	0	Breast	38	2	8.67758	557.145	1154.75	0.655257	0.1162	0.507	0.6232	0.526666	9.3363	primary	LAR
GSE7390	GPL96	GSM178017	Negative	NA	NA	0	0	166	166	0	0	Breast	56	3	8.39814	-336.457	-283.084	0.870762	0.0998	0.3745	0.4743	0.668912	9.78473	primary	LAR
GSE7390	GPL96	GSM178019	Positive	NA	NA	0	0	167.133	167.133	0	0	Breast	46	2	8.98355	562.704	814.103	0.691606	0.1434	0.2839	0.4273	0.301825	8.94959	primary	MSL
GSE7390	GPL96	GSM178021	Negative	NA	NA	0	0	290.367	290.367	0	0	Breast	33	3	8.36299	166.552	2368.81	0.559388	0.0204	0.683	0.7034	0.899532	10.3143	primary	IM
GSE7390	GPL96	GSM178022	Negative	NA	NA	0	0	155.733	155.733	0	0	Breast	37	3	8.75302	633.54	2251.75	0.516092	0.1349	0.7583	0.8932	0.497035	9.08018	primary	LAR
GSE7390	GPL96	GSM178023	Negative	NA	NA	0	0	231.433	231.433	0	0	Breast	42	3	8.34834	-40.1937	2456.98	0.57373	0.1116	0.8077	0.9193	0.77946	10.0126	primary	IM
GSE7390	GPL96	GSM178024	Positive	NA	NA	0	0	204.5	204.5	0	0	Breast	47	3	8.71465	-300.471	-263.472	0.866721	0.0711	0.2231	0.2943	0.388171	8.15402	primary	MSL
GSE7390	GPL96	GSM178026	Positive	NA	NA	0	0	197.233	197.233	0	0	Breast	44	3	8.58028	158.833	254.916	0.786472	0.1246	0.4144	0.539	0.504828	9.44411	primary	LAR
GSE7390	GPL96	GSM178027	Positive	NA	NA	0	0	196.967	196.967	0	0	Breast	54	2	9.2525	1534.44	2502.57	0.364619	0.2856	0.7712	1.0568	0.20501	8.9198	primary	MSL
GSE7390	GPL96	GSM178029	Positive	NA	NA	0	0	195.333	195.333	0	0	Breast	42	2	9.07756	1005.66	920.77	0.631147	0.2156	0.4245	0.6402	0.160822	8.40356	primary	MSL
GSE7390	GPL96	GSM178032	Positive	NA	NA	0	0	192.633	192.633	0	0	Breast	58	3	8.88175	1009.31	509.027	0.676452	0.3146	0.2585	0.5731	0.256965	7.92439	primary	MSL
GSE7390	GPL96	GSM178033	Positive	NA	NA	0	0	190.767	190.767	0	0	Breast	58	2	9.17562	858.545	497.045	0.693852	0.2313	0.3633	0.5946	0.172633	8.1683	primary	MSL
GSE7390	GPL96	GSM178034	Positive	NA	NA	0	0	190.467	190.467	0	0	Breast	32	2	8.41299	214.694	2564.78	0.529333	0.054	0.7857	0.8398	0.930356	10.6	primary	IM
GSE7390	GPL96	GSM178035	Positive	NA	NA	0	0	188.433	188.433	0	0	Breast	50	3	8.77252	252.001	1339.39	0.668516	0.1388	0.4333	0.572	0.608993	9.84709	primary	SL
GSE7390	GPL96	GSM178037	Positive	NA	NA	0	0	189.267	189.267	0	0	Breast	47	1	8.6887	486.521	1909	0.576284	0.1219	0.6594	0.7813	0.436816	9.00691	primary	LAR
GSE7390	GPL96	GSM178040	Positive	NA	NA	0	0	186.733	186.733	0	0	Breast	48	2	8.8914	910.104	1688.61	0.551656	0.2252	0.6437	0.869	0.365931	8.65056	primary	LAR
GSE7390	GPL96	GSM178041	Positive	NA	NA	0	0	192.267	192.267	0	0	Breast	56	2	9.1372	1303.72	1331.6	0.547167	0.2491	0.5124	0.7615	0.256155	8.72067	primary	MSL
GSE7390	GPL96	GSM178042	Positive	NA	NA	0	0	189.467	189.467	0	0	Breast	51	2	8.8892	646.087	1125.38	0.648626	0.1511	0.5003	0.6514	0.289025	8.88118	primary	LAR
GSE7390	GPL96	GSM178043	Positive	NA	NA	0	0	184.333	184.333	0	0	Breast	44	3	9.10562	912.331	1143.64	0.616285	0.1934	0.4371	0.6305	0.200606	8.34159	primary	MSL
GSE7390	GPL96	GSM178045	Positive	NA	NA	0	0	211.733	211.733	0	0	Breast	36	1	9.19325	1406.22	2550.32	0.375591	0.2686	0.8189	1.0874	0.251781	8.70659	primary	MSL
GSE7390	GPL96	GSM178055	Negative	NA	NA	0	0	130.467	130.467	0	0	Breast	51	3	8.14361	693.376	1570.39	0.591981	0.189	0.5051	0.6941	0.339292	9.97981	primary	SL
GSE7390	GPL96	GSM178056	Positive	NA	NA	0	0	172.7	172.7	0	0	Breast	31	3	8.74423	365.019	476.705	0.746146	0.1325	0.315	0.4475	0.394079	9.35709	primary	LAR
GSE7390	GPL96	GSM178057	Positive	NA	NA	0	0	128.5	128.5	0	0	Breast	60	3	8.36993	319.139	2035.03	0.581234	0.0504	0.8057	0.8561	0.637536	9.28776	primary	LAR
GSE7390	GPL96	GSM178058	Positive	NA	NA	0	0	171.867	171.867	0	0	Breast	46	3	8.84645	517.995	1305.24	0.642824	0.1584	0.4358	0.5942	0.49572	10.2348	primary	LAR
GSE7390	GPL96	GSM178059	Negative	NA	NA	0	0	158.133	158.133	0	0	Breast	59	3	8.88113	838.14	1891.73	0.535497	0.1739	0.6581	0.832	0.500402	9.96088	primary	SL
GSE7390	GPL96	GSM178062	Positive	NA	NA	0	0	167.933	167.933	0	0	Breast	55	2	9.26586	1329.47	1741.75	0.492527	0.1328	0.6896	0.8224	0.252002	9.05407	primary	MSL
GSE7390	GPL96	GSM178064	Positive	NA	NA	0	0	151.833	151.833	0	0	Breast	42	3	8.66377	-173.929	564.446	0.788573	0.0888	0.3754	0.4642	0.62994	9.69907	primary	LAR
GSE7390	GPL96	GSM178068	Positive	NA	NA	0	0	139.267	139.267	0	0	Breast	44	3	8.65388	412.723	1491.19	0.633708	0.1154	0.5208	0.6362	0.573388	9.98388	primary	LAR
GSE7390	GPL96	GSM178072	Positive	NA	NA	0	0	116.4	116.4	0	0	Breast	45	1	8.96293	834.504	1790.93	0.54838	0.2496	0.6097	0.8593	0.440398	9.15184	primary	MSL
GSE7390	GPL96	GSM178075	Negative	NA	NA	0	0	95.9667	95.9667	0	0	Breast	48	3	8.41144	333.034	3020.13	0.456097	0.0561	1.2277	1.2838	0.800117	10.1482	primary	IM
GSE7390	GPL96	GSM178076	Positive	NA	NA	0	0	171.233	171.233	0	0	Breast	56	2	9.16756	1627.42	2047.59	0.413559	0.3163	0.6445	0.9608	0.20824	8.71968	primary	MSL
GSE7390	GPL96	GSM178078	Negative	NA	NA	0	0	189.1	189.1	0	0	Breast	39	3	8.36229	-421.385	996.919	0.771584	0.0608	0.2535	0.3143	0.751314	10.3531	primary	SL
GSE76124	GPL570	GSM1974566	Negative	Negative	Negative	1	NA	NA	NA	NA	0	NA	NA	NA	8.99242	1518.35	3201.23	0.26965	0.169	1.1605	1.3295	0.466421	9.38106	primary	IM
GSE76124	GPL570	GSM1974567	Negative	Negative	Negative	0	NA	NA	NA	NA	0	NA	41	3	8.481	-152.21	1844.49	0.657429	0.0206	0.4683	0.4889	0.866728	9.97072	primary	IM
GSE76124	GPL570	GSM1974568	Negative	Negative	Negative	0	NA	NA	NA	NA	0	NA	55	3	8.89896	1554.65	1722.18	0.466039	0.4308	0.5325	0.9633	0.0848272	7.97842	primary	MSL
GSE76124	GPL570	GSM1974569	Negative	Negative	Negative	0	NA	NA	NA	NA	0	NA	55	3	9.198	1593.43	1942.48	0.432062	0.3773	0.6937	1.071	0.198814	8.52234	primary	MSL
GSE76124	GPL570	GSM1974578	Negative	Negative	Negative	1	NA	NA	NA	NA	0	NA	54	NA	9.44677	1449.15	2604	0.362411	0.2421	0.8335	1.0756	0.235853	8.94094	primary	MSL
GSE76124	GPL570	GSM1974579	Negative	Negative	Negative	1	NA	NA	NA	NA	0	NA	71	2	9.18734	2183.7	2127.85	0.326808	0.4442	0.7501	1.1944	0.0154346	8.04261	primary	MSL
GSE76124	GPL570	GSM1974581	Negative	Negative	Negative	1	NA	NA	NA	NA	0	NA	51	NA	9.30266	1729.47	2389.73	0.353358	0.3636	0.7894	1.153	0	7.80839	primary	MSL
GSE76124	GPL570	GSM1974582	Negative	Negative	Negative	0	NA	NA	NA	NA	0	NA	64	NA	8.80727	410.574	1632.17	0.617812	0.1347	0.7129	0.8476	0.637773	9.79185	primary	SL
GSE76124	GPL570	GSM1974583	Negative	Negative	Negative	1	NA	NA	NA	NA	0	NA	NA	3	9.15673	1452.72	2901.16	0.320929	0.1322	1.1353	1.2676	0.347684	8.99133	primary	MSL
GSE76124	GPL570	GSM1974584	Negative	Negative	Negative	NA	NA	NA	NA	NA	0	NA	58	NA	8.04657	-1294.45	-605.89	0.947318	0.1204	0.1809	0.3014	0.671877	9.05081	primary	SL
GSE76124	GPL570	GSM1974585	Negative	Negative	Negative	NA	NA	NA	NA	NA	0	NA	64	NA	8.62447	-246.834	651.834	0.787264	0.0929	0.4015	0.4944	0.797686	9.7285	primary	SL
GSE76124	GPL570	GSM1974588	Negative	Negative	Negative	0	NA	NA	NA	NA	0	NA	NA	2	8.76108	782.521	1609.96	0.576649	0.0769	0.6594	0.7363	0.476937	9.50918	primary	SL
GSE76124	GPL570	GSM1974589	Negative	Negative	Negative	0	NA	NA	NA	NA	0	NA	73	3	9.06172	1051.24	1997.91	0.495343	0.2326	0.7283	0.9609	0.370334	9.19489	primary	MSL
GSE76124	GPL570	GSM1974590	Negative	Negative	Negative	NA	NA	NA	NA	NA	0	NA	56	3	9.07436	1487.54	3295	0.260739	0.2311	1.2139	1.445	0.271393	8.27144	primary	IM
GSE76124	GPL570	GSM1974592	Negative	Negative	Negative	NA	NA	NA	NA	NA	0	NA	67	NA	8.66797	30.8336	2357.86	0.577102	0	0.7798	0.7798	0.584042	9.42509	primary	IM
GSE76124	GPL570	GSM1974596	Negative	Negative	Negative	NA	NA	NA	NA	NA	0	NA	49	3	9.01523	2148.44	2156.17	0.32777	0.429	0.7039	1.133	0.00784458	8.52866	primary	MSL
GSE76124	GPL570	GSM1974598	Negative	Negative	Negative	0	NA	NA	NA	NA	0	NA	50	2	8.63481	-688.408	546.7	0.834161	0	0.2697	0.2697	0.703472	9.77067	primary	LAR
GSE76124	GPL570	GSM1974605	Negative	Negative	Negative	NA	NA	NA	NA	NA	0	NA	68	3	7.84131	128.426	3285.64	0.448122	0	1.3253	1.3253	1	9.95316	primary	IM
GSE76124	GPL570	GSM1974606	Negative	Negative	Negative	NA	NA	NA	NA	NA	0	NA	57	3	9.2161	1843.81	2695.5	0.295033	0.2129	1.0579	1.2708	0.278012	9.26052	primary	MSL
GSE76124	GPL570	GSM1974607	Negative	Negative	Negative	0	NA	NA	NA	NA	0	NA	58	3	8.44661	-490.299	1042.87	0.773723	0.0514	0.2463	0.2978	0.844001	9.99287	primary	SL
GSE76124	GPL570	GSM1974608	Negative	Negative	Negative	NA	NA	NA	NA	NA	0	NA	48	3	8.76014	1287.68	3613.72	0.243856	0.0538	1.447	1.5008	0.464971	9.09204	primary	IM
GSE76124	GPL570	GSM1974611	Negative	Negative	Negative	NA	NA	NA	NA	NA	0	NA	39	3	8.87628	738.482	1694.12	0.571827	0.0698	0.7229	0.7927	0.46402	9.57416	primary	SL
GSE76124	GPL570	GSM1974612	Negative	Negative	Negative	1	NA	NA	NA	NA	0	NA	71	3	9.08569	1553.31	2199.12	0.403187	0.2418	0.7584	1.0002	0.247088	9.03149	primary	MSL
GSE76124	GPL570	GSM1974613	Negative	Negative	Negative	0	NA	NA	NA	NA	0	NA	59	3	8.52498	-386.861	1411.82	0.72797	0.0582	0.4948	0.553	0.715192	9.29686	primary	SL
GSE76124	GPL570	GSM1974614	Negative	Negative	Negative	1	NA	NA	NA	NA	0	NA	67	NA	8.45556	-538.455	2006.61	0.681859	0.0089	0.6891	0.698	0.643981	9.63816	primary	IM
GSE76124	GPL570	GSM1974615	Negative	Negative	Negative	1	NA	NA	NA	NA	0	NA	49	3	8.52404	-476.273	849.246	0.790155	0	0.4117	0.4117	0.707929	9.6631	primary	LAR
GSE76124	GPL570	GSM1974618	Negative	Negative	Negative	0	NA	NA	NA	NA	0	NA	70	3	8.47807	-814.999	-28.3029	0.88644	0.0514	0.1599	0.2113	0.690266	9.6465	primary	SL
GSE76124	GPL570	GSM1974619	Negative	Negative	Negative	0	NA	NA	NA	NA	0	NA	75	NA	8.38384	-889.29	-207.384	0.903037	0.0502	0.1631	0.2133	0.79218	9.94423	primary	SL
GSE76124	GPL570	GSM1974623	Negative	Negative	Negative	0	NA	NA	NA	NA	0	NA	48	3	8.8751	910.563	1596.89	0.562779	0.1673	0.5569	0.7242	0.416662	9.27488	primary	SL
GSE76124	GPL570	GSM1974627	Negative	Negative	Negative	1	NA	NA	NA	NA	0	NA	38	3	9.2519	1342.49	1360.72	0.538798	0.4064	0.4675	0.8738	0.0910368	8.05215	primary	MSL
GSE76124	GPL570	GSM1974628	Negative	Negative	Negative	0	NA	NA	NA	NA	0	NA	48	3	8.63706	-84.3922	2088.59	0.622252	0.0903	0.7691	0.8593	0.678963	9.99948	primary	IM
GSE76124	GPL570	GSM1974629	Negative	Negative	Negative	0	NA	NA	NA	NA	0	NA	64	3	8.75919	973.18	2166.62	0.483741	0.169	0.6185	0.7874	0.410833	9.46957	primary	IM
GSE76124	GPL570	GSM1974630	Negative	Negative	Negative	0	NA	NA	NA	NA	0	NA	61	NA	8.84713	367.361	946.113	0.69829	0.067	0.2443	0.3113	0.410351	9.61001	primary	SL
GSE76124	GPL570	GSM1974631	Negative	Negative	Negative	0	NA	NA	NA	NA	0	NA	50	2	8.66457	-368.851	1115.8	0.755335	0.0242	0.2654	0.2896	0.687434	9.84373	primary	SL
GSE76124	GPL570	GSM1974635	Negative	Negative	Negative	1	NA	NA	NA	NA	0	NA	66	1	8.63025	1435.94	2931.45	0.31905	0.3061	1.1199	1.426	0.0869917	7.39959	primary	MSL
GSE76124	GPL570	GSM1974644	Negative	Negative	Negative	NA	NA	NA	NA	NA	0	NA	58	2	9.2308	1154.82	1906.23	0.493824	0.1727	0.6305	0.8032	0.093615	8.02417	primary	MSL
GSE76124	GPL570	GSM1974647	Negative	Negative	Negative	NA	NA	NA	NA	NA	0	NA	45	3	8.37032	-665.838	74.912	0.868689	0.0048	0.2536	0.2584	0.676749	9.92317	primary	LAR
GSE76124	GPL570	GSM1974648	Negative	Negative	Negative	NA	NA	NA	NA	NA	0	NA	48	3	9.18973	1206.11	2496.26	0.409899	0.3504	0.7531	1.1036	0.30949	8.96178	primary	MSL
GSE76124	GPL570	GSM1974650	Negative	Negative	Negative	NA	NA	NA	NA	NA	0	NA	43	3	8.64085	-205.279	252.382	0.818557	0.0746	0.2495	0.3241	0.605606	9.99359	primary	SL
GSE76124	GPL570	GSM1974653	Negative	Negative	Negative	NA	NA	NA	NA	NA	0	NA	76	3	8.4599	-86.8016	1430.37	0.695121	0.0218	0.7231	0.7449	0.688485	9.95114	primary	IM
GSE76124	GPL570	GSM1974654	Negative	Negative	Negative	NA	NA	NA	NA	NA	0	NA	55	3	8.71519	1175.79	3116.03	0.329543	0.1086	1.2476	1.3562	0.549047	9.19543	primary	IM
GSE76124	GPL570	GSM1974656	Negative	Negative	Negative	NA	NA	NA	NA	NA	0	NA	57	3	8.63533	-212.01	1777.24	0.671367	0.0934	0.7649	0.8583	0.595576	9.36022	primary	IM
GSE76124	GPL570	GSM1974657	Negative	Negative	Negative	NA	NA	NA	NA	NA	0	NA	70	2	8.72338	670.542	1749.39	0.573352	0.1997	0.6681	0.8678	0.456743	9.38072	primary	IM
GSE76124	GPL570	GSM1974661	Negative	Negative	Negative	NA	NA	NA	NA	NA	0	NA	38	2	8.48682	-829.443	-367.35	0.909252	0.0301	0.2809	0.311	0.549948	9.47411	primary	SL
GSE76124	GPL570	GSM1974664	Negative	Negative	Negative	NA	NA	NA	NA	NA	0	NA	47	3	8.49091	-474.556	1023.38	0.774072	0.0575	0.5698	0.6273	0.634128	9.90593	primary	SL
GSE76124	GPL570	GSM1974665	Negative	Negative	Negative	NA	NA	NA	NA	NA	0	NA	56	3	8.81027	508.587	1378.92	0.635569	0.0468	0.4673	0.514	0.48026	9.65988	primary	SL
GSE76124	GPL570	GSM1974667	Negative	Negative	Negative	NA	NA	NA	NA	NA	0	NA	72	3	8.47727	-229.767	722.186	0.779287	0.0482	0.3337	0.3818	0.746359	9.86129	primary	SL
GSE76124	GPL570	GSM1974669	Negative	Negative	Negative	NA	NA	NA	NA	NA	0	NA	51	3	8.44198	-860.728	158.085	0.876695	0.0442	0.2472	0.2914	0.759137	10.0945	primary	SL
GSE76124	GPL570	GSM1974670	Negative	Negative	Negative	NA	NA	NA	NA	NA	0	NA	70	3	8.29996	-750.747	1331.55	0.771092	0.021	0.5984	0.6194	0.702373	9.79986	primary	IM
GSE76124	GPL570	GSM1974687	Negative	Negative	Negative	1	NA	NA	NA	NA	0	NA	45	3	8.7768	608.727	1425.95	0.618744	0.1689	0.5362	0.7051	0.553785	9.6398	primary	SL
GSE76124	GPL570	GSM1974692	Negative	Negative	Negative	0	NA	NA	NA	NA	0	NA	53	3	8.55351	381.251	1955.74	0.583284	0.0802	0.7742	0.8544	0.627513	9.59454	primary	IM
GSE76124	GPL570	GSM1974694	Negative	Negative	Negative	0	NA	NA	NA	NA	0	NA	44	3	8.75333	1521.14	1565.2	0.490593	0.5049	0.6158	1.1207	0.0212249	7.66174	primary	MSL
GSE76124	GPL570	GSM1974695	Negative	Negative	Negative	1	NA	NA	NA	NA	0	NA	43	3	8.71571	83.2558	672.266	0.75451	0.0522	0.3985	0.4507	0.679389	9.72689	primary	SL
GSE76124	GPL570	GSM1974697	Negative	Negative	Negative	0	NA	NA	NA	NA	0	NA	80	NA	8.51081	-33.9076	1366.48	0.696281	0.0208	0.6245	0.6453	0.824254	9.85343	primary	IM
GSE76124	GPL570	GSM1974698	Negative	Negative	Negative	NA	NA	NA	NA	NA	0	NA	65	3	8.64663	-134.81	301.243	0.80837	0.055	0.1895	0.2445	0.671783	9.62556	primary	SL
GSE76124	GPL570	GSM1974699	Negative	Negative	Negative	NA	NA	NA	NA	NA	0	NA	46	3	8.99336	1353.73	2537.83	0.384413	0.0872	0.8914	0.9786	0.413525	9.38364	primary	IM
GSE76124	GPL570	GSM1974700	Negative	Negative	Negative	0	NA	NA	NA	NA	0	NA	54	3	8.62276	382.522	1695.5	0.613733	0.0342	0.6247	0.6589	0.748078	9.86579	primary	SL
GSE76124	GPL570	GSM1974701	Negative	Negative	Negative	1	NA	NA	NA	NA	0	NA	51	3	8.39773	-594.382	1130.23	0.775277	0.0196	0.4463	0.4659	0.693115	10.0182	primary	LAR
GSE76124	GPL570	GSM1974702	Negative	Negative	Negative	0	NA	NA	NA	NA	0	NA	46	3	8.30389	-1075.6	387.834	0.875643	0.0357	0.23	0.2658	0.788858	9.95924	primary	SL
GSE76124	GPL570	GSM1974703	Negative	Negative	Negative	1	NA	NA	NA	NA	0	NA	73	3	9.09141	1196.73	1506.08	0.538846	0.276	0.4222	0.6982	0.211887	8.73409	primary	MSL
GSE76124	GPL570	GSM1974707	Negative	Negative	Negative	1	NA	NA	NA	NA	0	NA	51	3	8.65495	-377.284	692.688	0.795306	0.0752	0.3864	0.4616	0.665437	9.74086	primary	SL
GSE76124	GPL570	GSM1974708	Negative	Negative	Negative	0	NA	NA	NA	NA	0	NA	39	3	8.54292	307.428	1443.72	0.650894	0.0445	0.6541	0.6986	0.680136	9.91909	primary	IM
GSE76124	GPL570	GSM1974709	Negative	Negative	Negative	1	NA	NA	NA	NA	0	NA	42	3	8.22088	-559.962	565.141	0.822077	0.0427	0.4185	0.4612	0.971458	10.2273	primary	SL
GSE76124	GPL570	GSM1974710	Negative	Negative	Negative	0	NA	NA	NA	NA	0	NA	54	3	8.57087	-197.066	1268.74	0.723252	0.0396	0.4965	0.5361	0.918684	10.2497	primary	SL
GSE76124	GPL570	GSM1974711	Negative	Negative	Negative	0	NA	NA	NA	NA	0	NA	69	2	8.65543	-371.787	426.465	0.817918	0.016	0.3822	0.3982	0.429136	9.09377	primary	SL
GSE76124	GPL570	GSM1974712	Negative	Negative	Negative	NA	NA	NA	NA	NA	0	NA	75	3	8.6041	404.04	2094.88	0.563814	0.1188	0.7108	0.8296	0.603791	9.80656	primary	IM
GSE76124	GPL570	GSM1974713	Negative	Negative	Negative	0	NA	NA	NA	NA	0	NA	35	3	8.82776	704.428	820.076	0.675785	0.0913	0.4146	0.5059	0.545365	9.67914	primary	SL
GSE76124	GPL570	GSM1974714	Negative	Negative	Negative	1	NA	NA	NA	NA	0	NA	38	3	8.99811	2018.6	2253.97	0.33221	0.5021	0.7576	1.2597	0.0544623	8.003	primary	MSL
GSE76124	GPL570	GSM1974717	Negative	Negative	Negative	1	NA	NA	NA	NA	0	NA	65	3	8.79473	1004.52	2075.85	0.491357	0.3058	0.7899	1.0957	0.418723	8.92318	primary	MSL
GSE76124	GPL570	GSM1974718	Negative	Negative	Negative	NA	NA	NA	NA	NA	0	NA	48	3	8.6462	252.783	1214.19	0.681986	0.0772	0.546	0.6232	0.676716	9.69079	primary	SL
GSE76124	GPL570	GSM1974719	Negative	Negative	Negative	1	NA	NA	NA	NA	0	NA	66	3	8.88673	1515.84	795.143	0.586381	0.5386	0.3633	0.9019	0.0750769	8.02554	primary	MSL
GSE76124	GPL570	GSM1974721	Negative	Negative	Negative	1	NA	NA	NA	NA	0	NA	42	3	8.61706	70.6542	2487.54	0.556607	0.0084	0.9077	0.9161	0.755896	9.82817	primary	IM
GSE76124	GPL570	GSM1974723	Negative	Negative	Negative	NA	NA	NA	NA	NA	0	NA	72	2	8.64475	1251.37	1307.01	0.556584	0.4758	0.5374	1.0132	0.0878714	7.55911	primary	MSL
GSE76124	GPL570	GSM1974724	Negative	Negative	Negative	NA	NA	NA	NA	NA	0	NA	45	3	8.50699	-360.804	856.456	0.77899	0.1272	0.341	0.4682	0.539158	10.1042	primary	LAR
GSE76124	GPL570	GSM1974725	Negative	Negative	Negative	NA	NA	NA	NA	NA	0	NA	75	2	9.03747	857.963	1945.13	0.526389	0.1475	0.6103	0.7578	0.325346	8.9212	primary	MSL
GSE76124	GPL570	GSM1974726	Negative	Negative	Negative	NA	NA	NA	NA	NA	0	NA	67	3	9.00708	1856.36	2815.83	0.276342	0.4821	0.9279	1.41	0.032471	8.00196	primary	MSL
GSE76124	GPL570	GSM1974727	Negative	Negative	Negative	1	NA	NA	NA	NA	0	NA	41	3	8.2225	-826.062	271.419	0.866039	0.068	0.3123	0.3802	0.892813	10.1971	primary	SL
GSE76124	GPL570	GSM1974732	Negative	Negative	Negative	0	NA	NA	NA	NA	0	NA	44	2	8.86589	870.004	2908.6	0.399668	0.2002	1.1921	1.3923	0.631578	9.51251	primary	IM
GSE76124	GPL570	GSM1974739	Negative	Negative	Negative	NA	NA	NA	NA	NA	0	NA	49	2	9.08802	859.735	1329.77	0.600731	0.188	0.6223	0.8103	0.336132	8.50924	primary	LAR
GSE76124	GPL570	GSM1974740	Negative	Negative	Negative	NA	NA	NA	NA	NA	0	NA	76	3	8.56458	181.683	1326.77	0.67752	0.0396	0.3912	0.4308	0.711871	10.1299	primary	SL
GSE76124	GPL570	GSM1974741	Negative	Negative	Negative	NA	NA	NA	NA	NA	0	NA	61	3	9.37741	1673.03	1691.09	0.454664	0.1756	0.6194	0.795	0.0895285	8.51592	primary	MSL
GSE76124	GPL570	GSM1974744	Negative	Negative	Negative	NA	NA	NA	NA	NA	0	NA	46	3	8.94598	699.679	2078.74	0.529465	0.1367	0.6867	0.8234	0.530391	9.563	primary	SL
GSE76124	GPL570	GSM1974745	Negative	Negative	Negative	NA	NA	NA	NA	NA	0	NA	51	3	8.86779	569.572	491.384	0.724338	0.265	0.3248	0.5898	0.323389	9.10734	primary	SL
GSE76124	GPL570	GSM1974747	Negative	Negative	Negative	NA	NA	NA	NA	NA	0	NA	38	3	8.56782	490.019	2526.24	0.499531	0.0077	0.7881	0.7958	0.798487	10.0425	primary	IM
GSE76124	GPL570	GSM1974749	Negative	Negative	Negative	NA	NA	NA	NA	NA	0	NA	44	2	8.87346	652.24	2039.11	0.540263	0.139	0.6383	0.7773	0.542481	9.62285	primary	IM
GSE76124	GPL570	GSM1974752	Negative	Negative	Negative	NA	NA	NA	NA	NA	0	NA	65	2	9.06164	1613.13	2752.89	0.31924	0.2649	0.9686	1.2334	0.249682	8.89901	primary	MSL
GSE76124	GPL570	GSM1974754	Negative	Negative	Negative	NA	NA	NA	NA	NA	0	NA	66	2	8.49241	84.0401	1355.46	0.684929	0.0532	0.504	0.5572	0.50889	9.90817	primary	SL
GSE76124	GPL570	GSM1974756	Negative	Negative	Negative	NA	NA	NA	NA	NA	0	NA	48	NA	9.07395	1269.72	1444.31	0.537458	0.3101	0.5154	0.8255	0.439997	9.53574	primary	MSL
GSE76124	GPL570	GSM1974758	Negative	Negative	Negative	NA	NA	NA	NA	NA	0	NA	51	3	8.59471	-35.8218	1284.64	0.705052	0.0477	0.6371	0.6848	0.768941	9.99314	primary	SL
GSE76124	GPL570	GSM1974760	Negative	Negative	Negative	NA	NA	NA	NA	NA	0	NA	85	3	8.15629	-1019.74	-647.919	0.935828	0.1099	0.2681	0.378	0.507346	9.07971	primary	SL
GSE76124	GPL570	GSM1974762	Negative	Negative	Negative	0	NA	NA	NA	NA	0	NA	72	NA	8.94459	2087.8	2205.88	0.329285	0.5628	0.6649	1.2277	0.0244963	8.08331	primary	MSL

## Sheet: Supplementary Table S2
Gene	SVM.Information.Gain	MSL	LAR	IM	SL
A2M	0.157095	11.7137	10.8685	11.1181	11.461
ABAT	0.281291	8.31285	8.55804	7.43208	6.75065
ABCA6	0.174443	7.03881	5.89711	6.11908	5.63881
ABCA8	0.208348	8.00409	6.146	6.05407	5.68783
ABCB1	0.126599	6.48514	5.8915	6.45473	5.67339
ABCC8	0.13983	5.66172	5.92225	5.08226	4.88318
ABCE1	0.107585	9.46815	9.59919	9.78542	9.95577
ABCF1	0.138761	10.1412	10.3305	10.5001	10.7078
ABCG1	0.169869	8.17884	8.40639	8.11476	7.58656
ABI1	0.120374	8.90632	8.81754	9.25145	9.24548
ABLIM3	0.220949	8.295	7.72091	6.91527	6.51032
ABTB2	0.132532	6.99895	6.99599	7.16053	7.75433
ACACB	0.132747	8.36267	7.66705	7.39431	7.24492
ACADSB	0.21228	7.73095	8.09364	6.97266	6.5373
ACOX2	0.220511	8.48004	8.53804	7.13676	6.64666
ACSL4	0.118195	7.26268	6.52188	7.47062	7.24056
ACSL5	0.126096	8.35479	7.78075	8.89984	7.88102
ACTG2	0.134845	8.26156	7.45247	7.55781	9.21661
ACTL6A	0.111964	9.36744	9.76778	9.77594	10.1305
ACTR3	0.117289	11.2463	11.1406	11.5761	11.477
ACTR3B	0.214685	7.75571	7.85952	8.10607	9.11313
ADAM17	0.110311	8.2346	8.19982	8.35931	8.66172
ADAMDEC1	0.140572	7.48769	7.48228	9.78753	8.18148
ADAMTS1	0.104483	8.58048	7.60324	8.0791	8.53784
ADAMTS5	0.114817	8.45885	7.32059	7.42682	7.70356
ADCY7	0.137848	8.00444	7.441	8.46956	8.04314
ADCY9	0.148047	7.9315	7.99896	7.46161	7.39537
ADD3	0.123702	10.6746	9.7795	10.4628	10.024
ADH1C	0.125834	6.60664	5.55326	5.26715	4.81165
ADORA2B	0.127094	6.80901	6.59714	6.90926	7.82123
ADRA2A	0.197268	8.67883	7.79735	7.57254	6.80891
ADRB2	0.178371	8.16876	7.16322	7.86453	6.92782
AFF1	0.135902	8.61637	8.41205	8.42847	7.98338
AFF3	0.133677	5.65265	6.18095	5.49283	4.79746
AGPAT4	0.102675	6.84523	6.27564	6.47505	7.15463
AGR2	0.315772	10.4355	11.3684	7.73071	6.53957
AGTR1	0.202322	8.08819	7.68173	6.54094	6.16994
AHNAK	0.174475	9.6836	9.27209	8.79719	8.70937
AIF1	0.165642	9.24519	8.41742	9.60258	8.58237
AKAP12	0.216113	8.73947	7.6329	7.45359	7.40261
AKR7A3	0.210529	8.80944	9.35317	8.0845	7.85391
AKT3	0.14619	8.00394	7.33765	7.98646	7.865
ALCAM	0.146833	10.4009	10.6814	9.57974	9.34507
ALDH1A1	0.197974	8.67841	7.24029	7.96936	6.81174
ALDH1A3	0.113268	8.68765	7.78377	8.15457	9.06118
ALDH2	0.16164	10.5216	9.86907	10.2748	9.41613
ALDH4A1	0.103988	7.69292	7.8272	7.11158	7.11984
ALDH6A1	0.144288	8.41183	8.4495	7.64135	7.72956
AMD1	0.243132	9.11725	9.20652	9.68943	10.1746
AMPH	0.101075	7.51834	7.32641	6.79056	6.63061
ANGPTL2	0.134646	9.22926	8.30722	8.0172	8.23658
ANK2	0.126481	7.29588	6.44556	6.68504	6.40341
ANKRA2	0.135067	8.89966	8.95814	8.62873	8.29314
ANKRD27	0.113138	9.36831	9.42665	9.75499	9.95757
ANP32B	0.15105	12.1233	12.0162	12.3853	12.5064
ANP32E	0.248011	9.06725	9.13205	10.0376	10.2871
ANXA1	0.199155	11.4351	10.1332	10.9801	11.2648
ANXA9	0.256872	7.36396	8.20695	6.40556	5.89076
AOC3	0.187081	9.08491	7.61394	7.70595	7.42471
AOX1	0.102247	7.75659	6.96236	6.76245	6.43273
AP1M2	0.114299	8.7553	9.58187	8.48134	8.83447
APBA2	0.128882	6.86719	6.56644	7.57616	7.62676
APEH	0.140005	8.78297	9.06654	8.66309	8.46565
APH1B	0.149444	8.4234	8.4469	8.18636	7.80676
APOBEC3C	0.122314	7.65183	7.16939	8.1211	7.49367
APOBEC3G	0.16253	8.19447	7.65158	9.19536	7.88837
APOL3	0.122843	8.89049	8.43721	9.359	8.34807
APP	0.11814	10.6815	10.4788	10.3152	11.1371
AQP1	0.170814	10.0256	8.79272	8.80266	9.20426
AR	0.295008	8.95256	9.29531	7.65275	6.94801
ARF3	0.105158	9.9612	10.2186	9.8768	9.75552
ARHGAP25	0.209798	8.20937	7.3685	9.01478	7.63194
ARHGDIB	0.10933	11.6601	11.1759	11.8603	11.0076
ARHGEF2	0.102044	9.66143	9.50442	9.85622	10.0128
ARHGEF6	0.1169	10.1587	9.37281	10.1281	9.48631
ARHGEF9	0.206325	7.73166	7.6558	7.86004	8.6455
ARL3	0.144592	8.84548	9.01953	8.43243	8.39766
ARL4C	0.122212	8.53719	7.98135	8.69301	8.78765
ARL6IP5	0.102282	12.1074	11.6981	11.9063	11.5624
ARNTL2	0.117121	6.43538	6.30287	7.46857	7.32651
ARRB1	0.147022	8.5251	8.3086	8.0923	7.6615
ART3	0.216956	5.54321	5.36089	6.85135	8.09827
ASAH1	0.122292	10.1415	10.0982	9.89973	9.54284
ASF1B	0.137634	7.96118	8.70932	8.70652	8.8881
ASNS	0.140652	8.62915	9.06232	9.42793	9.72319
ASPA	0.121367	6.56911	5.42493	5.32261	5.12639
ASPM	0.233916	7.36686	8.3755	8.82425	9.3833
ASPN	0.177371	10.8048	9.80284	8.40696	8.82799
ASTN2	0.199767	6.74754	7.02324	6.08918	6.16034
ATAD2	0.146158	7.8308	8.75069	8.83502	9.15557
ATP11A	0.102605	6.56909	6.45471	6.99098	7.05038
ATP1A2	0.110497	6.6246	5.69398	5.51439	5.32392
ATP7B	0.18415	8.12649	8.30189	7.16361	7.18707
AURKA	0.17186	7.84321	8.68142	8.84976	9.1165
AURKB	0.189721	6.7851	7.51151	7.7807	8.06939
BACE2	0.118707	9.50314	9.11368	9.39109	10.2073
BACH2	0.133068	7.1613	6.40724	7.23097	6.92532
BANK1	0.11499	6.58292	5.62829	7.60581	5.7984
BATF	0.150678	8.70323	8.82573	9.13061	8.05515
BBOX1	0.124157	6.92955	5.93208	7.17977	8.20827
BBS1	0.168738	8.40507	8.4985	7.91123	7.93154
BBS4	0.180674	8.3232	8.44891	7.82404	7.69496
BCAM	0.146297	8.06956	8.31281	7.45541	7.43234
BCAS1	0.172763	7.22124	7.80635	6.59474	6.11808
BCAS4	0.122998	7.3713	7.93969	7.25114	6.84279
BCL11A	0.359912	7.39274	6.69532	8.65178	9.22363
BCL11B	0.136547	7.54546	6.72935	8.35368	7.61183
BCL2	0.104507	8.02768	8.04101	7.75483	7.29128
BCL2A1	0.17803	7.28362	6.73082	9.26175	7.97576
BCL2L14	0.100829	6.05161	6.09042	6.89679	6.73121
BECN1	0.101845	9.26149	9.39484	9.0956	8.93647
BICC1	0.110159	7.67108	6.97783	6.95847	7.19297
BIN2	0.139542	7.41249	6.513	8.56743	7.05528
BIRC3	0.175814	8.04627	7.36231	9.51292	7.9838
BIRC5	0.175083	7.50572	8.32657	8.48918	8.86688
BLM	0.208818	7.63331	8.0387	8.53182	8.59877
BLNK	0.101311	9.13378	8.97505	9.42451	8.33685
BLVRA	0.170359	9.60041	9.64146	9.4955	8.81072
BLVRB	0.124517	10.4771	10.5691	10.0684	9.66432
BMP4	0.103717	6.81827	6.23486	5.41792	5.33833
BTBD3	0.117037	9.26279	9.4196	9.21906	10.046
BTD	0.104312	7.73318	7.7462	7.4128	7.2883
BTF3	0.113198	12.2437	12.2128	11.9731	11.8395
BTG2	0.198267	9.91286	9.7848	9.70777	8.84167
BTG3	0.211874	8.67532	8.52793	9.09519	9.69688
BTK	0.159698	7.57585	6.95824	8.24228	7.10767
BTN3A1	0.111402	8.41915	8.08943	8.96926	8.25447
BTN3A2	0.115292	8.43502	7.98044	9.14228	8.2992
BTN3A3	0.1306	8.33249	7.79327	9.00181	8.02898
BUB1	0.209752	6.00028	6.71733	7.01536	7.30946
BYSL	0.229048	8.24869	8.69851	8.79672	9.36968
C12orf10	0.140233	9.37398	9.53116	8.99382	8.94063
C16orf45	0.252757	8.38662	8.28919	7.41276	7.22481
C1GALT1	0.119437	7.45273	7.27155	7.96024	8.05447
C1orf106	0.118075	8.43111	8.54892	9.14607	9.8615
C1orf112	0.142794	7.29915	7.70496	7.8655	8.18912
C1orf21	0.120343	7.73811	7.7505	6.74446	6.86055
C1orf54	0.107756	9.99425	9.30701	9.90162	9.34831
C1QTNF3	0.154511	8.1222	7.92642	7.02965	7.05099
C1R	0.110298	11.031	9.90613	10.5367	10.3686
C1S	0.138116	11.4597	10.1337	11.1077	10.6633
C21orf91	0.214939	8.10391	7.91013	8.80688	8.84445
C3	0.133784	12.09	10.7953	11.7311	11.2287
C5orf15	0.104237	10.0766	10.0116	9.91148	9.66804
C7	0.171771	7.82544	6.09895	6.50483	5.89964
C9orf116	0.219549	7.14092	7.72747	6.55313	6.32265
CA12	0.324413	9.75951	10.4479	8.25686	7.71607
CACNA1D	0.155707	6.88336	7.19854	6.14289	6.22696
CACNA2D2	0.176228	7.46754	7.90782	6.94612	6.64825
CACNG4	0.116275	7.94262	8.60984	7.61516	7.47587
CADPS2	0.131694	9.12078	9.04753	8.46872	8.11061
CALCOCO2	0.14971	9.40681	9.43012	9.37403	8.9318
CALD1	0.124429	9.63633	8.95125	8.97056	9.59072
CAMLG	0.132042	10.9607	10.878	10.525	10.381
CANT1	0.107795	10.0696	10.5826	9.86988	9.86663
CAPN9	0.101757	6.49766	6.98235	6.13167	5.90796
CASP1	0.181708	9.15003	8.43889	9.88603	8.85381
CASP4	0.139251	8.53925	8.01901	8.85839	8.1836
CAV1	0.249976	10.7601	9.13467	9.4006	9.40723
CAV2	0.188552	8.81327	7.52456	7.67	8.29334
CBFA2T3	0.119275	7.46806	7.42011	7.52778	6.64204
CBR4	0.105879	8.81842	8.94604	8.47921	8.29511
CBX7	0.136702	9.09278	8.52434	8.70493	8.20278
CCDC69	0.224	7.77445	6.56044	7.91723	6.56521
CCHCR1	0.105051	7.60601	7.8972	7.89395	8.2887
CCL19	0.104781	9.16395	7.63634	9.54797	8.17657
CCL5	0.209183	9.33313	8.39025	10.9131	9.23521
CCL8	0.103545	8.84227	8.3505	10.1019	9.26041
CCNA2	0.225485	7.56316	8.27699	8.81359	9.10949
CCNB1	0.179749	8.47883	9.48506	9.47917	9.7317
CCNB2	0.229487	7.57327	8.31537	8.56249	8.94639
CCND1	0.120907	10.1562	10.5909	9.30291	9.41439
CCND2	0.201045	8.62207	7.78049	8.86014	7.88703
CCNE1	0.227208	7.2914	7.70173	8.34521	8.75892
CCNE2	0.102652	7.14295	8.06496	8.20453	8.23719
CCNH	0.138407	9.61084	9.53666	9.35999	9.02919
CCR1	0.112932	8.57229	8.06405	9.33375	8.55796
CCR2	0.175339	6.96913	6.26524	7.74033	6.4134
CCR5	0.169233	8.22927	7.54801	9.05989	7.81402
CCR7	0.151864	7.67475	6.92899	8.91263	7.27062
CCT3	0.116979	11.7598	12.1676	12.1634	12.3756
CCT5	0.100863	10.2169	10.6075	10.6183	10.8208
CCT6A	0.105596	10.5397	10.8569	10.9325	11.1316
CD180	0.102854	7.77359	7.19884	8.40988	7.63879
CD19	0.110233	6.77803	6.36003	7.96113	6.56324
CD1C	0.153507	7.73313	6.21888	7.74417	6.37084
CD2	0.214955	8.83807	8.03578	10.1728	8.34995
CD200	0.123448	7.79696	7.06084	7.74713	7.40482
CD247	0.166227	7.86158	7.03967	9.02113	7.47735
CD248	0.11193	9.48697	8.74132	8.74806	8.69185
CD28	0.110567	5.97109	5.51038	6.4239	5.58732
CD34	0.138839	8.63833	8.00725	7.94489	7.74101
CD36	0.147346	9.09661	7.53507	8.00702	7.27657
CD37	0.126317	7.80987	7.05686	8.74348	7.12204
CD38	0.16085	7.1859	6.75085	9.05889	7.38879
CD3E	0.112264	7.35942	6.89238	7.99376	7.041
CD3G	0.173573	6.63522	5.92425	8.0379	6.28095
CD40	0.121259	7.63511	7.27287	8.30888	7.43424
CD48	0.207034	9.20416	8.39857	10.3274	8.66565
CD52	0.178001	9.51378	8.33055	10.5188	8.5555
CD53	0.202566	9.90912	9.22703	10.7516	9.49478
CD6	0.131914	6.94082	6.55779	7.6704	6.86918
CD69	0.178134	8.10465	7.17263	9.0406	7.33796
CD7	0.114204	6.29272	5.82635	7.19055	6.19802
CD72	0.106215	6.57063	6.02837	7.63845	6.32708
CD74	0.120329	12.1018	11.6068	12.5748	11.6191
CD79B	0.109445	6.94566	6.27371	7.68819	6.69412
CD83	0.112938	9.06837	8.65031	9.75682	9.3274
CD86	0.160235	7.63663	7.137	8.48518	7.41192
CD8A	0.139841	8.56369	7.84956	9.71959	8.0844
CD8B	0.127474	6.28571	5.82641	7.11316	6.1319
CDC20	0.268894	8.25718	9.19421	9.60569	10.4458
CDC25A	0.178467	5.98062	6.63695	6.87491	7.29726
CDC25B	0.103684	9.16019	9.43562	9.93615	9.95965
CDC25C	0.107288	5.93584	6.5648	6.57306	6.69998
CDC42EP3	0.101555	8.35291	7.73834	8.28299	8.44899
CDC6	0.177047	6.74793	7.54003	7.55837	7.87169
CDC7	0.133911	8.09225	8.69139	8.92665	9.17951
CDCA3	0.191685	7.44294	8.30672	8.56658	9.10975
CDCA8	0.214137	7.17855	8.20996	8.64349	9.1855
CDH11	0.106284	9.76421	9.00748	8.64093	8.7571
CDH3	0.211468	8.21299	7.80772	8.82364	10.145
CDH5	0.163364	8.64108	7.7026	7.73011	7.56256
CDKN1C	0.114404	8.17403	7.41625	7.33941	7.69244
CDKN2A	0.159044	7.60172	7.72336	8.57836	8.88954
CDKN3	0.108465	8.17388	8.89009	9.07587	9.20745
CDO1	0.143626	8.16841	6.82557	6.8755	6.74043
CEBPB	0.184447	12.1277	11.9286	12.5168	12.7776
CEBPG	0.134314	8.72354	8.85546	9.23363	9.49324
CELSR1	0.102479	7.5494	8.04454	7.19438	7.20206
CENPA	0.181962	7.70535	8.22793	8.4366	8.77956
CENPE	0.151137	6.502	7.43705	7.72291	8.15496
CENPF	0.253756	7.32764	8.08682	8.40375	8.94479
CENPI	0.133799	5.81052	6.36168	6.47304	6.66929
CENPM	0.155476	7.07226	7.97441	8.10824	8.31977
CEP55	0.211218	7.93621	8.97069	9.26685	9.7341
CEP57	0.10045	8.39576	8.23993	8.58594	8.73109
CFD	0.219653	10.2621	8.94965	9.03159	8.00366
CFH	0.218117	9.23785	7.89189	8.22477	7.6455
CFI	0.113851	8.68484	7.5267	7.9884	7.74865
CH25H	0.12728	7.82955	6.61075	7.20957	6.70407
CHAD	0.125649	6.7914	6.81812	5.42508	5.10428
CHAF1A	0.108147	7.36828	7.67869	7.78954	7.93853
CHAF1B	0.147311	6.86281	7.44669	7.48237	8.15987
CHEK1	0.247136	6.49661	7.06918	7.3411	7.79155
CHEK2	0.131934	7.37289	7.75223	7.92906	8.18181
CHI3L2	0.156086	7.69022	7.34242	8.55436	8.92691
CHL1	0.12185	6.45628	5.13865	5.6222	5.15499
CHN2	0.126702	6.84617	6.86143	6.60002	6.14945
CHODL	0.209232	5.63948	5.5303	6.65201	7.42299
CHORDC1	0.12239	8.14712	8.24923	8.66257	8.699
CHRD	0.143635	7.14044	7.22618	6.56002	6.31763
CHRDL1	0.156166	8.85049	6.88036	7.5891	7.34629
CHRM3	0.117858	5.95925	5.68757	5.95398	7.28895
CHST2	0.170974	7.17079	6.70863	8.06368	7.70659
CHST3	0.2212	7.15962	6.52263	6.80143	8.00183
CIAPIN1	0.107908	8.90038	9.12137	9.11683	9.35545
CIB1	0.131336	10.5767	10.881	10.4627	10.1875
CIDEC	0.106204	8.96526	7.92956	8.02662	7.77902
CILP	0.193362	10.8242	9.32558	9.20404	8.52522
CIRBP	0.253362	10.8406	10.7373	10.1737	9.94167
CISH	0.166215	9.05777	9.1604	8.98357	8.33517
CKAP5	0.109835	9.35706	9.77622	9.7047	9.99582
CKS2	0.16014	10.3124	11.0613	11.3243	11.5579
CLDN5	0.206227	8.93883	7.59459	7.71179	7.33322
CLEC10A	0.199166	7.89021	6.66974	7.96786	6.88982
CLEC2D	0.145797	6.22695	6.02992	7.03354	6.01119
CLEC4A	0.138581	7.5513	6.72167	8.17247	7.06376
CLEC7A	0.132304	7.7107	7.28377	8.60883	8.0841
CLGN	0.10066	6.90063	7.5045	5.94083	5.68551
CLIC4	0.120053	9.77343	9.44151	9.76891	10.1213
CLSTN2	0.249437	7.88065	8.17384	6.10542	5.86351
CNN1	0.11042	8.53461	7.6354	7.1781	7.67051
CNOT1	0.100191	9.12177	9.23008	9.42695	9.53797
COL14A1	0.213986	8.25827	6.71347	6.63533	6.53318
COL15A1	0.124067	10.6675	9.49497	9.62868	9.70843
COL1A1	0.110222	11.7751	11.3327	10.6444	10.8678
COL1A2	0.101393	13.5912	13.0475	12.4824	12.654
COL3A1	0.113538	12.4858	11.8526	11.4176	11.4876
COL4A3BP	0.13745	8.8177	8.57309	8.51464	7.98191
COL6A3	0.122261	12.8958	12.2256	11.8759	11.8792
COL9A3	0.158057	6.20106	5.81909	6.4443	8.32259
COMMD10	0.116408	8.81071	8.92518	8.52419	8.11168
COMP	0.118556	9.97605	9.08322	7.8951	8.14031
COPZ1	0.111794	10.5248	10.7914	10.3196	10.2404
COPZ2	0.152296	9.03349	8.20277	7.73932	7.91231
COQ6	0.107661	8.30681	8.50763	8.10211	8.02676
COQ7	0.133363	8.15086	8.54953	7.91244	8.04897
CORO1A	0.166542	9.12074	8.29657	10.2007	8.68005
COX7A1	0.176524	9.37738	8.31368	7.95436	7.9844
COX7C	0.100527	12.1474	12.1628	11.9047	11.7394
CPA3	0.177313	9.36135	8.29371	7.94584	6.93036
CPB1	0.118884	7.45307	8.63598	6.26154	5.90777
CPE	0.162388	9.86127	9.29116	8.4004	8.36351
CPVL	0.108784	9.33499	8.35781	9.48036	8.67815
CRAT	0.157813	8.88467	8.81885	8.17667	7.75974
CREB3L1	0.105863	8.07177	7.96441	7.54515	7.20536
CREB3L2	0.155389	9.88075	9.56842	9.94711	10.3146
CRISPLD2	0.147943	10.625	9.62475	9.7556	9.5626
CRLF3	0.117418	9.61077	9.33043	10.1577	9.68705
CRNKL1	0.101902	9.18324	9.52106	9.02674	8.862
CRTAM	0.159369	6.30884	5.55835	7.27266	5.69683
CRTAP	0.107753	9.33864	8.94387	8.69369	8.68388
CRY2	0.139985	8.43989	7.89139	7.36074	7.30888
CRYAB	0.272726	10.2677	8.73514	9.11973	11.2238
CRYL1	0.132617	8.96965	8.86647	8.4856	8.32273
CSF2RB	0.226283	8.57305	7.6804	9.74605	8.2312
CSRP2	0.187239	9.46288	8.78435	9.27664	10.2303
CST3	0.128271	10.8147	10.524	10.129	9.68278
CST7	0.152722	8.31596	7.5477	9.24196	7.88508
CSTB	0.103346	10.8796	10.8444	11.1852	11.5094
CTDSP1	0.1243	9.70558	9.53048	9.30035	9.20516
CTLA4	0.110778	6.1372	6.00585	7.45685	6.38461
CTSC	0.165724	9.94775	9.19526	10.916	10.094
CTSF	0.100527	9.68797	9.6565	8.85865	9.09419
CTSG	0.119468	7.71962	6.80456	7.08649	6.55065
CTSK	0.120876	11.9338	10.9175	10.8149	10.5898
CTSO	0.150519	10.3122	9.8561	9.90133	9.39168
CTSW	0.111986	6.58917	5.80131	7.60682	6.19358
CX3CL1	0.135852	8.30571	7.47174	8.38915	9.00595
CX3CR1	0.165831	9.22559	7.96175	8.07437	7.46402
CXCL1	0.112651	6.73425	6.1427	7.49465	7.59654
CXCL10	0.138188	9.7092	9.74841	11.9479	10.801
CXCL11	0.103372	6.73046	6.65921	8.85659	7.64422
CXCL12	0.253062	10.6076	9.12212	9.49265	8.8547
CXCL14	0.177577	10.5746	9.55668	9.30132	8.29118
CXCL9	0.112617	9.64554	9.11597	11.8354	9.86668
CXCR6	0.138853	6.8003	6.42768	7.83811	6.65376
CYB561	0.117374	9.69557	10.2806	9.61473	9.73718
CYB561D2	0.165627	8.56993	8.77342	8.53486	8.15042
CYB5A	0.223529	10.6622	10.7493	9.91075	9.41107
CYB5R1	0.14731	9.67043	9.97578	9.42842	9.2946
CYB5R2	0.108683	8.20937	8.14503	8.30643	9.15175
CYBB	0.121157	7.63028	7.16164	8.56318	7.44104
CYBRD1	0.151618	9.97169	8.89298	8.18294	8.08276
CYLD	0.107651	7.67478	7.4127	8.07148	7.53365
CYP1B1	0.102675	9.70686	8.79612	9.90028	9.34611
CYP39A1	0.120072	6.05101	5.32495	6.0185	7.07582
CYP4B1	0.208185	7.91735	7.68188	6.44101	5.45431
CYP7B1	0.106049	6.29587	6.00716	6.55249	6.99406
DAB2	0.154426	9.73063	8.69902	9.05001	8.79043
DACH1	0.286292	7.41311	7.94533	6.18015	5.53056
DALRD3	0.217065	8.61607	8.80454	8.13624	7.98729
DAPK1	0.136532	8.41754	8.06008	8.76947	8.99273
DAZAP2	0.113444	11.2067	11.1566	11.0291	10.8148
DBF4	0.157883	7.71381	8.14727	8.64	8.68779
DCN	0.222506	11.4893	10.2653	10.1392	9.73281
DCXR	0.12634	10.2554	10.7563	9.97364	9.81984
DDR2	0.112051	8.62631	7.6905	7.91487	8.28735
DDX18	0.107401	9.66839	9.71127	9.88296	10.0864
DDX21	0.132408	10.4093	10.6722	10.9817	11.0465
DEK	0.168012	11.0763	11.1093	11.6431	11.9228
DENND1C	0.118958	7.47541	7.05981	8.25022	7.22318
DENND2D	0.142421	8.84243	8.80954	9.319	8.32174
DHCR24	0.121429	10.2652	10.7774	9.63685	9.67266
DHRS2	0.127086	7.67202	7.97853	6.18771	5.61872
DHTKD1	0.114201	8.85785	9.5174	9.45242	9.74865
DIXDC1	0.123753	8.42941	7.98908	7.25705	7.63971
DLC1	0.103327	8.02519	7.43365	7.30282	7.34083
DLG3	0.131444	8.23583	8.75811	8.16416	8.3133
DMD	0.124907	6.93019	6.15204	6.69979	7.1281
DMXL1	0.116718	8.67697	8.56907	8.45503	7.95367
DNAJC1	0.121672	10.2615	10.5539	10.0833	9.75906
DNAJC12	0.274766	8.71071	9.63574	7.36317	7.11518
DNALI1	0.289132	7.64143	8.21515	6.0631	5.39704
DNMBP	0.143249	8.03441	7.8901	7.27304	7.25557
DNMT1	0.143705	9.69453	9.9404	10.2688	10.3741
DOCK10	0.133759	7.64797	7.05652	8.31996	6.97142
DOCK2	0.180055	7.81391	6.99265	8.5696	7.24163
DOK2	0.140374	7.74242	6.96798	8.14022	7.26787
DOK5	0.175663	7.87381	7.19737	7.52152	8.37006
DONSON	0.131869	8.0801	8.61204	8.71037	9.07602
DPT	0.199265	9.53123	7.79727	8.0977	7.57454
DPYD	0.172499	8.17463	7.32179	8.17898	7.33702
DPYSL2	0.154488	11.6886	10.7288	11.1268	11.4057
DSC2	0.270762	7.73347	7.64532	8.18377	9.39939
DSG2	0.151054	9.71481	10.0009	9.65146	10.7441
DSG3	0.106025	6.49249	5.91301	6.18273	7.773
DSTN	0.117739	11.924	12.0049	11.3637	11.7045
DTL	0.151768	8.09491	9.03335	9.09172	9.41119
DUSP4	0.125131	9.17837	8.93622	8.21338	7.52732
DUSP5	0.124253	9.39711	9.57985	9.4536	8.53379
DUSP6	0.132158	10.2529	9.28012	9.45411	9.1889
DZIP1	0.144496	7.3415	6.57914	6.94931	7.6539
E2F1	0.102272	7.13885	7.73983	7.69483	7.85836
E2F3	0.251124	8.83853	9.02056	9.51244	9.8545
E2F8	0.1056	6.10043	6.89287	7.248	7.4485
ECM2	0.24732	8.97308	7.85674	7.65865	7.54373
ECT2	0.116786	7.92485	8.77092	8.66535	8.99774
EDN1	0.106673	8.12569	7.35518	7.89077	8.43456
EDNRA	0.108511	9.11776	8.57309	7.80464	8.18005
EDNRB	0.121824	7.5709	6.48499	6.69789	6.59729
EEF1A2	0.190315	7.80784	9.00911	7.08074	6.87409
EFEMP2	0.181078	9.69911	8.97229	8.62453	8.80804
EFHC1	0.117568	8.34155	8.576	7.64724	7.89678
EFS	0.115044	8.71865	8.47837	8.43217	9.43978
EGFR	0.160891	7.22655	6.67131	7.10173	7.5758
EHBP1	0.125831	9.31455	8.93978	9.02404	9.56098
EHD2	0.157893	9.30308	8.3653	7.94453	8.18324
ELAVL1	0.113761	9.06301	9.38366	9.33582	9.62831
ELF5	0.214579	7.33926	6.84811	8.25108	10.0263
ELK3	0.110924	9.02691	8.44181	8.69157	8.47074
ELMO1	0.118954	7.70203	7.05791	7.94861	7.35064
ELOVL5	0.149002	10.2417	10.2624	9.90143	9.45223
EMCN	0.185742	8.38741	7.09076	7.03559	6.72727
EMP2	0.111406	10.1195	10.4461	9.45568	9.72949
EN1	0.257689	6.59725	6.11634	7.25185	9.04452
ENO1	0.138412	10.7272	10.8721	11.1276	11.4502
ENPP1	0.154208	7.96668	8.16331	6.90665	6.96096
ENPP2	0.181215	9.67717	7.96037	9.51661	8.5143
ENTPD1	0.187892	8.4223	7.79035	8.39799	7.57707
EPAS1	0.114338	9.9549	9.19349	9.28482	9.13931
EPB41L2	0.159817	8.65519	7.83967	8.33364	8.54945
EPHB1	0.116295	6.15364	5.91793	6.49435	6.86889
EPHB3	0.174299	8.31729	8.35518	8.16397	9.48223
EPN3	0.13241	7.2265	8.12239	6.98956	7.18355
EPRS	0.114523	9.96931	10.2651	10.4038	10.6561
EPS8L1	0.104948	7.94265	8.28811	7.51482	7.65621
ERBB3	0.150578	9.1151	9.75137	8.5025	8.98622
ERBB4	0.220013	7.65438	8.13888	6.39522	6.06192
ERG	0.139517	7.32247	6.58242	6.60762	6.51072
ESPL1	0.15374	7.67096	8.56725	8.56987	8.78503
ESR1	0.34284	8.11974	8.55538	7.09581	6.20682
ETNK2	0.123671	7.51601	7.88045	7.13515	7.0472
ETV5	0.106319	7.78306	7.31144	7.43829	8.00479
ETV6	0.164545	8.04269	8.01699	8.41381	8.76444
EVI2A	0.156453	9.48762	8.49339	9.8932	8.5668
EVI2B	0.188639	9.14199	8.1501	9.99894	8.33865
EVL	0.19672	9.94867	10.144	9.69288	8.89146
EXO1	0.2283	7.01136	7.78579	8.13108	8.57847
EZH2	0.211009	7.7296	8.5048	9.08687	9.31765
F13A1	0.15753	10.1545	8.72516	9.20497	8.60384
FAAH	0.170423	8.07952	8.49349	7.58233	7.61507
FABP4	0.140834	11.1685	8.54834	8.89767	8.28049
FABP7	0.135996	6.31958	5.73829	7.53758	8.32158
FAF1	0.12811	8.49633	8.62749	8.70067	9.00814
FAH	0.141097	9.10532	9.20261	8.46894	8.30712
FAM49A	0.185778	7.74842	6.98218	8.11898	7.73782
FANCA	0.152118	6.47871	6.75322	7.18046	7.23902
FANCE	0.107415	7.67252	7.7703	8.09125	8.36931
FAS	0.189333	7.80846	7.01005	8.25573	7.50575
FAT4	0.141559	7.14052	6.28347	6.20046	6.28406
FBLN1	0.122539	9.11488	8.17814	7.99347	8.17167
FBLN2	0.119465	9.53427	8.16578	8.29996	8.92917
FBLN5	0.166701	9.38313	8.12483	8.51836	8.95623
FBN1	0.175256	10.5585	9.38011	9.11067	9.02066
FBP1	0.282561	9.88393	10.1878	9.43893	8.22567
FBXL5	0.185649	10.07	9.85866	9.64496	9.26191
FBXL7	0.191264	8.77001	8.75775	7.76994	7.59878
FBXO5	0.133954	7.28104	7.73599	8.08959	8.24919
FCER1A	0.146752	7.7175	6.27543	6.63257	6.31112
FDPS	0.100571	10.2733	10.5559	10.5855	10.9237
FEN1	0.14118	9.10651	9.65151	9.77197	9.9951
FGL2	0.23045	9.43625	8.30798	10.2075	8.56362
FGR	0.108354	8.01152	7.35109	8.62571	7.6827
FHL1	0.21701	9.28475	7.79172	7.91058	7.69623
FILIP1L	0.101603	8.95844	8.21672	8.24039	7.9768
FLAD1	0.128855	8.71499	9.17997	9.18176	9.3929
FLI1	0.141962	7.43525	6.66523	7.5548	6.74392
FLRT3	0.102472	7.58049	7.78772	6.48438	6.51874
FMNL1	0.100219	7.28446	6.85775	7.91651	7.03618
FMOD	0.172031	10.3234	9.26487	8.84859	8.80049
FNBP1	0.155198	9.36722	8.85441	9.80665	9.06309
FOLR2	0.120742	8.36801	7.36558	7.99837	7.41527
FOXA1	0.420447	9.39767	10.3373	7.69107	6.71932
FOXC1	0.352715	8.2249	7.6321	8.69238	10.2097
FOXM1	0.243758	7.53415	8.61012	8.89627	9.59968
FRY	0.130869	7.30803	7.13206	6.56959	6.64594
FRZB	0.138364	8.14102	7.12686	7.21417	7.48683
FSCN1	0.177199	8.29187	7.87175	8.3217	9.09981
FSTL1	0.136496	11.5126	10.4967	10.4867	10.6511
FUCA1	0.167255	10.229	9.99682	10.1912	9.36047
FUT4	0.115087	7.33273	6.96107	7.82571	7.51484
FUT8	0.16036	9.00334	9.07083	8.61098	8.11668
FXYD1	0.146605	7.77836	6.72742	6.75394	6.69314
FXYD6	0.148147	8.78277	8.13723	8.41775	9.23658
FYCO1	0.211796	9.0906	8.80843	8.49808	8.21456
FYN	0.219074	8.9519	7.87089	9.05897	8.59361
FZD4	0.171019	9.17384	8.49121	8.14778	8.08872
FZD7	0.203005	9.18871	8.44876	8.69913	10.0858
FZD9	0.124046	5.15836	5.19543	5.66615	6.27618
G0S2	0.126747	10.0033	8.50589	9.13783	8.81914
G6PC3	0.116911	9.1407	9.45147	8.77003	8.82116
GABBR2	0.132326	5.74294	5.78505	6.38892	6.95311
GABRP	0.291365	8.16834	6.91025	9.25167	11.4516
GAL	0.113532	6.32517	6.41409	6.77344	7.41702
GALNT10	0.246339	8.45226	8.32261	7.67714	7.32956
GALNT7	0.192794	9.9033	10.3006	9.28856	8.90006
GAMT	0.187163	7.77803	8.04759	6.87585	6.53952
GARS	0.10428	11.1149	11.3283	11.4877	11.7168
GART	0.153555	7.56471	7.8	7.9676	8.17445
GAS1	0.120399	8.66468	7.53175	7.84554	8.24315
GAS6	0.105365	10.0784	9.36548	9.30535	9.34522
GAS7	0.191105	8.59431	7.71145	7.99231	7.66117
GATA2	0.136029	7.91358	7.93772	7.48934	7.22339
GATA3	0.29445	10.8455	11.7294	9.93846	8.9323
GBP1	0.189561	9.03684	8.54438	10.5757	9.65459
GBP2	0.141708	9.82556	9.15799	10.3652	9.43397
GDF15	0.155092	6.69653	7.28008	6.18482	5.99926
GFRA1	0.226463	7.72729	8.21724	6.49286	5.81809
GGH	0.173095	8.97899	9.35307	9.8396	10.5038
GHR	0.113361	9.17698	8.42072	7.54745	7.60241
GIMAP4	0.209566	9.3898	8.33367	10.0483	8.52246
GIMAP6	0.21954	8.65852	7.4057	8.91353	7.50076
GIPC2	0.114849	6.12389	5.19213	5.35172	5.26934
GJA4	0.14583	8.09943	7.46655	7.4388	7.1882
GJB3	0.120119	6.53349	6.41157	7.14969	7.29911
GLI3	0.123562	8.83435	9.02812	8.08216	8.21879
GLIPR1	0.124055	8.92895	7.99334	8.90169	8.61685
GLRB	0.102244	6.65839	6.82317	5.68251	6.07106
GLT8D1	0.10054	10.0814	9.88437	9.51483	9.53815
GLT8D2	0.169543	9.5182	8.51158	8.03538	8.238
GLUD1	0.11284	9.97373	9.97567	9.53957	9.48451
GLUL	0.108228	10.8393	10.7717	10.6428	10.2165
GMFG	0.227745	9.67465	8.59257	10.0742	8.80952
GMPS	0.178682	9.3779	9.75793	9.9999	10.2783
GNA14	0.131345	6.60289	6.61657	6.20026	5.68907
GNG11	0.225811	9.65762	8.45945	8.55676	8.22873
GNLY	0.167803	7.21773	6.47426	8.82788	7.17437
GP2	0.146327	6.43397	6.72541	5.91294	5.48281
GPD1	0.115777	6.78752	5.35952	5.40013	5.04565
GPD1L	0.188176	10.3256	10.4206	9.44756	9.18971
GPM6B	0.264575	7.77469	6.96879	7.60529	8.84196
GPR161	0.196449	6.96938	6.74141	6.89099	7.87355
GPR171	0.192463	6.6743	5.71215	8.24991	6.16814
GPR18	0.157939	6.90087	6.18272	8.31816	6.51917
GPR19	0.133359	5.40505	5.75979	6.42076	6.77383
GPR65	0.155498	8.37756	7.78934	9.03847	7.72655
GPRASP1	0.116742	8.15514	7.43568	7.54913	7.30192
GPRC5B	0.101884	8.07784	7.70417	7.88702	8.60044
GPRC5C	0.157797	8.05572	8.27855	7.19836	7.13965
GPSM2	0.142597	7.59718	8.04017	8.16078	8.82756
GPX7	0.129072	8.68085	8.08357	8.55471	9.12094
GREB1	0.119284	6.40083	6.63295	5.73457	5.46008
GSN	0.158661	10.1125	9.15619	9.44115	9.58129
GSTM5	0.110898	7.85291	7.25169	7.19864	7.03882
GSTP1	0.189085	10.7021	10.2112	10.9333	11.5468
GTPBP4	0.199517	9.45265	9.84993	10.14	10.5045
GTSE1	0.191578	7.33606	7.77733	7.95388	8.2542
GYPC	0.13692	9.6197	8.57695	9.48949	8.95838
GZMA	0.159483	8.43211	7.55581	9.69227	7.86731
GZMB	0.205253	7.73511	6.90983	9.78492	7.90734
GZMH	0.142846	6.98452	6.10061	8.33285	6.39068
GZMK	0.17244	8.62229	7.41636	9.87661	7.59852
H2AFX	0.101194	7.89595	8.2772	8.25591	8.43257
H2AFZ	0.118887	11.9393	12.3789	12.46	12.5833
HAGH	0.132674	9.38415	9.75394	9.27459	9.08075
HCLS1	0.168366	10.0118	9.1441	10.7574	9.5131
HDAC2	0.149553	9.74483	9.87539	10.0192	10.5092
HDGF	0.175671	11.4163	11.7785	11.8783	12.1823
HECA	0.136402	9.4713	9.15516	9.67261	9.62079
HEG1	0.138223	9.44555	8.59635	8.97491	8.61292
HELLS	0.1048	6.14397	7.10891	7.07085	7.52086
HGF	0.138257	6.15894	5.76149	5.80907	5.47397
HHEX	0.137475	7.98946	7.50845	7.8782	6.98935
HIGD1B	0.128081	7.03852	6.35473	6.03771	5.92126
HLA.B	0.11502	13.0964	12.9136	13.8276	13.1657
HLA.DMA	0.153201	10.6048	9.91763	11.2662	10.0132
HLA.DMB	0.148001	10.911	10.2988	11.6013	10.2922
HLA.DOB	0.183795	7.10379	6.4293	8.48003	7.51897
HLA.DPA1	0.140281	11.244	10.4638	11.7897	10.4982
HLA.DPB1	0.115333	10.6334	9.84512	10.9519	9.84613
HLA.DRA	0.13413	12.4103	11.6036	13.0319	11.6809
HLA.E	0.17457	11.806	11.2701	12.3735	11.5622
HLA.F	0.14998	10.9349	10.7119	11.9408	11.1402
HMGA1	0.131008	8.21248	8.49892	8.91986	9.0578
HMGB3	0.19818	8.69214	9.62518	9.38743	9.99678
HMGCL	0.114264	9.69332	9.71254	9.2587	9.17615
HMGCS2	0.129395	7.87799	7.48802	6.26175	5.64158
HMMR	0.178802	7.84577	8.72973	9.01102	9.17574
HNMT	0.167878	8.44264	7.93801	7.93989	7.54137
HOXA5	0.108674	8.2913	6.92437	7.31458	7.38131
HOXB2	0.183528	9.48658	9.50969	8.66447	8.10808
HPX	0.155079	7.58427	8.02091	6.83413	6.59982
HRK	0.125038	5.22224	5.28244	5.43612	6.02458
HSD17B4	0.177512	10.1098	10.0114	9.72606	9.31682
HSPA14	0.12179	8.95595	9.27874	9.59182	9.70881
HSPB1	0.138184	12.1422	12.6259	11.498	11.3746
HSPB2	0.155117	7.47131	6.17713	6.11209	7.03603
HSPB8	0.102033	8.16105	8.23918	7.43503	7.16814
HSPD1	0.112726	10.916	11.2928	11.3026	11.4646
HTR2B	0.14243	7.54294	6.57955	6.34463	6.00136
HTRA1	0.232551	11.8222	10.8569	10.1042	10.2479
ICA1	0.108466	7.75019	8.12241	7.49545	7.4363
ICAM1	0.106767	8.06058	7.83418	8.84523	8.48799
ICAM2	0.171714	8.49959	7.52867	8.74887	8.00943
ICAM3	0.125803	9.63412	9.41236	10.1928	9.07605
ICOS	0.177943	5.82816	5.25826	8.00622	5.84796
ID3	0.107089	9.5395	8.72412	8.73371	8.7261
ID4	0.20868	8.23952	6.99265	7.18337	8.78082
IFI16	0.207059	10.6225	9.62709	11.1763	10.3443
IFIH1	0.10821	7.28947	7.35202	8.42183	7.81345
IFNAR2	0.188681	8.61455	8.27409	9.03029	8.92981
IFNG	0.125913	6.17695	6.09832	7.64451	6.30399
IFRD1	0.183201	8.47884	8.4003	8.97307	9.36634
IFT88	0.107764	8.72871	8.77168	8.37452	8.26098
IGBP1	0.124698	10.0847	9.90901	9.76417	9.45556
IGF1	0.27032	9.06274	7.33347	7.68112	7.07827
IGF2BP2	0.120007	7.5267	6.97636	7.97709	8.33077
IGF2BP3	0.123905	5.65702	5.53418	6.59756	6.82554
IGFBP4	0.205601	11.2793	10.7216	9.9989	9.81498
IGFBP6	0.177274	9.14381	8.05438	7.9546	7.88959
IGFBP7	0.13284	11.1969	10.5589	10.5405	10.4264
IGSF6	0.150739	7.81783	7.26247	8.52606	7.1965
IL10RA	0.187701	9.27411	8.4344	10.0483	8.69453
IL15	0.116083	6.73325	6.33515	7.48929	6.66111
IL15RA	0.13977	7.78434	7.39571	8.29325	7.79583
IL16	0.198477	7.6966	7.06319	8.14468	7.0531
IL18R1	0.127425	6.70835	5.8727	7.29613	6.28252
IL1R2	0.13462	6.39113	5.65574	7.35446	6.95481
IL21R	0.183307	6.52721	5.98058	7.72359	6.40969
IL2RG	0.175123	8.45579	7.81298	9.76155	8.26299
IL32	0.124697	8.59799	7.90793	9.80343	9.00772
IL33	0.142372	7.39983	5.67906	6.48793	5.79409
IL6R	0.100906	6.86939	6.45078	7.55176	6.78632
IL6ST	0.262177	9.43101	9.25194	8.76587	8.14661
IL7R	0.176966	9.06918	8.03523	10.1732	8.68309
ILF2	0.189988	10.8633	11.2983	11.3673	11.8402
ILF3	0.119758	9.349	9.60617	9.62629	9.86137
IMPA2	0.144486	8.81072	9.02312	9.46513	10.1537
INPP4B	0.219328	7.77547	7.83271	7.07887	6.33715
INPP5D	0.175032	7.4264	6.89208	8.0034	7.026
IQCG	0.166868	7.29497	7.36749	8.08183	8.32386
IQGAP2	0.184279	8.92478	8.39378	8.51265	7.60986
IRAK1	0.129425	10.3101	10.5079	10.9383	11.0624
IRF1	0.159218	9.03294	8.86909	10.1569	9.02184
IRF8	0.152502	9.68094	8.88308	10.426	9.04909
ISCU	0.160908	11.5496	11.2121	11.3932	10.8701
ISG20	0.130564	8.87532	8.97359	10.4158	9.20473
ITGB2	0.123791	9.78071	9.0621	10.5644	9.42515
ITGB5	0.227548	9.82373	9.57436	8.61572	8.89443
ITGB7	0.14935	7.45444	6.95195	8.67571	7.3833
ITGB8	0.163454	6.3895	6.45847	6.73215	7.69392
ITGBL1	0.16639	8.90602	7.94845	7.49776	7.40127
ITIH5	0.179946	8.41788	7.04279	7.42697	7.02493
ITK	0.191021	7.5861	6.88755	8.91983	7.11098
ITM2A	0.232393	9.68603	8.0449	9.50925	8.03311
ITM2B	0.131065	12.4113	11.972	12.2104	11.794
ITM2C	0.147461	9.21125	8.61365	9.80813	9.69823
ITPR1	0.172472	8.56372	8.39656	8.32041	7.45015
ITSN1	0.146184	7.88845	7.499	7.25325	7.32081
IVD	0.192553	8.03476	8.26906	7.59592	7.40328
IVNS1ABP	0.112625	9.01357	9.03162	9.35447	9.49328
JAK2	0.146515	7.32615	6.97596	7.99454	6.93461
JAM2	0.288547	8.8281	7.66614	7.73649	7.54701
JAM3	0.201215	9.42467	8.63363	8.54869	8.28351
JOSD1	0.155305	9.70475	9.60636	9.82397	10.2825
JRKL	0.198894	7.4288	6.8524	7.45085	7.98246
KARS	0.118778	11.5925	11.6151	11.8584	12.0592
KAZALD1	0.10188	6.847	7.11136	6.32716	6.28766
KCND3	0.175317	6.62395	6.56236	5.83242	5.62556
KCNE4	0.163664	7.38169	7.45136	6.40206	6.06037
KCNG1	0.131819	5.36488	5.41356	5.83337	6.58345
KCNJ3	0.103579	5.59268	6.5129	5.33298	5.07657
KCNK15	0.154554	5.93678	6.51628	5.05812	4.85419
KCNK5	0.250567	7.09431	6.9283	7.68381	8.65035
KCNMA1	0.139187	7.51921	7.44737	7.10227	6.52038
KCNN4	0.184589	8.08059	7.60578	8.45984	9.29359
KCTD12	0.240374	11.0447	9.77476	10.7031	9.92633
KERA	0.132714	5.99254	5.17164	4.98846	4.69387
KHDRBS3	0.174744	7.77598	7.41852	7.41908	8.73055
KIAA0232	0.170528	9.40789	9.52235	8.94757	8.75764
KIAA1324	0.142764	9.43497	9.99313	8.21655	8.36451
KIF11	0.16806	7.6954	8.68061	8.74794	9.06538
KIF13B	0.162354	9.33853	9.17893	8.63996	8.41885
KIF14	0.236436	6.93557	7.70176	8.07892	8.58061
KIF15	0.186489	6.72669	7.58146	7.82965	8.18801
KIF18A	0.119313	6.06063	6.74968	6.98196	7.403
KIF20A	0.210818	7.88253	8.71716	8.92809	9.43552
KIF23	0.158708	6.37692	7.153	7.24683	7.8016
KIF2C	0.238599	7.87933	8.59879	8.87489	9.28631
KIF3B	0.105482	9.42388	9.75153	9.30763	9.27431
KIF4A	0.226883	7.61112	8.54493	8.707	9.11055
KIF5C	0.121774	7.62184	7.85858	7.13852	6.82125
KIFC1	0.167169	7.18277	8.04586	8.20974	8.77258
KIT	0.144712	9.31758	8.05296	8.55513	9.71908
KLF11	0.100453	8.5673	8.20629	8.41696	8.79015
KLF2	0.140135	9.68661	9.07342	9.24397	8.70733
KLF5	0.178916	7.43943	7.31665	7.45838	8.704
KLHDC2	0.153732	11.142	11.1516	10.6197	10.4854
KLHL7	0.164383	7.61228	7.75448	8.0895	8.61871
KLK5	0.173898	7.35227	6.69861	7.24077	9.02215
KLK6	0.147527	6.71467	6.44576	7.19886	8.71556
KLK7	0.118851	6.4937	5.85673	6.38415	7.98938
KLK8	0.113763	6.70917	6.37989	6.7778	7.76386
KLRB1	0.157208	7.60942	6.53197	8.10669	6.82127
KLRD1	0.137132	6.7181	6.20767	7.6518	6.47337
KPNA2	0.189478	10.2909	10.968	11.163	11.3752
KRT15	0.110118	9.31255	7.97951	8.31321	10.3704
KRT18	0.250346	11.6722	12.4521	10.9216	11.0222
KRT23	0.172322	9.02791	8.37361	9.07828	10.9963
KRT5	0.156432	8.84043	7.54615	8.85731	10.3787
KRT6B	0.230252	8.17047	7.49402	8.33032	10.5863
LAG3	0.131645	5.93511	5.86527	7.5961	6.33027
LAMA2	0.178579	7.98832	6.94145	6.8198	6.75507
LAMA4	0.110097	7.94167	7.27686	7.23406	7.35078
LAMB1	0.104837	9.56069	8.71056	8.60769	8.98019
LAMB2	0.162274	9.81775	9.55923	8.57798	8.997
LAMP3	0.181035	7.92552	7.32516	9.8445	8.95735
LAPTM4B	0.146003	10.5739	11.1231	11.1113	11.7476
LAPTM5	0.11474	11.2661	10.7607	12.0242	10.9208
LAT	0.131485	7.78745	7.22525	8.45177	7.44831
LBR	0.232541	9.90609	9.5555	10.6934	10.6508
LCK	0.18535	7.87039	7.04415	9.11542	7.63158
LCP2	0.181234	7.86929	7.22104	8.74079	7.5033
LDB2	0.25275	8.50617	7.42056	7.35744	7.17594
LDHB	0.252465	12.0492	11.3588	12.5599	12.8812
LGALS2	0.12469	6.79028	5.77458	7.72994	6.29497
LILRB1	0.120704	7.82912	7.29529	8.88348	7.56374
LILRB2	0.147833	7.40974	6.75957	8.29359	7.23257
LIMA1	0.257237	10.4339	10.0807	9.55305	9.2268
LIN7A	0.131808	6.40818	6.36455	5.61992	5.03952
LIPA	0.111315	11.0937	10.6345	11.0759	10.303
LMNB1	0.10575	8.04312	8.58553	8.93295	8.93598
LMNB2	0.134956	8.10671	8.47703	8.69923	9.01398
LMO2	0.163667	9.21473	8.44122	9.09361	8.41148
LMO4	0.153791	8.19364	7.86598	8.53039	8.98093
LMOD1	0.191369	7.35807	6.42328	5.96172	6.14063
LPIN1	0.209499	8.7265	8.43425	9.36871	9.47901
LPL	0.122069	9.93839	8.13028	8.80421	8.95786
LRBA	0.207089	9.83397	10.2693	9.50391	9.25549
LRIG1	0.148568	9.28115	9.37656	8.69421	8.49358
LRMP	0.193816	7.4463	6.41915	8.18115	6.58164
LRP1	0.14985	8.16642	7.42214	7.28866	7.25789
LRP10	0.113544	10.1568	10.1679	9.9275	9.69103
LRP12	0.103438	6.29918	6.1326	6.30971	7.05246
LRP8	0.208597	7.06569	7.48003	8.13601	8.3577
LRRC17	0.252832	8.81987	7.92386	6.99393	6.97834
LRRC31	0.110647	5.91043	6.06512	4.99573	4.32287
LRRC32	0.19055	9.12762	8.36738	7.95069	7.90489
LRRC8B	0.100689	6.85431	7.00596	7.19007	7.47942
LRRC8D	0.186299	9.65234	9.66086	10.1503	10.3913
LRRN3	0.143704	7.23276	6.21905	6.64023	6.01937
LSM2	0.125936	9.27839	9.44571	9.64813	9.93198
LSR	0.119689	8.90161	9.48495	9.23137	9.79585
LST1	0.137278	8.76243	8.07184	9.2505	8.26605
LTB	0.168805	8.34036	7.56196	9.63434	8.09924
LUM	0.125741	12.1297	11.3813	11.0996	10.8994
LY75	0.134953	8.59925	7.66875	9.33799	8.79048
LY86	0.119159	9.60772	8.9601	9.81552	8.77532
LY9	0.118272	6.2955	5.75583	7.08296	5.83226
LY96	0.14837	10.1234	9.10306	10.3582	9.27306
LYL1	0.120556	8.03431	7.32961	8.01642	7.18872
LYN	0.210636	9.1086	8.58201	10.0286	9.51376
LYZ	0.122827	10.3473	9.56516	11.4355	10.1107
LZTFL1	0.122089	8.62586	8.66577	8.00882	8.14063
MAD2L1	0.173893	7.86509	8.79332	8.95546	9.31837
MAF	0.144159	7.95188	7.15383	7.64604	7.19936
MAFB	0.114753	11.1811	10.4842	10.9248	10.47
MAGED2	0.208237	10.4804	11.0123	9.71488	9.82617
MALL	0.178929	8.55797	7.77068	7.95369	9.23353
MAN1C1	0.192807	8.51448	8.21039	7.98661	7.35262
MAOA	0.118215	8.65738	7.80708	7.17431	7.03391
MAP2	0.138522	7.02785	6.99314	7.15948	8.2053
MAP3K12	0.146871	7.64724	7.65287	7.17696	7.01063
MAP4K1	0.156274	7.19152	6.72755	8.23725	6.92308
MAP4K4	0.123518	8.89776	8.33696	8.7201	9.00047
MAPT	0.23365	7.97121	8.3264	6.8188	6.62397
MARCO	0.123788	6.39771	5.74115	7.9641	7.39041
MATN3	0.139607	6.53791	6.29715	5.02954	5.29641
MBNL1	0.116071	9.55677	9.04404	9.67367	9.38877
MCAM	0.100312	9.3173	8.55739	8.62767	9.299
MCM10	0.241011	6.25414	7.20074	7.6841	8.2806
MCM2	0.19409	9.1415	9.92235	10.1543	10.5228
MCM3	0.191309	9.70969	10.1159	10.3758	10.7773
MCM4	0.193545	7.5984	8.27549	8.35716	8.79693
MCM5	0.17355	8.22228	8.42737	8.98803	9.26255
MCM6	0.150791	9.28964	9.63177	9.8813	10.1737
MCM7	0.204659	9.29682	9.73576	10.0239	10.372
MDN1	0.102844	8.01432	7.95018	8.28713	8.45502
ME2	0.117298	9.06601	9.0747	9.75656	9.61235
MEF2C	0.132125	8.71875	7.77176	8.60951	8.07929
MEGF9	0.13817	8.88019	8.92577	8.31587	8.145
MEIS2	0.123747	8.72741	7.69961	7.635	8.16748
MELK	0.238091	8.46262	9.31173	9.94144	10.3591
MEOX1	0.140377	7.66938	6.29424	7.01708	6.54072
MEOX2	0.153498	6.12591	4.71551	4.90352	4.59433
MEST	0.102625	10.1596	9.80726	9.36612	9.8848
METRN	0.174059	8.5253	9.02142	7.76343	7.69496
MFAP4	0.254413	9.04147	6.83782	6.99668	6.36925
MFGE8	0.203077	8.69896	8.15574	8.43039	9.70707
MFSD7	0.141737	6.85495	6.88998	6.15147	5.73064
MGLL	0.132537	9.72359	9.31481	9.01758	8.66446
MGST2	0.154306	10.2776	10.2689	9.76427	9.54292
MID1	0.195886	7.80418	7.35412	7.79376	8.46334
MITF	0.11986	8.52835	7.91655	7.9186	7.82403
MKI67	0.214276	7.51584	8.2196	8.52957	8.82884
MKL2	0.137801	9.42501	9.51916	8.95361	8.91411
MKNK2	0.113773	11.5344	11.5872	11.3522	10.8852
MMP2	0.119087	10.16	9.21149	8.96044	9.21932
MMP7	0.188743	9.50205	8.53696	10.0127	11.2613
MN1	0.162225	8.01473	7.23496	6.79285	6.71194
MNDA	0.140792	9.0163	8.05302	9.62997	8.29946
MOAP1	0.190864	9.978	10.191	9.58179	9.44258
MOCS1	0.11686	6.98223	6.48123	6.25426	6.30495
MORC2	0.161851	9.07352	9.34347	9.36547	9.8587
MPP6	0.144804	5.765	5.2598	6.24901	6.66377
MRAS	0.13976	7.50264	6.84242	7.43511	8.01036
MRPL15	0.119508	10.3579	10.668	10.836	11.1455
MRPL2	0.108089	8.36003	8.45959	8.51338	8.88533
MRPL9	0.117739	10.0076	10.2125	10.3455	10.6135
MS4A2	0.105987	6.29708	5.91627	5.76817	5.33083
MS4A6A	0.166794	10.0142	9.10948	10.2751	9.09054
MSH2	0.139712	8.43395	8.89892	8.94247	9.32715
MSH6	0.125168	8.70741	9.05634	9.10101	9.37877
MSLN	0.131005	5.08223	4.88622	5.92423	7.11852
MSN	0.21591	10.3213	9.71139	10.7116	10.6664
MSX2	0.148148	6.78453	6.90191	5.97297	5.66379
MTMR2	0.189331	8.4332	8.14589	8.36288	8.98688
MTUS1	0.144847	9.22257	8.99698	8.12237	8.31593
MUC16	0.115368	5.40581	5.34099	6.48454	7.72625
MX2	0.123255	9.28208	8.92329	10.1669	9.57298
MXRA8	0.147695	9.90298	9.22471	8.58158	8.97511
MYB	0.168753	9.07275	9.6332	8.4561	8.09218
MYBL2	0.154429	7.36241	8.26592	8.59684	8.85876
MYC	0.119845	9.55739	9.60427	10.2039	10.7264
MYCBP2	0.102043	10.4631	9.94793	10.528	9.93127
MYH11	0.143282	8.14496	6.7807	6.65351	6.755
MYL9	0.106546	9.93336	9.2046	8.72049	9.37493
MYLIP	0.117821	9.60059	9.69312	9.46202	8.97401
MYLK	0.144497	9.78472	8.83339	8.85697	9.53491
MYO10	0.185763	7.73165	7.61564	7.70961	8.66518
MYO1F	0.121345	8.52532	7.95169	9.04754	8.03538
MYO5C	0.153166	10.5724	10.9457	9.83333	9.96745
MYRIP	0.131613	6.11314	5.73371	4.99771	4.65525
NAB1	0.125476	8.2525	7.97229	8.23698	8.59779
NAP1L3	0.131295	7.87088	6.87332	6.71598	6.72244
NAT1	0.303316	10.5035	10.9569	9.21318	8.14121
NAV3	0.169699	6.57517	5.77417	5.32254	5.11198
NBEA	0.140957	7.86469	7.8308	6.96179	6.79129
NBR1	0.102722	9.16077	9.0996	8.93307	8.77837
NCAPG2	0.127757	7.70512	8.19986	8.34821	8.60829
NCF4	0.105576	7.19135	6.78281	7.71339	6.91683
NCK1	0.144604	8.67768	8.51927	9.14321	9.10384
NCK2	0.194734	9.779	9.65837	9.90053	10.3679
NDN	0.229204	9.73432	8.46023	8.38499	8.2901
NDRG1	0.14813	10.6842	10.6269	10.9889	11.7516
NDRG2	0.131546	8.59487	8.09626	8.03258	9.07825
NDUFAF1	0.124532	9.27309	9.38097	9.03673	8.78773
NEDD4	0.138956	8.38692	8.12743	7.63941	7.60158
NEIL3	0.115813	6.42809	7.12914	7.15564	7.35368
NEK2	0.197556	7.34943	8.48952	8.47147	8.95619
NEK9	0.114796	8.14842	7.99432	7.86437	7.5719
NELL2	0.106665	8.59701	8.96568	9.04932	7.95499
NES	0.145178	8.49867	8.04275	8.17458	9.14996
NFE2L3	0.160183	7.0398	6.96171	8.00262	8.00276
NFIB	0.198021	9.49158	8.58884	9.38681	10.1702
NFIL3	0.156694	9.33297	8.84395	9.78404	9.9808
NFYA	0.115339	7.61663	7.88615	7.92258	8.21371
NIP7	0.102148	7.86684	8.06228	8.31954	8.59534
NKG7	0.176662	7.32492	6.26878	9.07951	6.88603
NME3	0.235058	9.80346	10.1869	9.29294	8.99194
NMI	0.169985	10.2221	9.83786	10.8879	10.449
NMT2	0.113005	7.24574	6.80379	7.29491	7.53054
NOTCH1	0.179668	8.43594	8.1003	8.58507	9.01704
NOVA1	0.189214	6.6027	6.64208	5.77329	5.40234
NPDC1	0.180199	9.49705	9.86924	8.70003	8.699
NPR1	0.111593	7.1299	6.33467	6.50053	6.37195
NR3C1	0.138776	9.40032	8.73018	9.29557	8.70184
NRIP1	0.132991	10.4633	10.4797	9.99546	9.60035
NRN1	0.133552	8.92906	7.77922	8.2146	8.43695
NRTN	0.144048	4.16843	4.40021	4.78608	6.07171
NT5DC2	0.152605	7.77644	7.78334	7.7255	8.59897
NUAK1	0.138456	10.0462	9.55013	8.8336	9.01725
NUP153	0.135754	8.85513	9.00192	9.34224	9.39549
NUP155	0.16699	8.44551	8.82816	8.98498	9.3259
NUP205	0.158812	8.52867	8.85131	9.11526	9.28569
NUP62	0.103893	8.8173	9.00836	9.24777	9.30214
NUP93	0.157111	8.11594	8.27951	8.75926	9.11801
NUSAP1	0.149852	8.94379	9.80425	9.88544	10.1121
ODC1	0.138141	10.2751	10.0737	10.837	11.0499
OGFRL1	0.188475	8.70274	8.46408	9.18792	9.55269
OGN	0.259173	8.18755	6.1307	5.47546	5.09137
OIP5	0.129242	7.08951	7.88675	7.89268	8.15896
OLFML1	0.215952	8.42817	7.3714	7.44665	7.16129
OLFML3	0.173223	10.4117	9.64356	9.13203	8.99637
OMD	0.220029	8.2595	6.96377	6.28069	6.01925
OPTN	0.123892	9.69321	9.21345	10.0426	9.80412
OSBPL3	0.1517	7.57514	7.06285	8.06217	8.03667
OVOL2	0.103901	8.24083	8.75732	7.86883	8.24354
P2RX5	0.110523	7.06092	6.61202	8.65433	7.06762
P2RY10	0.105555	5.8287	5.51884	6.79716	5.49595
P2RY13	0.135609	7.29784	6.1201	7.68016	5.93664
P2RY14	0.203516	8.07391	6.75291	8.28011	7.03395
PADI2	0.149077	8.05556	7.78358	8.53596	9.07943
PAICS	0.102602	9.28911	9.78146	9.71819	9.96327
PAK1IP1	0.13839	8.5273	8.48935	8.83694	9.21669
PALM	0.115463	8.38853	8.23211	7.64329	7.58254
PAM	0.104365	10.5082	9.9219	10.0142	10.6078
PANK3	0.102638	9.38563	9.68748	9.16609	9.17701
PAPSS1	0.229661	11.08	10.9735	11.2677	11.8943
PARP12	0.106284	9.60714	9.692	10.4792	9.80912
PARP8	0.121921	8.49169	7.93049	8.87186	7.82345
PARVA	0.139158	8.66127	8.24376	7.81349	8.20625
PATZ1	0.105847	7.83746	8.13544	7.62249	7.7232
PBK	0.164242	7.47917	8.63366	8.82944	9.15462
PCNA	0.122514	10.4332	10.9559	11.0676	11.2604
PCOLCE2	0.115889	8.08027	6.34147	7.37095	7.75344
PCSK5	0.193929	7.88992	6.6202	6.79052	6.66447
PDCD5	0.159117	8.20707	8.31895	8.65991	8.82563
PDE1A	0.161634	6.79449	6.06125	5.95575	5.73126
PDE2A	0.173536	8.04718	7.05339	7.01863	6.85662
PDE9A	0.168655	6.57236	5.96286	6.26636	7.54776
PDGFC	0.104544	9.98921	9.36105	9.04584	9.30857
PDGFD	0.197864	8.9386	8.00454	7.65742	7.46397
PDGFRA	0.129694	8.56048	7.37792	7.75578	7.90038
PDGFRB	0.167421	9.67827	8.95008	8.46149	8.58648
PDGFRL	0.182278	9.71495	8.47006	8.03624	8.23897
PDIA6	0.14683	11.0669	11.2534	11.45	11.8395
PDSS1	0.21455	7.62861	7.90021	8.27347	8.56796
PDXK	0.127347	9.28094	9.28718	9.52993	9.92521
PDZK1	0.100166	7.38648	7.49472	6.1082	5.88418
PECAM1	0.211071	10.0622	8.98194	9.80524	8.95011
PEG3	0.195518	7.58438	7.14976	7.21244	7.67477
PELI1	0.192061	9.00001	8.36775	9.31676	9.5124
PEX11A	0.1422	8.2386	8.30035	7.41493	7.36747
PFDN2	0.150591	10.2443	10.4849	10.6969	11.0165
PFDN5	0.141016	11.7519	11.5608	11.3097	11.0884
PFKP	0.176357	9.34865	9.40001	10.1251	10.6225
PGR	0.153945	6.30266	6.10141	4.9603	4.46334
PHGDH	0.224233	9.10075	9.13949	9.4228	10.705
PIGH	0.102607	7.90221	8.08246	7.6851	7.52982
PIGQ	0.102814	7.60266	7.92727	7.34951	7.43318
PIGT	0.142576	9.91671	10.3443	9.61285	9.66436
PIK3CD	0.20974	8.03496	7.43092	8.65732	7.8712
PIM1	0.170336	8.96718	8.33313	9.3156	9.26176
PIM2	0.101245	8.21939	8.06404	9.27797	8.30207
PIP	0.162663	11.1599	10.6522	8.77915	7.51953
PITPNB	0.122032	10.7068	10.6467	10.864	11.0362
PJA2	0.108645	10.3765	10.1247	10.0181	9.6685
PKP1	0.122581	6.38513	6.17324	6.73463	7.83293
PLA2G4A	0.231192	6.90448	5.85738	7.03112	7.5861
PLA2G7	0.130818	8.12404	7.71701	9.45072	8.50311
PLAC8	0.145436	8.19801	7.2923	9.50184	7.76566
PLAGL1	0.212995	8.35809	7.42339	8.26238	8.55796
PLAT	0.123362	9.57663	9.31933	8.10876	8.27455
PLCG2	0.213138	7.83354	7.3463	8.56507	8.13487
PLCH1	0.131522	6.05083	6.24121	6.69373	7.29112
PLCL2	0.183545	7.88726	6.99693	8.27196	7.26259
PLEK	0.179335	8.691	8.00338	9.65053	8.26884
PLEKHF2	0.143915	9.85013	10.2755	9.84599	9.24359
PLEKHO1	0.12532	8.75637	8.14002	9.19228	8.74823
PLK1	0.181801	6.96221	7.58593	7.76679	8.16799
PLK4	0.101551	6.28931	6.79395	7.02535	7.23637
PLOD1	0.202855	9.65105	9.52009	9.61174	10.4805
PLS3	0.142199	11.2702	10.4283	10.6638	11.3356
PLSCR1	0.12016	9.26364	9.06435	9.93445	9.73812
PLSCR4	0.203674	9.87475	8.64268	8.42166	8.62715
PLXDC1	0.125819	8.15932	7.57796	7.38509	7.33472
PLXNC1	0.132324	8.21452	7.55495	8.27522	7.45206
PNPLA4	0.172011	8.38179	8.5152	7.44144	7.44458
PNRC1	0.104364	9.63575	9.15821	9.90472	9.66444
POLD4	0.136507	9.12979	9.24081	8.88076	8.27087
POLQ	0.150512	6.77739	7.45516	7.63126	7.76058
POLR1E	0.113876	7.96233	7.86514	8.18529	8.50285
POLR2F	0.158675	8.90968	8.92864	9.06512	9.52967
POLR3G	0.109603	6.11106	6.09651	6.46415	6.68408
POP1	0.123274	7.18273	7.53264	7.68172	8.05625
POU2AF1	0.137753	8.1196	7.05597	9.95558	7.90987
PPP1R16B	0.118334	7.38184	6.13282	7.75848	6.67784
PPP1R3C	0.155105	9.04023	8.90049	7.73995	7.87271
PRAME	0.108554	6.44678	7.07747	7.60666	8.35153
PRC1	0.208039	8.86776	9.86981	9.85984	10.5029
PRF1	0.157792	7.68515	7.09126	8.60354	7.59881
PRKD3	0.151886	7.98072	7.62799	8.25636	8.4276
PRKX	0.222106	7.14558	6.98175	7.98359	8.27832
PRNP	0.145466	9.70368	9.05809	9.61831	9.91992
PROM1	0.171656	8.17691	7.46015	8.5895	10.0807
PROS1	0.15533	9.36753	7.9424	8.18942	8.42978
PSAT1	0.159767	7.37152	7.39191	8.21807	8.915
PSMB10	0.109353	9.62173	9.41196	10.3404	9.56867
PSMB8	0.102102	9.94278	9.72174	10.9399	9.91395
PSMB9	0.117711	10.2096	10.0008	11.3462	10.3862
PSME4	0.1078	9.31398	9.49767	9.68841	9.89594
PSRC1	0.110798	7.82056	8.18245	8.49046	8.80171
PSTPIP2	0.108251	7.91958	7.71877	8.78743	8.37507
PTDSS1	0.126311	10.4854	10.6275	10.9585	11.1194
PTGDS	0.12605	9.13171	8.1306	9.29843	8.3019
PTGER3	0.145303	7.28428	6.71972	6.5684	6.26853
PTGER4	0.10312	8.95814	8.10369	9.08816	8.32526
PTK7	0.107389	7.85011	7.73583	7.60559	8.32175
PTPN2	0.117699	7.77267	7.62028	8.19307	8.22287
PTPRB	0.16808	7.34044	6.61094	6.71118	6.35502
PTPRC	0.21964	8.71116	7.91375	9.75845	8.13695
PTPRM	0.116406	8.97756	8.43817	8.46967	8.3115
PTPRN2	0.137619	6.72333	6.33498	6.40071	5.65388
PTTG1	0.198973	9.57115	10.168	10.621	10.7403
PTX3	0.164061	7.31003	6.27942	7.26545	8.41658
PUS7	0.117538	8.77657	9.13964	9.22018	9.61641
QKI	0.180013	9.03571	8.19382	9.1364	9.12405
RAB17	0.159376	8.78289	9.23383	8.22556	8.27246
RAB26	0.132022	8.14045	8.61224	7.82887	7.56503
RAB27B	0.125058	7.04635	7.19937	6.64976	6.22974
RAB5B	0.109066	9.51619	9.68082	9.28797	9.22384
RABEP1	0.148338	7.91233	8.11582	7.65202	7.28365
RACGAP1	0.153652	8.72531	9.52679	9.51498	9.78222
RAD21	0.124484	10.2906	10.6748	10.8088	10.9895
RAD51	0.121808	6.692	7.32172	7.43846	7.66001
RAD51AP1	0.168279	7.82506	8.55233	8.87501	9.24209
RAD54B	0.127259	7.26576	7.88607	7.97049	8.31672
RAD54L	0.1175	6.63368	7.35483	7.51077	7.95812
RAI2	0.182466	9.06318	8.48526	7.9329	7.64627
RANBP1	0.109516	8.68945	8.8034	9.09432	9.28497
RAP2A	0.116691	8.48315	8.22019	8.6636	8.79627
RARRES1	0.135405	8.98612	7.99653	9.79564	9.78576
RARRES3	0.115384	11.1086	10.9845	11.1861	9.90935
RASGRP2	0.106161	6.84678	6.35208	7.18133	6.56975
RASSF2	0.159068	9.24071	8.38148	9.54785	9.04054
RBKS	0.114497	7.89163	8.11421	7.6246	7.47478
RBMS1	0.14572	10.1268	9.53272	10.068	10.2968
RBMS3	0.117926	8.23868	7.67121	7.50124	7.59565
RCN1	0.102292	10.7244	10.4588	10.5826	11.0841
RDX	0.102283	8.44982	7.92987	8.53417	8.69167
REEP1	0.120352	8.17099	8.31287	7.34102	7.18009
REEP5	0.208281	10.5288	10.5962	10.094	9.6973
RET	0.117237	7.55648	7.94909	7.46217	6.84639
RFC3	0.140852	8.14931	8.53034	8.67216	8.93455
RFC4	0.14474	9.13462	9.63523	9.86873	10.1516
RGS2	0.145523	9.76254	8.82198	9.49412	10.1068
RGS5	0.140837	8.93521	8.38273	8.05235	7.9442
RHOB	0.21671	9.94405	9.97086	8.81775	8.87738
RHOH	0.160117	8.39831	8.41977	8.81753	7.46708
RIPK2	0.146208	8.34472	8.58688	9.19554	9.25959
RNASEH2A	0.100047	8.46345	8.94256	9.07917	9.21131
RND1	0.106863	7.01733	7.42281	6.59321	6.22664
RNF103	0.131794	10.1817	10.3615	9.91189	9.77679
RNF8	0.108642	7.47056	7.57118	7.73352	7.95557
ROR1	0.124068	7.14053	6.3852	6.50306	7.33544
RPS27L	0.100707	10.9318	10.6971	10.5792	10.2955
RPS6KA3	0.102144	8.29377	7.8257	8.44616	8.31421
RRAGD	0.114966	8.55069	8.08688	8.72414	9.05132
RRM2	0.130267	9.24763	10.136	10.2155	10.388
RUNX1T1	0.144004	7.35445	6.58552	6.71963	6.49124
S100A2	0.109509	7.7358	7.17242	7.40129	9.06689
S100B	0.130168	5.68053	4.58587	5.3374	6.30316
SCCPDH	0.101164	9.60173	9.80969	8.99808	8.91807
SCPEP1	0.137409	9.24193	8.5878	9.40412	9.60473
SCRG1	0.193552	6.89336	6.72099	7.02843	8.55599
SCUBE2	0.230884	9.57176	9.45291	7.42599	7.11298
SELL	0.162064	8.00121	7.1145	9.19813	7.41118
SELP	0.165255	8.18136	7.2196	7.93338	7.07943
SELPLG	0.134728	7.65698	7.06818	7.99374	7.06664
SEMA3C	0.154403	9.05301	8.64838	7.87575	7.76059
SEMA3F	0.132026	8.50835	8.84206	8.07147	7.93833
SEMA3G	0.139525	8.72892	7.89816	7.91308	7.53382
SEMA5A	0.139325	8.31603	7.73399	7.52812	7.4872
SERBP1	0.138033	10.4499	10.4685	10.7214	10.9195
SERPINA5	0.113347	8.03169	8.63323	6.95934	6.55576
SERPINB1	0.101175	8.37283	8.2255	8.48177	7.8163
SERPINB5	0.165566	7.75471	7.03069	7.54971	9.29629
SERPINB6	0.112457	8.76778	8.69406	8.3981	8.11926
SERPINE2	0.128867	10.1717	9.15649	9.74821	10.0383
SERPINF1	0.14053	11.286	10.172	10.3622	10.0094
SERPING1	0.12994	10.9955	9.91439	10.5543	10.2984
SESN1	0.117771	9.5127	9.18064	8.93786	8.79492
SF3B3	0.123632	8.78967	9.04541	9.14915	9.48886
SFRP1	0.200174	9.16088	7.5681	8.583	10.0328
SFRP4	0.18188	9.5215	8.24974	8.12547	7.67941
SFT2D2	0.175916	8.53366	8.5362	8.98423	9.2813
SGCD	0.137269	7.37247	6.80789	6.29414	6.60983
SH2D1A	0.142841	6.53691	6.07769	7.67769	6.43124
SH3BGRL	0.160823	11.6703	11.3492	11.2439	10.6762
SHCBP1	0.11713	6.52448	6.96246	7.41663	7.45908
SIDT1	0.297157	8.50263	8.75048	8.11825	6.68909
SIRPG	0.103092	6.73079	6.51402	7.54106	6.71227
SIX3	0.103563	5.78378	5.86261	5.63863	7.0098
SKP2	0.164458	7.61143	7.63894	8.41094	8.5954
SLA	0.16912	8.62444	8.08767	9.5994	8.26311
SLAMF1	0.154803	6.85068	6.37736	7.83469	6.63234
SLAMF7	0.100426	7.02688	6.68024	8.36615	6.91675
SLC16A1	0.120398	7.23162	6.82318	7.45265	7.93381
SLC16A6	0.148177	7.25639	7.55826	7.3735	6.28727
SLC19A2	0.102078	8.70674	9.17613	8.24968	8.24143
SLC22A5	0.15449	7.90073	8.14006	7.56469	7.43854
SLC25A32	0.10365	9.20493	9.39889	9.66047	9.78176
SLC27A2	0.115294	7.64241	8.12971	7.5731	6.72057
SLC39A6	0.140293	11.2092	11.7149	10.4572	10.5634
SLC43A3	0.145267	8.58524	8.36198	8.7925	9.18397
SLC44A4	0.206232	7.51016	7.92809	6.39195	5.84433
SLC4A8	0.125777	6.45776	6.85091	5.73955	5.54791
SLC7A2	0.116045	6.1441	6.48189	5.69901	5.21067
SLC7A5	0.181866	8.41625	9.04907	9.63539	10.0288
SLC7A8	0.232361	8.04848	8.22116	7.26387	6.95233
SLC9A3R1	0.185408	10.108	10.9456	9.82966	9.57854
SLC9A6	0.14591	9.08644	8.67218	9.32139	9.47148
SLIT2	0.187967	8.75488	7.77754	7.70432	7.6704
SLIT3	0.196762	7.40511	6.61008	6.46443	6.35718
SMARCA4	0.10029	9.11745	9.4227	9.411	9.64756
SMC4	0.162141	8.76366	9.15465	9.67347	9.64112
SNAP23	0.104565	8.4517	8.31365	8.18103	7.72911
SNED1	0.12914	7.9991	7.56554	7.24998	7.15995
SNRPC	0.130949	9.90468	10.1543	10.2822	10.4347
SNRPD1	0.128225	9.09241	9.39836	9.5188	9.77123
SOCS2	0.112446	8.67018	7.92087	7.98443	7.58117
SOCS5	0.110945	8.95573	8.59406	8.43837	9.07984
SOSTDC1	0.143075	6.10329	5.32413	5.50156	7.62431
SOX10	0.260345	6.94803	6.06739	6.9742	8.71002
SP100	0.11638	8.384	8.08617	8.71659	8.03703
SP110	0.159399	9.09968	8.85193	9.77205	8.5797
SPAG5	0.151784	7.18737	8.15088	8.16185	8.25893
SPARCL1	0.202329	12.0531	11.0654	11.0508	10.6956
SPATA20	0.134329	9.44339	9.74343	8.92068	8.86957
SPC25	0.114949	7.13756	7.73242	7.95038	8.09518
SPDEF	0.267934	9.22461	9.58093	8.53499	8.02892
SPOCK2	0.103798	7.52278	7.21999	8.18987	7.61956
SPON1	0.138883	8.94243	8.04612	7.72656	7.79475
SPRED2	0.105735	7.25027	7.27398	6.41245	6.60612
SPRY1	0.181669	9.27487	8.22237	8.13785	8.17953
SPRY2	0.103338	8.90742	7.86889	7.91334	8.41899
SRGN	0.115789	10.5579	10.0193	11.1544	10.2467
SRPK1	0.247942	8.93105	9.19294	9.56141	9.7727
SRPX	0.189979	10.2317	8.62263	8.6444	9.13987
SSH3	0.111877	8.63838	8.84865	8.25286	8.28438
SSRP1	0.115896	8.7204	8.91379	8.98477	9.31645
ST3GAL6	0.121867	7.02271	6.75982	6.97573	7.59336
ST8SIA1	0.18962	5.45413	4.92416	6.16235	6.48339
STAT1	0.112678	10.3049	10.3508	11.3503	10.5302
STAT4	0.132071	8.00607	7.50256	8.72089	7.6949
STIL	0.196309	8.09967	8.52367	8.89645	9.18049
STK17A	0.112379	8.07061	7.60299	8.51898	7.85235
STK32B	0.102716	7.81533	7.53612	6.5614	6.48008
STK38	0.121679	8.09924	7.95298	8.28618	8.56476
STMN1	0.116221	7.88105	8.12328	8.35935	8.7285
SUOX	0.183196	8.50646	8.62812	8.1028	7.99102
SVEP1	0.197284	8.12552	7.01902	7.03121	6.85762
SYNCRIP	0.12842	9.21297	9.17749	9.54883	9.69099
SYNPO	0.114833	8.00019	7.11569	7.22842	7.20953
SYT17	0.129065	7.46981	7.74857	6.77706	6.51715
SYTL2	0.115187	7.70215	7.84549	7.11443	6.8777
TACC3	0.108526	7.35243	7.89559	8.19137	8.25002
TAF2	0.121225	9.29186	9.55125	9.74138	9.93362
TAF4B	0.108188	7.47874	7.53194	8.02138	8.04477
TAF5	0.101146	8.07874	8.13832	8.52203	8.63515
TAP1	0.180352	9.53279	9.59393	11.2156	10.1828
TAP2	0.111839	7.41313	7.44865	8.2264	7.76283
TBC1D9	0.335355	10.3391	10.6507	9.39524	8.71431
TBC1D9B	0.104781	9.87674	10.0005	9.69207	9.6346
TBPL1	0.105449	8.48679	8.303	8.68695	8.85946
TCEAL1	0.178003	9.09185	9.13471	8.35313	8.19438
TCEAL4	0.108472	11.1139	11.2036	10.4378	10.6183
TCF4	0.168435	10.0632	9.20002	9.63335	9.08862
TCF7L1	0.254065	8.57329	8.04776	8.62524	9.56199
TEK	0.140539	7.42543	6.91503	6.86799	6.55656
TEX10	0.113204	8.38984	8.40632	8.71221	8.87601
TFF3	0.263521	10.1025	10.7335	8.33536	7.72711
TFPI	0.115672	7.39863	6.48152	6.65795	6.41696
TGFB1I1	0.120205	9.62889	8.84383	8.17493	8.95269
TGFB3	0.176193	9.46124	8.89325	8.4283	8.25828
TGFBR2	0.200776	9.7075	8.51687	9.11756	8.5648
THBS4	0.135767	9.3065	8.31775	7.93231	7.90414
TIMELESS	0.102953	8.00197	8.53209	8.3688	8.46783
TK2	0.113528	8.6881	8.37007	8.24189	8.14015
TLE4	0.106406	6.94419	6.37563	6.97494	6.8959
TLR1	0.10192	7.63488	7.22089	8.34323	7.87017
TLR7	0.118784	7.48099	6.78655	7.78545	6.67214
TM4SF1	0.108381	9.26766	8.9414	9.06335	9.95075
TMBIM4	0.218716	10.7126	10.6866	10.2235	9.7195
TMC5	0.100563	8.14178	7.97502	7.24861	6.50642
TMEM100	0.108858	7.75307	6.56568	6.47916	7.46311
TMEM123	0.135049	11.3799	11.2321	11.7589	11.9517
TMEM62	0.120807	8.45062	8.68913	8.32703	8.01015
TNFAIP3	0.15951	9.13752	8.52751	9.99138	9.26809
TNFAIP8	0.149066	8.92632	8.31685	9.45553	8.59798
TNFRSF17	0.142029	7.17042	5.82032	8.60395	6.40376
TNFRSF1B	0.143589	9.0931	8.33184	9.5735	8.69223
TNFRSF21	0.128185	8.55854	8.15315	8.79885	9.29684
TNS1	0.133601	9.0787	8.33615	8.35392	8.32686
TOP2A	0.170826	8.19901	9.13204	9.33307	9.58377
TP53BP2	0.119817	8.69412	8.88209	9.221	9.58374
TPCN1	0.10061	8.57587	8.64977	8.22699	8.08789
TPX2	0.20942	8.35979	9.14011	9.55466	9.8456
TRAF3IP3	0.114277	7.34139	6.94032	8.0355	7.46131
TRAT1	0.120857	5.3901	4.74178	6.58815	5.09295
TRIM2	0.213163	7.70498	7.25787	7.73747	8.64563
TRIM29	0.105364	7.6532	7.44542	7.71108	8.48432
TRIM8	0.103561	9.03472	8.8611	8.5783	8.34635
TRIP13	0.143379	8.56092	9.28576	9.55697	9.8677
TROAP	0.122986	7.93107	8.3461	8.38628	8.63257
TSC22D3	0.144523	9.12365	8.93009	8.78791	8.30484
TSPAN1	0.237833	8.46423	9.26927	7.08724	6.7069
TSPAN13	0.127791	11.9163	12.274	11.5795	11.3345
TSPAN31	0.141668	9.25817	9.02078	8.8013	8.40164
TSPAN7	0.152669	8.6961	6.98336	7.30179	7.07559
TSPYL5	0.13901	9.27704	9.21725	9.64512	10.3537
TTC13	0.101251	8.65808	8.90623	9.15474	9.32906
TTK	0.254907	7.42477	8.21247	8.57874	9.32985
TTLL4	0.170362	7.31193	7.48935	7.8659	8.37197
TTYH1	0.138671	4.91148	4.84539	4.89541	6.81329
TUBB6	0.131573	10.1332	9.68047	10.0257	10.581
TUSC2	0.113112	8.45164	8.70068	8.20174	8.06603
TXNIP	0.117155	12.2718	11.6471	11.8955	11.3854
UBE2C	0.159332	9.28433	10.0499	10.4269	10.589
UBE2E3	0.152444	10.2257	9.74033	10.189	10.674
UBE2S	0.109706	8.51618	9.40676	9.34412	9.66801
UCHL1	0.102364	8.44379	8.28642	8.51798	9.20632
UCHL5	0.114921	7.81278	8.04224	8.21295	8.40501
UGCG	0.175921	10.2436	10.4278	9.93104	9.2963
UGDH	0.128122	10.4773	10.5274	9.65311	9.6982
UGT8	0.208769	5.70164	5.60334	6.62014	7.77433
USP1	0.143925	9.94424	9.99525	10.4112	10.6525
VAV3	0.146838	9.24259	9.65703	8.73224	8.36425
VCAM1	0.124229	9.78627	8.92533	10.4582	9.55418
VGLL1	0.174111	5.76042	5.36995	6.26333	7.62663
VIM	0.122764	11.6227	10.8956	11.2207	11.4609
VIPR1	0.112635	7.71199	7.65055	6.98278	6.83554
VPS72	0.113645	9.82952	10.118	10.1677	10.4191
VWF	0.121633	9.8453	9.14921	9.32422	9.01963
WDR19	0.122189	8.24612	8.19861	7.75792	7.72348
WFS1	0.205561	8.73816	8.88625	8.04355	8.02453
WIPF1	0.134155	8.82377	8.22211	9.10503	8.38694
WISP2	0.105403	8.50711	7.28252	7.2515	6.74786
WWP1	0.122027	9.90315	10.1169	9.61793	9.25247
WWTR1	0.184935	9.24894	8.71636	8.90208	9.66576
XBP1	0.272082	10.6524	10.9444	10.319	9.5369
XCL1	0.130141	6.12275	5.51479	6.99864	5.81414
YBX1	0.146607	10.7944	10.6607	11.1269	11.5098
YEATS2	0.165807	8.40685	8.48567	8.72176	9.1348
YES1	0.107205	8.94578	9.0148	9.15822	9.66018
YWHAQ	0.105968	12.2569	12.3435	12.345	12.6557
ZBTB16	0.143959	7.93442	7.23579	7.07386	6.46834
ZFHX4	0.105084	7.69815	7.17226	6.83521	7.0236
ZFPM2	0.130072	8.35133	7.51503	7.34938	7.34241
ZMYND10	0.110246	6.8817	7.3134	6.43049	6.44734
ZNF423	0.201888	8.79378	7.92955	7.41073	7.44717
ZNF467	0.111064	7.63611	7.94126	7.46544	7.24006
ZNF552	0.140359	7.6602	7.90901	7.28515	7.06326
ZWINT	0.138464	9.52676	10.3882	10.2881	10.5634

## Sheet: Supplementary Table S3
DFS
	coef	HR	se(coef)	z	p
LAR	0.503	1.654	0.156	3.237	0.001
IM	-0.165	0.848	0.239	-0.69	0.49
SL	0.487	1.628	0.162	3.017	0.003
Likelyhood ratio test=20.13 on 3 df, p = 1.6e-04
n = 635, number of events = 302
* reference = MSL
OS
	coef	HR	se(coef)	z	p
LAR	0.715	2.044	0.433	1.651	0.099
IM	0.233	1.263	0.541	0.431	0.666
SL	1.066	2.903	0.419	2.545	0.011
Likelyhood ratio test=8.4 on 3 df, p = 0.03
n = 215, number of events = 50
METABRIC OS
	coef	HR	se(coef)	z	p
LAR	0.829	2.29	0.302	2.742	0.006
IM	0.171	1.186	0.321	0.531	0.595
SL	0.623	1.864	0.268	2.32	0.02
Likelyhood ratio test=11.31 on 3 df, p = 0.01
n = 297, number of events = 128

## Sheet: Supplementary Table S4
	logFC	adj.P.Val	metastasis.prediction.gene.set
SCGB2A1	-1.0653	7.38985e-07
PGR	-0.862985	2.9647e-11
PIP	-0.787357	0.000633891
FABP4	-0.778828	1.59293e-05
ADIPOQ	-0.748695	3.09714e-06
DHRS2	-0.723375	5.76868e-05
HPGD	-0.709003	2.64576e-09
LEP	-0.705683	2.49758e-06
TCL6	-0.647989	2.37073e-16
APOD	-0.615752	0.000108927
SLC6A13	-0.606153	6.23212e-13
SMR3A	-0.572817	6.62682e-09
TSPAN7	-0.554428	1.25602e-06
UGT2B17	-0.551383	2.91864e-06	o
CEACAM8	-0.549884	1.92034e-08
CCL18	-0.544654	3.06497e-05
KRT24	-0.539401	8.19288e-14
KLK7	-0.53506	0.000603966
CCL7	-0.52491	6.43572e-07
SLITRK3	-0.524873	8.88133e-11
CYP4F8	-0.502262	0.000207985
KRT20	-0.501433	1.10089e-09
PPP1R16B	-0.497356	7.43551e-07
MPPED2	-0.497269	2.11697e-06	o
SPOP	-0.49657	2.9626e-16
FOXI1	-0.478544	1.88973e-05
TMPRSS3	-0.460693	0.000173953	o
MGAM	-0.459149	0.000298451
SYT12	-0.456408	1.26881e-11
MNDA	-0.45542	3.81141e-07	o
FAM46C	-0.455245	4.75159e-08
MS4A3	-0.454592	2.29375e-08
BEX1	-0.453948	0.000601895
CYP2B6	-0.449689	4.7022e-07
BCL2A1	-0.440429	0.000372428
LILRA6	-0.440313	8.01681e-11
MMP8	-0.436308	2.50703e-07
STARD13	-0.433066	1.91483e-16	o
SLCO4A1	-0.430031	2.28051e-07
INA	-0.425945	1.50614e-06
GYG2	-0.422241	3.54412e-07
PPARD	-0.421555	6.31432e-16
ALOX15B	-0.419565	0.000125089
IL20RA	-0.415417	0.000202413
PPAT	-0.412331	5.18872e-07
RTN1	-0.410469	1.84865e-06	o
COL21A1	-0.408943	4.00616e-06
HK3	-0.408685	1.84865e-06
DEFA4	-0.408202	7.4565e-07
SLC4A1	-0.406872	3.97421e-09
NRXN1	-0.401899	6.50239e-09
CSTA	-0.401234	0.000124201
CLEC5A	-0.398652	1.1299e-05	o
PDZRN4	-0.397038	2.88435e-06
GRB7	-0.396372	4.23947e-12
OLR1	-0.392875	2.80113e-06
TREH	-0.389574	1.93651e-08
DIRAS3	-0.386386	1.44209e-05
IGSF1	-0.386125	8.60302e-06
PIGR	-0.385638	0.000442385
HOXB8	-0.384926	4.29669e-09
CNTNAP2	-0.383195	0.000439696
PF4	-0.382969	3.30095e-05
LILRB3	-0.380472	2.06243e-07
IL18RAP	-0.378594	3.81172e-05
BTNL3	-0.375693	5.7727e-12
CD163	-0.374169	1.29192e-05
KCND2	-0.373236	3.52038e-05
AZU1	-0.372914	6.65392e-07
SERP1	-0.370159	1.09756e-11
RNF38	-0.369442	1.51522e-10
DNASE2B	-0.36665	6.36981e-05
S100A13	-0.361238	3.81141e-07
RGS19	-0.35715	1.4785e-09
HOXA5	-0.356531	0.000277759
STEAP3	-0.354198	2.05664e-05
MAP2K6	-0.350035	8.57694e-11
CDH18	-0.349308	2.6686e-06	o
TLR3	-0.346937	5.59054e-07
LAIR2	-0.341507	5.62292e-08
MAGEA8	-0.3409	0.000298451
MPO	-0.340058	6.63582e-10
VCAM1	-0.33807	2.55333e-05	o
MMP19	-0.337435	1.67761e-07
CLEC7A	-0.337125	3.65361e-06
TREML2	-0.33683	1.34566e-05	o
FCN1	-0.335588	0.000141
PADI4	-0.334128	4.21536e-06
KLRD1	-0.332656	9.20254e-07	o
TDP1	-0.332452	1.35805e-06	o
VRK3	-0.330442	5.50028e-11
PLEK	-0.329084	1.1299e-05	o
TYROBP	-0.328291	0.000385302
HOXA10	-0.326747	0.000163711
SOX21	-0.326344	5.38443e-07
TSPAN15	-0.323546	3.86974e-06
ITGB2	-0.321838	2.55333e-05
IL1B	-0.318584	4.97414e-06
SLC10A3	-0.318545	6.77096e-06
ANK1	-0.3166	1.7602e-08
PSTPIP2	-0.316514	1.93776e-05
FUT9	-0.315023	6.79945e-05
SIGIRR	-0.313277	8.22822e-06
FGR	-0.312483	3.41043e-05
LILRB2	-0.312229	5.46869e-05
DUSP5	-0.311445	4.14792e-05
SSTR5	-0.310895	1.19741e-07
GLRA3	-0.308122	1.41427e-08
KEL	-0.307586	3.06497e-05
LCP1	-0.305912	2.58772e-05	o
RGS13	-0.305191	0.000925188
C3AR1	-0.30504	9.39943e-06
CCR1	-0.303664	2.58302e-05
KLF1	-0.302444	1.80309e-06
PARP8	-0.30241	3.09714e-06
TMEM156	-0.300759	0.000102785
TMEM39B	-0.300498	1.20192e-07
ZAP70	-0.300091	0.000173953
MEFV	-0.298724	0.000264733	o
JAKMIP2	-0.29818	4.28268e-07
PCDH9	-0.297756	0.000109323
CTNNA2	-0.296501	0.00029382
FPR1	-0.296479	6.95303e-05
ALOX5AP	-0.292624	0.00021416
IGSF6	-0.29239	5.29884e-05
PILRA	-0.29212	1.52816e-06
USPL1	-0.290599	1.88121e-09
CASP5	-0.289672	7.21317e-05
SIGLEC8	-0.289636	6.1853e-07
PTMS	-0.288093	0.000100742
IKZF3	-0.287928	0.000655614
LILRA3	-0.285993	0.000139832
H2AFJ	-0.284768	0.000107771
HCK	-0.283987	0.000236775
GUCY1A2	-0.282241	0.000131256
SERPINA7	-0.28208	0.000351275
DOCK2	-0.28172	0.000179368	o
NCF2	-0.281516	0.000617085
SKAP1	-0.280236	4.10267e-06
QKI	-0.278744	5.8892e-06
NEUROD2	-0.278541	2.49818e-13
CTSG	-0.277367	0.000540329	o
DGKB	-0.276979	0.000823166
APOBEC3G	-0.276977	0.000133981	o
GMFG	-0.276362	0.000186873
ITGAM	-0.276144	9.34474e-06	o
HOXA11	-0.2754	0.000335871	o
SEMA3D	-0.274628	0.000490873
SPCS3	-0.274518	9.23262e-06
RGS6	-0.2745	1.32277e-10
GHRH	-0.273361	0.000236756	o
PMFBP1	-0.272017	8.44772e-05
SCCPDH	-0.271606	0.000342203	o
SHOX	-0.270235	1.87872e-06
GYPA	-0.269324	9.81618e-07
TES	-0.269219	8.9217e-06
LST1	-0.268713	2.55333e-05	o
ITGAL	-0.268639	0.000656584
ARL4A	-0.268625	6.23656e-05
KCNC2	-0.267703	0.000144873
FA2H	-0.265405	0.000387819
SLC13A4	-0.265323	0.000419648
UCP1	-0.264131	0.000315954
PAX7	-0.262872	0.000152699
EMILIN2	-0.261309	0.000370797
ATF7IP2	-0.26085	6.2167e-05
SELP	-0.260813	0.000294419	o
NQO2	-0.26042	3.12502e-07
CNTN5	-0.259795	0.000295631
NNAT	-0.258734	0.00069219
FCAR	-0.258582	6.51443e-09
SYT2	-0.256339	0.000172951	o
GABRG2	-0.256034	0.000175044
CDH7	-0.255715	0.000276612
OXCT1	-0.255208	4.72261e-05
RGS7	-0.254834	6.95303e-05
PSMD2	-0.254314	5.70311e-09
PADI1	-0.253531	3.29995e-07
TFIP11	-0.251856	2.39184e-06
CA1	-0.251568	0.000413405
SLC45A2	-0.250472	0.000175891
ARHGDIB	-0.249597	2.99615e-05	o
FKSG49	-0.249171	1.41338e-05
DNM3	-0.248358	0.000186508
KLK3	-0.24802	2.44177e-05
SARDH	-0.247656	2.87355e-07
TNNT3	-0.247633	9.82272e-06	o
FCER1G	-0.244792	0.000650848
SIPA1L3	-0.244582	4.63678e-07
CXorf21	-0.244072	0.000151841
TARDBP	-0.243549	5.07894e-07
SLC1A4	-0.240615	7.09019e-05
CD300C	-0.24045	3.06497e-05
LSP1	-0.239006	0.000579598
UBE2L6	-0.238425	6.08764e-05
BLVRA	-0.238392	3.9272e-05
TLL1	-0.237735	0.000253862
PCDH11X	-0.237224	0.000481868
SELPLG	-0.237126	9.58894e-05
ACTL6B	-0.235917	1.84865e-06
LILRA2	-0.235808	0.000385554
IL1RN	-0.235331	0.000385554
GPR6	-0.235278	0.000194406
GPSM3	-0.23489	5.90233e-05
JAK2	-0.234562	3.64626e-05
SCN8A	-0.23256	3.27936e-05
SLC7A9	-0.232115	1.38116e-05
LAIR1	-0.23029	0.000352075
SNAP29	-0.229638	6.21449e-09
FCGR2A	-0.229442	0.000352075
GLUL	-0.229028	1.28965e-05
SLC11A2	-0.22736	0.000559518
SCFD1	-0.227052	4.02651e-06
TBX4	-0.226466	3.54885e-05
TGDS	-0.225709	1.87872e-06
SIGLEC6	-0.22556	2.28621e-06
AIF1	-0.224864	0.000932906
NHLH2	-0.223927	9.62911e-06
YBX1	-0.223867	0.000382868
PGLYRP1	-0.222882	0.000162659
CLDN6	-0.222516	0.000246702	o
ZNF550	-0.220532	0.000399074
SLC16A5	-0.219424	0.000451158
PRKAR2A	-0.219309	5.59054e-07
GK	-0.21832	2.30345e-06	o
SYF2	-0.218061	1.63376e-07
DUSP13	-0.217957	4.72261e-05
P2RX7	-0.217297	0.000763466
HIST1H2AJ	-0.216762	0.000557159
TSPAN4	-0.215148	0.00019098
TNS3	-0.215023	0.000146791
RBBP7	-0.214498	8.97577e-06
MAPK10	-0.21265	0.000247688
CEACAM3	-0.212649	2.24233e-06	o
SNX4	-0.21246	2.09478e-06
MMP25	-0.212449	0.000511544	o
FAM49A	-0.212405	0.000385302
PTGER1	-0.212316	0.000193146
CD226	-0.212241	0.000702693
CEACAM21	-0.211882	0.000226349
FLOT2	-0.211699	1.41975e-06
CEBPE	-0.211456	0.000997841
TNFSF9	-0.21013	0.000224052
BCL6	-0.209909	0.000152699
PRKACA	-0.209231	7.86225e-06
ALDH3B1	-0.207873	0.000119224
MYL4	-0.20715	1.77381e-05
CR1	-0.207006	0.000297815
SNAPC5	-0.20634	0.000168604
MPP1	-0.205096	0.000867408
RAB30	-0.203886	0.000943254
AGTPBP1	-0.203637	9.74449e-05
MTAP	-0.203305	1.47402e-05
OLIG2	-0.199767	8.75922e-05
TYRO3	-0.199208	0.000812908
METTL9	-0.198634	7.23165e-10
TTLL5	-0.198281	1.08044e-05
SLC7A6	-0.196975	7.21317e-05
SPHK2	-0.196608	0.000346373
ZNF395	-0.195567	4.00014e-05
KCNMB4	-0.195271	0.000152699
PTPRO	-0.193475	0.000413405
PSMB2	-0.193224	5.62292e-08
CASP10	-0.193004	9.23262e-06
RLN1	-0.192851	0.000671408
TK2	-0.19272	2.65641e-07
HOXD9	-0.191554	0.000186508
IGBP1	-0.189795	3.26904e-06	o
HIVEP3	-0.187383	0.000905726	o
RPGRIP1	-0.186536	1.86218e-05
MYBPC3	-0.185054	0.000577109
LILRA5	-0.18502	5.73409e-06	o
MXI1	-0.184858	0.000352075
ELF1	-0.184824	4.75042e-05
HOXA6	-0.183879	0.000442385
EPOR	-0.183083	2.9822e-05
PPP1R8	-0.182576	8.11964e-06
ZHX3	-0.182574	5.46842e-05
CYB5R4	-0.181944	8.99948e-05
PRKCG	-0.18186	0.000175891
WBP11	-0.180161	9.74449e-05
CMAS	-0.179431	0.000189582
TMEM19	-0.178217	0.000903173
MSRA	-0.177802	0.0001453
TERF2IP	-0.17748	7.35669e-06
STX10	-0.177039	0.000930581
PIK3R5	-0.176879	6.23656e-05
TANK	-0.175787	0.00015837
SUPT5H	-0.173658	4.60176e-08
RPS6	-0.172323	2.67692e-07	o
HBZ	-0.171974	0.000191398
SOCS6	-0.171299	0.000135365
PCDHA2	-0.168568	0.000826925
MOBP	-0.1682	3.06246e-06
LCMT1	-0.165072	0.000211236
PNPLA2	-0.164209	0.000250983
CASP4	-0.164144	0.00081014	o
CRLF3	-0.162752	0.000152699
AP1S2	-0.162739	7.28098e-05	o
NBN	-0.162109	9.55581e-05
GTF2F2	-0.161516	0.000460285
NDUFB3	-0.16102	0.000305723
GRB2	-0.160191	1.04948e-05
RPL18	-0.15931	4.41145e-09
BCL2L1	-0.158246	0.000209489
CCDC22	-0.156238	0.000170441
ZNF32	-0.155549	0.000115292	o
ATP7A	-0.155527	0.000124166
SPTLC1	-0.155455	3.41404e-05
RLF	-0.153336	0.000365891
LTA4H	-0.151507	0.00028085
YARS	-0.149643	0.000109597
DENND3	-0.147043	0.000940864
SEMA7A	-0.146293	0.000228642
TNKS2	-0.146281	0.000896801
WDR44	-0.145818	4.12477e-05
MOSPD2	-0.14087	1.35939e-05
NUP98	-0.140575	1.80366e-05
GTF2B	-0.137264	2.63743e-05
STYXL1	-0.136829	0.000224611
MRPS31	-0.136693	0.00022118
STAMBP	-0.134854	0.000769117
UBE2NL	-0.134791	0.000157466
SLC25A28	-0.134786	0.000984073
UBE2G2	-0.132829	0.000365891
PQBP1	-0.13202	0.000121776
UXT	-0.130863	0.000607748
CYLC1	-0.126869	0.000794715
ING3	-0.126371	0.000626567
WBP4	-0.124874	0.00069207
TOE1	-0.124761	0.000336676
MTF1	-0.119092	0.000216223
RPL19	-0.117625	0.000175049
MAPK14	-0.117051	0.000350956
GPBP1L1	-0.114469	0.000467846	o
NSUN3	-0.103002	0.000257541
UBC	-0.0834061	0.000490873	o
SAFB	0.103817	0.000256701
NMT1	0.106772	0.000943574
MAP2K5	0.110266	0.000368444
ARIH1	0.112184	0.000319331
KLHL20	0.112489	0.00071374
DPP8	0.113404	0.000794715
MAN1B1	0.120707	0.00088178
RIN3	0.121426	0.000100742
XPO1	0.123981	0.000194677
TXN2	0.124097	0.000652782
TOP3A	0.125014	4.25432e-05	o
C1D	0.126343	0.000897324	o
CCDC51	0.127806	0.000583882
WIPI2	0.128748	0.000518011
PTMA	0.128763	9.34914e-05
ATRN	0.129904	0.000370075
UBE2Q1	0.129998	2.85467e-05
POLR2H	0.132236	0.000804888	o
TRIP4	0.135424	9.5881e-05
CAND1	0.135548	0.00059717	o
POLG	0.136129	2.55333e-05
PARP16	0.136215	3.07849e-05
LMAN2L	0.137274	0.000511544
WDR1	0.137332	0.000160241
PHF7	0.138442	0.00014246	o
PIP5K1A	0.140781	0.000351768
MYO9A	0.142808	0.000158064
GTPBP3	0.144666	2.44177e-05
CIAO1	0.145731	7.80739e-09	o
UNC45A	0.146286	1.01051e-06
NDUFB5	0.146903	0.000502245
MTX2	0.15002	0.000109787
COMMD4	0.150934	6.67799e-05
RBCK1	0.151489	0.000671359
CNNM3	0.152492	4.44549e-05
CEP192	0.152762	0.000562086
FN3KRP	0.152986	0.000250983
PTGES3	0.153354	3.38317e-05
RNH1	0.153848	7.18244e-05
BLZF1	0.154003	0.000256701	o
MAP2K4	0.154044	0.000338558
CLTC	0.154074	1.29192e-05
TIMM13	0.154613	0.000145972
CYB5R1	0.155025	0.000777307
SETD6	0.155441	0.000856775	o
ZNF282	0.156513	4.59603e-05
STAM	0.15725	0.000145972
STAT5B	0.157777	9.39943e-06
TRIM44	0.157865	0.000466399
NOTCH4	0.158621	0.000140232
KIF1B	0.1594	0.000617569
RABIF	0.159648	9.56282e-06	o
HMGN4	0.160211	0.000257756
IL17RC	0.160898	0.000418422
MEF2A	0.161488	0.000211236
NPTN	0.161608	2.50449e-05
RIT1	0.162369	0.00030703
SNX2	0.162409	0.000186388
ZNF609	0.162552	5.96482e-05
INPP5E	0.162703	0.00022118
SLC39A1	0.164009	0.000617569
C11orf24	0.164187	3.59582e-06
BAK1	0.164617	8.99948e-05
SPG21	0.166697	0.000244522
TMEM127	0.167161	0.000256701	o
LRRC59	0.16862	0.000189544	o
FASTK	0.169222	7.33235e-06
MPP2	0.169396	0.000815212
KIAA0355	0.170129	1.34566e-05
PMM1	0.170936	1.9319e-05
SF3B4	0.170972	0.000102982	o
GALNT2	0.171181	9.69209e-05
BBS4	0.171821	0.00076749
DHX40	0.173031	0.00041044	o
BOLA1	0.17355	0.000426462
BMP1	0.173653	0.00022118
PDLIM2	0.173818	9.74449e-05
GAA	0.173959	0.000355525
EHD3	0.174025	8.44772e-05
ATP13A1	0.174503	6.97318e-06
ARHGEF10L	0.174777	7.69399e-06
DBN1	0.175087	0.000838372
MTR	0.17536	5.20483e-06
PPA2	0.176352	0.000211236
TTC19	0.176417	0.000124166
DET1	0.176529	7.35669e-06
TRADD	0.177241	2.73888e-06
LY6H	0.177479	0.000846957	o
AMOTL2	0.178382	0.000939844
SLC23A2	0.179	4.32573e-07
ACTR1B	0.179278	7.80739e-09
JAG2	0.181552	3.13573e-05	o
CACNB3	0.182043	0.000573212
SOCS3	0.182048	9.76407e-05
MAP3K6	0.182064	0.000439849
PFKFB2	0.182711	7.07826e-05
PFAS	0.183296	7.44504e-05
NGRN	0.183545	3.74919e-06
SDHC	0.185387	1.06771e-06
EPS8L2	0.185966	0.000352256
APP	0.186686	0.000701581
DZIP3	0.18714	0.000102952	o
ITGAV	0.187396	0.000109323
INSIG2	0.187948	0.000109787
LTB4R	0.188015	0.000127366
XRCC5	0.188305	1.77967e-06
JOSD1	0.188315	1.38249e-05
PALLD	0.188834	0.000559552
MICA	0.189137	0.000900939
RUSC1	0.18962	7.33711e-06
ATP10D	0.190589	0.000439849
MASP2	0.190753	5.91992e-05
ATP8B2	0.19084	8.4965e-05
ACVR1	0.190885	2.60017e-05
PIGT	0.191378	4.51281e-05	o
PAQR3	0.19194	0.000104384
STARD3	0.192533	0.000329748
DCHS1	0.192777	0.000210401
GRM8	0.193515	1.28965e-05
SPRY4	0.193522	0.000151841
APPBP2	0.193901	1.11091e-05	o
RYK	0.193912	0.000172031
TCEA1	0.194008	1.70069e-05
LAMC1	0.194399	0.000139175
SPATA2	0.195423	2.60017e-05
ZFHX2	0.195489	7.09019e-05
TNFAIP1	0.197658	3.13135e-09
MKS1	0.197947	3.38617e-06	o
DCUN1D4	0.198739	7.45945e-07
PER3	0.200873	0.000285095
IPO9	0.200907	2.67692e-07	o
XPNPEP1	0.201064	3.06497e-05
LMCD1	0.201737	0.000617569
NOL3	0.2029	0.000160186
LRRC49	0.203071	0.000462362
RBMS2	0.203513	1.86145e-05
ALS2CL	0.204886	2.67692e-07
HOXC4	0.205347	0.000292862
DLX4	0.206009	5.49344e-06
DCBLD2	0.207719	0.000459141
GNB3	0.207875	1.36372e-06
COBLL1	0.208957	3.1805e-05
FGFR1	0.20999	0.000692214
ELAVL1	0.210019	3.13135e-09
TUBB3	0.210078	0.000731621
OPLAH	0.210442	0.000351275
FZD2	0.211203	0.000409348
CLDN15	0.212651	2.13575e-05
EVC	0.213291	0.000109204
LCAT	0.213448	7.50204e-05
STAP2	0.213712	6.49586e-05
ANKRD6	0.213864	0.000411663
GATA2	0.216269	7.19275e-05	o
LAMB2	0.217964	0.00071374
ZBTB44	0.219178	0.000555007
JAM3	0.220153	0.000547505
RHBG	0.220936	0.000102835
JUP	0.221949	0.000417463
HTR1D	0.221949	0.000794195
PCDH17	0.222589	7.71552e-05
ELMO3	0.223241	0.000622879
GPR176	0.223348	1.84865e-06
FSTL3	0.22373	4.00942e-05
TUBB6	0.224116	0.000573641
MYO1B	0.224555	3.81747e-05
ANTXR1	0.22473	0.000573212
P4HA2	0.226042	4.41484e-06
ZDHHC13	0.22693	2.30069e-05
RGS12	0.230715	5.69722e-08
ELOVL6	0.230749	0.000148531
SCAP	0.231327	6.81135e-08
SLC22A14	0.231538	1.36372e-06
SCAMP4	0.231729	2.04535e-05
TAF4	0.23283	4.41729e-07	o
NOTCH3	0.232852	3.73832e-06
SLCO3A1	0.233095	0.000931323
SEMA6B	0.233224	1.20359e-06
TPM1	0.234198	2.3692e-05
PIGZ	0.234774	3.93123e-05
FAHD2A	0.234883	5.62292e-08
SLK	0.234963	3.67574e-05
RAB22A	0.235525	1.89212e-08	o
RAPGEF3	0.235662	0.000405506
PHYH	0.235692	0.000260249
MYL3	0.237136	0.000717971
FETUB	0.237541	0.000186508
PCDH12	0.237826	1.75009e-05
C1QTNF1	0.238141	1.86333e-05
ITGA9	0.238299	0.000326422
SMNDC1	0.23899	7.33711e-06
TUFT1	0.239459	2.63828e-05
RARA	0.240737	6.11118e-07
CRMP1	0.24097	0.000629512
SH2D4A	0.241078	4.20943e-05
ST5	0.242231	7.19275e-05
CLEC4M	0.242361	9.44156e-05
PAPPA	0.242719	2.67025e-05
RGS10	0.243509	0.000675931
SLC26A10	0.244759	1.86724e-05
CYP46A1	0.245348	0.000527212	o
COL7A1	0.245561	0.000169669	o
SEMA4G	0.246093	5.67497e-07
KDR	0.246296	3.44978e-05
ZNF675	0.247056	0.00010021
MTMR11	0.247484	4.31498e-05
CYP3A4	0.248096	8.22822e-06
MTSS1	0.248824	7.35669e-06	o
ATP10B	0.249584	6.95072e-05
BTG2	0.249636	0.000143311
GPC1	0.249656	4.35242e-06
LARP6	0.250443	9.90435e-05
KRT10	0.25072	1.40659e-09
ITGA1	0.250999	0.000847785	o
WNT2B	0.251272	4.70357e-06
TMEM132A	0.251842	9.23262e-06
NEO1	0.252538	2.49518e-06
CNTNAP1	0.253175	3.79543e-06
SGCD	0.253191	1.29192e-05
PGM5	0.253851	0.000330776
KDELC1	0.254006	4.09489e-05
PREB	0.254426	7.59821e-07
KNG1	0.254682	0.000847153
IL1RL2	0.255337	0.000706661
ILVBL	0.25542	4.60176e-08
RAPGEFL1	0.255774	0.000458006
CD55	0.256293	2.30531e-05
PTPRF	0.256952	6.79651e-05
CTSF	0.25737	5.00335e-05
TSHB	0.258504	2.87355e-07
CFTR	0.258709	1.41338e-05
EFNA1	0.259166	0.000379816
KIF26B	0.259711	0.000363404
RHBDF2	0.259992	7.13236e-05
ARHGEF10	0.260015	3.79543e-06	o
SFTPB	0.26007	5.27974e-11
CYP4F2	0.266297	0.000555007
THAP1	0.266661	9.56526e-08
CYP4A11	0.267218	9.23262e-06
EGFL7	0.270509	3.77925e-05
DNASE1L3	0.271404	0.000836581
PYY2	0.272015	0.000164164
RGS3	0.272711	3.33141e-07
ANGPTL2	0.273519	7.21392e-05
TMEM43	0.274236	4.20961e-07
MEIS2	0.274803	0.000626567
CYP2E1	0.276062	0.000601895
KLF15	0.276576	1.29192e-05
EFNB2	0.277017	0.000439849
MYH10	0.27755	1.69358e-06
PROCR	0.277584	1.88209e-05
HEYL	0.279038	1.92086e-06
ALDOB	0.279817	7.96364e-07
NDRG2	0.280884	0.000343042
SPAG5	0.281633	0.000213239	o
KCNJ8	0.282107	0.000412409
CYP2D6	0.282343	4.42171e-07
RCN2	0.282402	2.86326e-07
SCD	0.282998	0.000703091
CACNA1H	0.283308	0.000284444
SYNGR2	0.284702	1.41338e-05
NR1H4	0.284986	0.000357911
MAN1C1	0.28506	1.35939e-05
PRNP	0.286029	2.73267e-06
LOXL2	0.288051	2.50703e-07	o
RCOR3	0.289244	1.47402e-05
DONSON	0.290315	6.05153e-07	o
TRPA1	0.291423	0.000323443	o
PCOLCE	0.295803	0.00019362
PTGDR	0.296484	2.58772e-05
SMARCD1	0.296675	8.57694e-11
CYP2C9	0.298044	3.22687e-06
SERPINE1	0.298113	0.000983293
CYP2C8	0.300947	0.000130674
ADH6	0.302337	1.98254e-05
NPTX1	0.304229	8.5118e-06
NXPH4	0.308139	3.34112e-06
TRIM16	0.308599	8.06949e-06
NPR2	0.310922	6.65392e-07
CSRP3	0.311419	4.33184e-05
HSD11B2	0.312567	0.000352256
C1S	0.31257	0.000781105
FOXF1	0.312816	7.35669e-06
PXDN	0.313083	2.68925e-05
ATP8A2	0.315033	8.4965e-05
MMP11	0.315155	4.15341e-05	o
EXT1	0.315157	8.63744e-10
ABCC5	0.315891	3.44048e-09	o
GPC3	0.316175	0.000598579
KLKB1	0.316207	0.000236756
FBXO2	0.31639	2.42254e-05
MCC	0.317119	2.15698e-08
FXYD6	0.318856	2.20718e-05
WSB2	0.319366	3.30095e-05
DNM1	0.319684	5.42104e-07
SFTPC	0.320051	1.43168e-10
FCN3	0.320928	0.000127366
PKIA	0.323233	0.000603966
TPSG1	0.324239	1.85301e-05
MST1	0.325885	7.35669e-06
RAMP1	0.326138	4.99931e-07
TMPRSS4	0.326759	0.000776485
NES	0.3272	0.00020216
NDRG4	0.328316	1.84053e-05
PTGIR	0.32943	2.9366e-06
SERPINB6	0.329592	2.0841e-08
FKBP10	0.330516	0.000216354	o
PRRX2	0.331375	6.79651e-05
ACTN2	0.331928	5.20483e-06
SLCO1B1	0.332777	0.000455969
MYL2	0.333186	0.000985029
AEBP1	0.333208	0.000616912
PYGL	0.333806	1.61365e-05
DMBT1	0.334246	1.82254e-09
CHRD	0.334924	6.11118e-07	o
SHC1	0.334936	2.49818e-13	o
EFNA3	0.33517	1.01858e-05
IGFBP3	0.335896	3.48138e-05
COL18A1	0.336571	8.44588e-09
PMP22	0.336694	1.03894e-06
RND1	0.337514	8.90865e-05
CLUL1	0.337531	7.21392e-05
GFPT2	0.337849	2.39032e-07
SDC1	0.34151	6.0931e-05
C5	0.34334	2.09478e-06
KCNE2	0.343487	2.4699e-09
EFNB3	0.343493	3.03324e-07
CDH2	0.343683	6.50199e-05
FNDC4	0.344928	3.27936e-05
AHSG	0.345334	0.000176375
CHST3	0.352031	8.97577e-06
MOCOS	0.352052	7.03413e-05	o
SEMA4F	0.358173	3.71937e-12
HSD17B6	0.359447	7.18244e-05
SULT1E1	0.360028	0.000936063
HNF4G	0.360238	8.78735e-06
ANGPTL3	0.361718	8.22822e-06
PLG	0.362214	2.24233e-06
ADH1A	0.363262	0.000490873
APOB	0.368617	0.00022118
PDE9A	0.370571	0.000435444
SLC2A11	0.371448	8.21328e-07
OSMR	0.372792	1.2919e-08
GPX2	0.373	0.00022118
BHMT	0.379874	2.63743e-05
PRAF2	0.381816	1.1299e-05
F12	0.381852	1.6701e-06
HABP2	0.38467	1.58539e-08
FGA	0.389616	7.35669e-06
CES3	0.390695	1.43113e-10
C4BPB	0.394195	1.25633e-05
TTPA	0.396889	3.33128e-06
BNC1	0.39702	4.60983e-06
HEY2	0.397656	0.000238957
VBP1	0.398475	1.19273e-10
CFHR2	0.403061	1.61365e-05
GSTP1	0.403088	2.05641e-06
ITIH2	0.405108	5.0212e-05
FBXO17	0.409876	2.57895e-05
SERPINB9	0.411258	2.90789e-08
FAM57A	0.418235	1.2231e-12
SLBP	0.422469	1.24273e-09
CD5L	0.424625	2.87355e-07	o
FABP1	0.427667	3.06246e-06
CXADR	0.430125	2.72698e-05
C1R	0.432225	1.87462e-08
ALB	0.437796	6.53914e-05
CRP	0.439244	1.25981e-06
WFDC1	0.440542	2.58302e-05	o
AOX1	0.440679	7.35669e-06
CRABP2	0.448743	0.000290427
HRG	0.451725	2.20212e-07
APOA2	0.453313	1.15332e-05
F9	0.454244	3.24187e-06
APOA1	0.457565	5.38443e-07
C8A	0.458228	7.45945e-07
KDELR3	0.460648	3.91559e-12
LOXL1	0.463635	7.17145e-09
GC	0.477245	7.50204e-05
RGL2	0.479467	1.53759e-12
ISYNA1	0.482685	5.53476e-12	o
SPP1	0.500495	4.35242e-06
MAGEA4	0.508481	0.000729693
FGL1	0.512626	1.19273e-10
ACTA1	0.519425	5.84472e-05
ITIH3	0.51972	1.77865e-07
PLA2G2A	0.521276	0.000104273	o
SPINK1	0.532039	6.05442e-10
TM4SF20	0.533464	1.17831e-08
CKB	0.540634	1.15003e-09
FGG	0.546134	6.5415e-05
SSTR1	0.590695	2.51983e-12	o
CFI	0.592957	1.02947e-10
APOH	0.640857	6.71056e-09	o
C4BPA	0.659479	6.63582e-10
CBS	0.729376	1.03334e-12
TEX264	0.739534	8.68844e-19
FGB	0.799872	1.33042e-11

## Sheet: Supplementary Table S5
** Pathway with 734 DEGs comparing primary with metastasis
Pathway	allGenes	#genes	p-val	genes
Complement and coagulation cascades(K)	79	23	3.3307e-16	SERPINE1,C4BPA,C4BPB,C3AR1,CFI,C5,C8A,F9,CD55,F12,KLKB1,PROCR,MASP2,KNG1,ITGAM,ITGB2,FGB,FGA,CR1,FGG,C1S,C1R,PLG
IL6-mediated signaling events(N)	47	10	1.4601e-06	GRB2,JAK2,HCK,MAP2K4,SOCS3,MAP2K6,BCL2L1,FGG,CRP,MAPK14
Toll-Like Receptors Cascades(R)	141	16	4.5462e-06	APP,MEF2A,SIGIRR,APOB,TLR3,TANK,MAP2K4,UBC,MAP2K6,ITGAM,ITGB2,FGB,FGA,FGG,MAPK14,MAPK10
Drug metabolism - cytochrome P450(K)	70	10	4.4085e-05	CYP2E1,ADH6,CYP2C9,CYP2C8,GSTP1,ADH1A,UGT2B17,ALDH3B1,AOX1,CYP3A4
Jak-STAT signaling pathway(K)	158	13	0.00077567	IL20RA,PIK3R5,STAT5B,STAM,GRB2,JAK2,OSMR,SOCS3,SOCS6,BCL2L1,AOX1,EPOR,LEP
PPAR signaling pathway(K)	72	8	0.0012824	OLR1,PPARD,UCP1,ADIPOQ,UBC,APOA2,APOA1,SCD
TNF signaling pathway(K)	110	10	0.0014964	PIK3R5,CASP10,IL1B,MAP2K4,SOCS3,MAP2K6,VCAM1,TRADD,MAPK14,MAPK10
FGF signaling pathway(N)	47	6	0.0026015	STAT5B,GRB2,SPP1,CDH2,SHC1,FGFR1
EGFR tyrosine kinase inhibitor resistance(K)	81	8	0.0026436	KDR,PRKCG,PIK3R5,GRB2,JAK2,RPS6,SHC1,BCL2L1
Angiogenesis(P)	66	7	0.003277	KDR,PRKCG,GRB7,GRB2,SHC1,EFNB2,FGFR1
** Pathway with 84 metastatic prediction marker genes
Integrin signalling pathway(P)	158	4	5.365e-05	ITGAM,SHC1,ITGA1,COL7A1
Signaling by FGFR2(R)	71	3	0.00011965	SHC1,UBC,POLR2H
VEGFR3 signaling in lymphatic endothelium(N)	25	2	0.00054475	SHC1,ITGA1
Signaling by NOTCH2(R)	28	2	0.0006817	JAG2,UBC
IL2 signaling events mediated by PI3K(N)	35	2	0.0010592	SHC1,RPS6
Signaling by ERBB2(R)	43	2	0.0015886	SHC1,UBC
Signaling by MET(R)	52	2	0.0023066	SHC1,UBC

## Sheet: Supplementary Table S6
ID	Age	Number of chemo before tissue collection	Class	TNBC	Cisplatin_response	SampleType	OS	PFS	Death	Stromal.score	Immune.score	Microenvironment.score	Stemness.score	EMT.score	CIN	TNBC_CMS
RM16r002	64	0	primary	Y	R	FFPE	21.2333	32.6333	1	683.044	612.509	0.1329	0.476391	3.87567	4.01543	SL
RM16r003	62	0	primary	Y	NR	FFPE	21.2333	36.8333	1	-594.215	-444.132	0.0369	0.815113	2.97358	3.93832	SL
RM16r004	75	0	primary	Y	NK	FFPE	21.2333	NA	0	750.833	1001.91	0.1803	0.28983	3.82527	3.02844	LAR
RM16r005	55	7	meta	Y	NR	FFPE	21.8667	36.7667	1	1202.33	996.085	0.1549	0.471959	3.72583	3.976	SL
RM16r006	46	5	meta	Y	NR	FFPE	21.1333	36.7667	1	156.352	562.593	0.0883	0.604013	3.99039	4.6089	SL
RM16r007	36	1	primary	Y	NR	FFPE	21.1333	16.7333	1	-536.615	648.141	0.0316	0.700809	3.41537	4.63492	SL
RM16r008	61	3	meta	Y	R	FFPE	21.1333	29.3	0	583.29	2401.62	0.8472	0.626024	2.97359	2.21609	LAR
RM16r009	50	4	meta	Y	R	FFPE	21.1333	33.5667	1	402.314	889.927	0.0712	0.610757	3.77651	3.85703	LAR
RM16r010	48	1	meta	Y	R	FFPE	20.9667	54.5333	0	945.016	1281.89	0.2574	0.184475	3.99775	2.90132	SL
RM16r013	61	2	meta	Y	R	FFPE	20.4333	30.8	1	1001.01	1239.64	0.2354	0.289709	3.75685	3.79794	LAR
RM16r014	42	0	primary	Y	R	FFPE	20.2	14.5667	0	239.238	504.11	0.2244	0.738952	3.29518	3.82627	SL
RM16r015	51	0	primary	Y	NK	FFPE	20.2	NA	0	847.607	1169	0.2632	0.591865	3.40434	3.61424	LAR
RM16r016	33	1	meta	Y	R	FFPE	20.2	42.7	1	1040.13	848.326	0.2	0.53314	3.50951	2.9542	MSL
RM16r018	49	3	meta	Y	NK	FFPE	18.9	NA	0	317.457	1280.04	0.1851	0.679006	3.56899	4.16675	SL
RM16r019	42	1	primary	Y	R	FFPE	18.5333	46.1667	1	518.802	566.886	0.2361	0.656132	3.19109	3.54507	LAR
RM16r020	53	0	primary	Y	R	FFPE	18.1667	7.93333	0	800.089	1214.84	0.1919	0.531996	3.65064	3.68932	SL
RM16r021	69	1	primary	Y	R	FFPE	17.7333	10.0333	0	-70.4867	902.791	0.0561	1	3.31746	5.08196	SL
RM16r022	67	1	meta	Y	R	FFPE	17.6	17.9333	0	724.563	2620.68	0.7043	0.560187	3.24411	2.98706	IM
RM16r023	47	1	primary	Y	R	FFPE	17.4333	14.4333	0	1104.49	1409.36	0.1241	0.34288	4.27248	3.5847	LAR
RM16r025	55	1	meta	Y	NR	FFPE	16.7	17.5667	1	1210.67	1555.07	0.2217	0.287875	4.05635	3.51638	MSL
RM16r026	68	1	primary	Y	NR	FFPE	16.3	16.5333	1	302.333	-58.3969	0.0562	0.756229	3.64555	4.85518	SL
RM16r029	57	1	meta	Y	NK	FFPE	15.3333	NA	0	-33.5271	1006.56	0.0934	0.55268	4.18597	3.98185	LAR
RM16r030	59	0	primary	Y	NR	FFPE	14.7	15.3	1	-480.227	-862.418	0.0246	0.78808	3.23773	3.9955	SL
RM16r033	50	1	primary	Y	NK	FFPE	10.6667	19.5667	0	412.796	1914.39	0.1481	0.776958	3.81624	4.87263	SL
RM16r035	67	2	meta	Y	NR	FFPE	8.73333	17.5667	1	-28.1449	1016	0.1946	0.443091	2.6046	1.91414	LAR
RM16r039	41	6	meta	Y	R	FFPE	7.1	37.7333	0	-1092.62	-277.858	0.0136	0.942649	3.07334	5.1896	LAR
RM16r041	46	1	meta	Y	R	FFPE	6.66667	36.8	1	-795.594	-7.00892	0.0211	0.941063	3.33804	5.12475	SL
RM16t01	41	4	meta	Y	NR	FF	23.7333	25.4	1	306.525	1348.5	0.0973	0.611309	3.65774	4.4153	SL
RM16t02	36	2	meta	Y	NR	FF	21.6667	23.7	1	2172.42	1601.11	0.403	0	3.68517	2.93643	MSL
RM16t03	36	3	meta	Y	NR	FF	22.8333	24.7333	1	558.251	473.381	0.0361	0.521876	3.72035	3.83912	SL
RM16t04	64	2	meta	Y	NK	FF	21.9	NA	0	-60.6107	1166.02	0.0372	0.49821	3.46409	4.05757	SL
RM16t08	37	1	meta	Y	NK	FF	25.1667	26.8	1	156.44	628.698	0.0782	0.430891	3.78198	3.36328	LAR
RM16t10	40	6	meta	Y	NR	FF	15.6	20.2	1	-431.27	457.163	0.028	0.791325	3.44433	4.44203	SL
RM16t11	51	1	meta	Y	R	FF	15.4	23.5333	1	-683.023	213.777	0.0286	0.762841	3.84076	4.2849	SL
RM16t14	29	1	meta	Y	NR	FF	14.6667	16.3	NA	1452.85	2025.59	0.3425	0.39111	3.76838	3.1856	MSL
RM16t15	49	0	meta	Y	R	FF	12.5667	11.6	0	502.596	885.656	0.1496	0.473508	4.19947	3.82497	LAR
RM16t17	61	1	meta	Y	NR	FFPE	12.0333	12	1	1149.18	1881.2	0.3737	0.569454	3.89666	4.20031	SL
RM16t18	44	1	meta	Y	NR	FF	11.8667	14.1333	NA	1104.5	2068.37	0.1756	0.458241	4.07023	4.22618	SL

## Sheet: Supplementary Table S7
Pathway	allGenes	#genes	p-val	genes
Ras Pathway(P)	63	9	4.5126e-05	RPS6KA2,PAK2,ETS1,MAP2K3,MAPKAPK3,PLD2,SRF,MAPK3,MAPK10
Mitotic G1-G1/S phases(R)	130	12	0.00016678	PSMD5,MYC,PCNA,PSMB4,PSMC1,MNAT1,MCM7,MCM10,MCM6,PSMB10,E2F1,E2F4
Mitotic G2-G2/M phases(R)	174	14	0.00020024	PSMD5,GTSE1,PRKAR2B,CEP72,TPX2,PSMB4,CENPF,PSMC1,TUBGCP5,MNAT1,FOXM1,CKAP5,PSMB10,E2F1
DNA Damage Bypass(R)	44	6	0.001069	PCNA,VCP,UBE2B,ISG15,POLD1,KIAA0101
Signaling events mediated by Hepatocyte Growth Factor Receptor (c-Met)(N)	80	8	0.0012245	SNAI1,SH3KBP1,PAK2,RANBP9,ETS1,RAP1A,MAPK3,APC
Wnt signaling pathway(K)	143	11	0.0013538	MYC,PRKACB,CSNK2A2,SFRP1,DAAM1,PPP3CC,DVL2,MMP7,SENP2,MAPK10,APC
C-MYB transcription factor network(N)	82	8	0.0014285	TRIM28,MYC,MYB,ADA,ETS1,PIM1,CASP6,CEBPB
Beta1 integrin cell surface interactions(N)	66	7	0.0017634	COL1A1,TNC,CSPG4,LAMC1,LAMA2,THBS1,LAMB1

## Sheet: Supplementary Table S8
	P-value	log2_fold_change
COL22A1	0.0369451	-1.48549
DSG3	0.0102993	-1.36951
KCNK5	0.00410648	-1.35937
SIGLEC14	0.0187463	-1.32032
LOXL4	0.0202126	-1.25072
CTSL2	0.0343794	-1.17687
NOV	0.0371024	-1.1079
PKP1	0.0149537	-1.06765
WNK3	0.00900082	-1.06214
ANXA8	0.0190808	-1.04968
MYL5	0.0179006	-1.02759
DEFB1	0.0118437	-1.02639
LILRA5	0.00196604	-1.0004
SELE	0.0433568	-0.940137
CDCA3	0.0032156	-0.936367
CDCA7	0.00175631	-0.923532
NLRP2	0.0281804	-0.923333
COX4I2	0.0371973	-0.889019
C6orf124	0.0128218	-0.885571
KIF18B	0.00822712	-0.885011
CPNE5	0.0166972	-0.872687
ETV7	0.0332139	-0.869628
FAM84A	0.0488983	-0.86752
CX3CL1	0.0125602	-0.856483
BAHCC1	0.0184128	-0.852301
ARHGEF19	0.00878305	-0.844337
CENPM	0.0345657	-0.840026
CXCL11	0.0446278	-0.83628
C19orf48	0.00498	-0.815501
MND1	0.0119447	-0.812257
ISG15	0.0208253	-0.810245
EGFL6	0.00947434	-0.808175
GNLY	0.00355716	-0.807654
CD79B	0.0473108	-0.807358
KRT6A	0.0357314	-0.792449
CBX2	0.0224166	-0.781715
GJA5	0.00576108	-0.769878
PLEKHG6	0.0266212	-0.768905
SERPINB5	0.0082661	-0.765585
RTP4	0.0118716	-0.752655
WBSCR27	0.00466192	-0.752086
SPON1	0.0129325	-0.74907
CYP2D7P1	0.0159012	-0.745119
PLEKHF1	0.00542702	-0.730089
ODF3B	0.00359788	-0.726841
DAPK2	0.0134606	-0.721572
MMP7	0.00997535	-0.717284
JPH1	0.0276169	-0.714902
SH2B2	0.0427023	-0.713908
CHDH	0.0380483	-0.705284
TST	0.034689	-0.692144
ALPL	0.0267595	-0.683543
NPM3	0.0178955	-0.679855
VDR	0.00178991	-0.679674
CDCA5	0.0426804	-0.666313
RAB40AL	0.0213795	-0.664014
B4GALNT3	0.0249241	-0.663897
GNA15	0.0299725	-0.661091
PACSIN3	0.00751773	-0.649194
CSPG4	0.0346277	-0.642966
MCM10	0.0106677	-0.640222
FCGR1B	0.0241627	-0.637957
C6orf26	0.0158113	-0.636814
OASL	0.0367768	-0.634852
E2F1	0.0251907	-0.631293
KRT23	0.0489068	-0.627126
C15orf52	0.0178167	-0.62418
EYA2	0.0148684	-0.618873
GPR161	0.0103137	-0.618868
TEAD4	0.00103513	-0.618696
SLMO1	0.0258448	-0.615667
SOCS3	0.0235214	-0.615579
SNAI1	0.0122518	-0.615436
BCL6B	0.0374925	-0.614185
TOMM34	0.00347121	-0.613805
COMP	0.0490371	-0.60637
RPL32P3	0.0328679	-0.598268
HR	0.0332675	-0.593405
FOXM1	0.00997745	-0.589452
FES	0.0214278	-0.581104
ADAMTS4	0.0306733	-0.581103
DNASE1L1	0.00684304	-0.577983
GTSE1	0.0021878	-0.576835
C1QTNF6	0.0393563	-0.576755
CPXM2	0.00321894	-0.575824
SFRP1	0.0385295	-0.575337
VASN	0.0332812	-0.567625
TBX2	0.033269	-0.566743
ICAM2	0.0155008	-0.565339
MICB	0.026198	-0.562185
PUSL1	0.0316881	-0.560904
CCDC34	0.0127987	-0.545779
RELB	0.0111779	-0.545732
FAM70B	0.0440822	-0.537709
FAM118A	0.0387987	-0.533898
ZMAT5	0.0116073	-0.533815
SLC38A7	0.0306753	-0.528933
SNX21	0.0152664	-0.528921
CHMP4C	0.0446274	-0.520495
KIAA0101	0.0345252	-0.519044
GBP4	0.0102442	-0.518548
PSTPIP1	0.0326323	-0.517027
IGFBP3	0.000147968	-0.512369
JMJD4	0.0158398	-0.498317
MOCOS	0.0464051	-0.497425
AURKB	0.03877	-0.496322
CRISPLD2	0.00968001	-0.493336
COL5A3	0.049295	-0.490827
RPUSD4	0.017659	-0.489254
MIER2	0.0203282	-0.481266
KIAA0664	0.00676677	-0.477026
TPX2	0.0041441	-0.473524
POLD1	0.0178725	-0.473185
CYB5R2	0.0184679	-0.471899
CMPK2	0.0289651	-0.470872
CSF3R	0.0400074	-0.468257
ADA	0.00680067	-0.468036
CD320	0.0124832	-0.466222
RRS1	0.0349827	-0.462407
ORC1L	0.0484512	-0.460774
C22orf9	0.0124264	-0.459524
MST4	0.0408371	-0.459234
PLEKHJ1	0.0329488	-0.456187
ISLR	0.0406133	-0.453958
FAM21B	0.0186875	-0.45339
CDH5	0.0228502	-0.452587
ADAMTS5	0.0254574	-0.452526
TMEM189	0.0438143	-0.45238
GPX7	0.0106054	-0.45223
FNDC1	0.0272782	-0.451161
SMARCD3	0.0379616	-0.450961
ARAP3	0.0348175	-0.449839
COL8A1	0.0285616	-0.449789
TCEA3	0.00178369	-0.447277
COTL1	0.0267922	-0.447216
PILRA	0.0233387	-0.446325
MYH14	0.0471525	-0.443247
TIMM16	0.0191896	-0.442056
SPON2	0.0401665	-0.439681
CNKSR3	0.0237573	-0.439254
PRC1	0.0245783	-0.438513
CEP72	0.00772413	-0.437195
C1RL	0.0149228	-0.436337
UBQLN4	0.0461666	-0.433371
ARHGAP27	0.0266824	-0.429773
SMOC2	0.013456	-0.428948
MAP3K6	0.0156545	-0.428721
PIM3	0.0155898	-0.425273
HAPLN3	0.00943815	-0.425263
PPM1F	0.0288039	-0.424984
FBLIM1	0.0182203	-0.424502
DFFA	0.00875663	-0.423072
MLKL	0.0190062	-0.421821
SFRP2	0.020544	-0.42053
ARHGEF9	0.0126505	-0.420425
AS3MT	0.0217046	-0.418411
RARG	0.00602477	-0.418006
UNC13D	0.0390751	-0.416948
ARMC6	0.037312	-0.414924
ETS1	0.00114248	-0.414884
ASAP3	0.00128293	-0.414832
PTCD1	0.0105945	-0.414368
TAPBPL	0.0161783	-0.413559
CEBPB	0.0198979	-0.412291
EGFL7	0.0402385	-0.412229
RPS6KA2	0.0131386	-0.411386
POLRMT	0.0499567	-0.409245
LY6E	0.00433691	-0.407695
PITPNM2	0.0387048	-0.406708
ISYNA1	0.0210451	-0.404852
LTBR	0.000851966	-0.396151
MAD2L1	0.0401347	-0.396035
IFI35	0.0371718	-0.394116
IKBKE	0.0186436	-0.393975
AFAP1L1	0.00999481	-0.392734
TYMP	0.00484846	-0.388731
KIF20A	0.0391105	-0.387503
KIRREL	0.0173732	-0.386792
NOP16	0.0171865	-0.386726
IQGAP3	0.0378557	-0.38525
ZNF454	0.0351245	-0.382872
C1orf38	0.00573945	-0.3809
MYC	0.00336067	-0.378215
HDAC5	0.0127522	-0.376558
C6orf129	0.0337798	-0.375712
TMEM9	0.0390929	-0.375516
ADCY3	0.0041659	-0.373778
JAG1	0.00107847	-0.372209
AMOTL2	0.0489871	-0.371716
MECR	0.0212179	-0.369288
TSPO	0.030076	-0.367727
LPIN3	0.0292517	-0.367155
DHX33	0.011866	-0.361645
TBRG4	0.0308167	-0.360292
SH3KBP1	0.000467684	-0.355723
MKL1	0.0175076	-0.355555
NUMBL	0.0175893	-0.351784
PARVB	0.00225677	-0.35175
WIZ	0.0489079	-0.35169
NADK	0.0148331	-0.349486
LMNB1	0.00956296	-0.348577
CENPF	0.0397383	-0.348032
GRAMD4	0.0123026	-0.345502
GAS6	0.00704535	-0.344623
MCM7	0.00192245	-0.343305
IFIT3	0.0400651	-0.343194
NAGA	0.00198826	-0.343024
STK25	0.00816286	-0.342983
EPHB4	0.00317842	-0.341259
SLC39A1	0.0373043	-0.340413
BAK1	0.0450882	-0.338354
DNASE2	0.0447892	-0.337312
CENPB	0.0452446	-0.337054
BGN	0.00108013	-0.336693
MGAT4B	0.00623411	-0.335194
PALM2-AKAP2	0.000672023	-0.334934
HMBS	0.0494735	-0.334073
LEMD2	0.00483732	-0.333381
HCFC1	0.0138843	-0.333035
BAX	0.00137294	-0.332852
APOL6	0.000653487	-0.332363
NSUN5P1	0.0216637	-0.325501
PSMB10	0.0107875	-0.323949
EIF6	0.0274751	-0.323422
SRM	0.0102505	-0.322679
TTLL12	0.0456951	-0.322255
DCPS	0.0448857	-0.322246
ARHGAP8	0.0388003	-0.322129
DVL2	0.0115672	-0.321282
LAP3	0.00139105	-0.321123
RARRES2	0.044262	-0.320111
NNMT	0.0318764	-0.318237
LPCAT1	0.0238403	-0.316848
IGFBP4	0.0434405	-0.315507
TAF6	0.0207985	-0.313317
TSPAN4	0.0298639	-0.312898
LMF2	0.0335858	-0.312828
NHSL1	0.0120838	-0.309843
OBSCN	0.0364956	-0.307082
C20orf111	0.00836117	-0.306431
UBE2T	0.0170284	-0.305808
PIM1	0.0235042	-0.305366
SMTN	0.0152135	-0.303073
PPIC	0.0155526	-0.302004
ARSA	0.034275	-0.300666
MFGE8	0.0123594	-0.300085
TIMM13	0.0459906	-0.297343
B4GALT2	0.0251486	-0.294046
PEX5	0.00727496	-0.29338
ENG	0.00303291	-0.292687
TRAF2	0.00769321	-0.292114
FECH	0.0114817	-0.291566
SIRPA	0.0268645	-0.29104
GSDMD	0.0303294	-0.29059
EIF5AL1	0.0403197	-0.290014
CC2D1B	0.0089246	-0.286294
ACAA2	0.00983492	-0.286234
SHANK3	0.0464335	-0.286184
PLEKHG1	0.00653808	-0.286063
GALK1	0.0461922	-0.285788
TNC	0.0395602	-0.284628
IFI27	0.0268617	-0.279389
SRF	0.0326209	-0.279209
MTHFD1L	0.00597513	-0.278929
EVC	0.0415251	-0.27859
TEAD2	0.00368971	-0.276128
TMEM176A	0.0375894	-0.275873
SYNJ2	0.0261565	-0.275842
NCAPD2	0.0159592	-0.274983
BTBD2	0.0348693	-0.272774
STOML2	0.00063499	-0.272135
MPP1	0.0429436	-0.272134
PPP1R14B	0.0414251	-0.271848
NELF	0.0194024	-0.271776
RGS3	0.0404493	-0.269522
ZNF462	0.0313262	-0.269325
AFAP1	0.0189971	-0.268926
EXOC8	0.0338083	-0.268612
HIST1H2BE	0.0378845	-0.26678
LAMC1	0.00108163	-0.26634
PCNA	0.00624968	-0.266268
TNK2	0.038631	-0.263336
ST5	0.0119114	-0.263043
PI4KAP2	0.0415823	-0.263026
IRAK1	0.0320239	-0.262524
MGC72080	0.0214321	-0.261811
RCN1	0.00289449	-0.260014
EARS2	0.0313892	-0.257531
SUN2	0.0453847	-0.256471
NFIX	0.041733	-0.255878
C1orf107	0.00962118	-0.254451
ANXA11	0.00393765	-0.253814
NEU1	0.0442504	-0.253215
IRF2BP2	0.0175771	-0.253134
SERPINB1	0.0346163	-0.252317
BTN3A3	0.0444408	-0.252083
NT5DC2	0.0191103	-0.25138
PLXND1	0.0246678	-0.250508
C9orf82	0.0412213	-0.249871
LDHB	0.00227509	-0.249546
GNL1	0.00987004	-0.249081
STIM1	0.0133763	-0.245997
CTSS	0.00882512	-0.245428
BLMH	0.0129596	-0.244792
ELF4	0.035341	-0.243701
GATAD2B	0.0226504	-0.243258
WARS	0.0151289	-0.240606
POLDIP3	0.00809202	-0.238219
ZNF512	0.00388547	-0.237221
A2M	0.00219139	-0.236976
MED16	0.0433467	-0.236465
SRPK1	0.0459324	-0.23589
CDK16	0.0175189	-0.235294
MGRN1	0.0357947	-0.234813
ZBTB2	0.0489646	-0.234747
KIAA1949	0.0229039	-0.234729
RELL1	0.0397656	-0.234717
SFRS2	0.0376609	-0.234333
BAG1	0.00435194	-0.233909
HMGA1	0.0373619	-0.233017
RIT1	0.028383	-0.232
BPNT1	0.0443175	-0.231737
FYCO1	0.018249	-0.231262
WDFY1	0.0145019	-0.230745
PUS7	0.0112258	-0.230151
EFEMP2	0.01573	-0.230036
ZNFX1	0.00348221	-0.228553
TSPAN3	0.00615393	-0.227107
IFITM1	0.0234453	-0.224473
IMPDH1	0.0106238	-0.223551
MAP2K3	0.0445456	-0.221228
OBSL1	0.040427	-0.220209
GBP1	0.0166117	-0.219989
DHX16	0.0373688	-0.217118
UBL7	0.0432072	-0.21698
MAPKAPK3	0.0211625	-0.216358
MED24	0.0465757	-0.213348
MLLT4	0.0143418	-0.213143
MYO1C	0.00709763	-0.212268
NFATC2IP	0.0374999	-0.211371
THBS1	0.0129887	-0.211186
AK3	0.0231147	-0.210905
MLF2	0.0476182	-0.210347
UBN1	0.0243923	-0.209596
MRPL9	0.0133004	-0.209078
PMP22	0.0201142	-0.208677
CUTA	0.0440227	-0.207837
CRELD2	0.0414315	-0.207812
STAT6	0.0202124	-0.207502
IFI30	0.0234319	-0.206966
ZNF532	0.0277538	-0.206763
SNRPB	0.0145548	-0.206444
ARHGAP1	0.0233285	-0.206038
ARHGEF2	0.0118666	-0.205474
CNN2	0.0315465	-0.204634
HLA-DRB1	0.0386853	-0.204498
DNPEP	0.0323337	-0.204176
S100A10	0.0449232	-0.202283
BRD1	0.0328879	-0.201202
TSR1	0.00486374	-0.200906
LGALS9	0.0133103	-0.200157
SNX9	0.0360552	-0.200013
CD9	0.0333685	-0.198429
GNB2	0.0245057	-0.19761
FKBP11	0.026654	-0.195282
MCM6	0.0306718	-0.194251
STK38	0.0111376	-0.193558
KIAA0020	0.0273376	-0.193004
SH3PXD2B	0.0330963	-0.19221
GTPBP4	0.0162198	-0.191809
MRPL51	0.0141867	-0.190874
C1orf85	0.0345816	-0.190196
UCK2	0.0455176	-0.189913
XPNPEP1	0.00676349	-0.188859
BTN3A2	0.0452682	-0.1877
CXCL12	0.0370925	-0.186993
PHB2	0.00982626	-0.185793
TRIM4	0.0308604	-0.185602
C1orf66	0.0333807	-0.185416
ATN1	0.0146061	-0.185273
BAT3	0.0132186	-0.185019
IKBKB	0.0203739	-0.184508
EPAS1	0.0450849	-0.183123
SORBS3	0.0472986	-0.18278
DHX57	0.0355046	-0.182613
NF2	0.0206274	-0.182127
AKR7A2	0.0227808	-0.181837
COX7A2	0.0181138	-0.181293
SVIL	0.0296657	-0.179519
NMI	0.0246369	-0.178723
PRELID1	0.0297228	-0.178163
DCTD	0.0120669	-0.176919
RRM1	0.0482245	-0.176681
GTF3C1	0.0349424	-0.176512
TRIM28	0.0449181	-0.175898
SLC25A39	0.0450774	-0.174959
FDPS	0.0187075	-0.174251
ANKFY1	0.0435279	-0.173883
E2F4	0.0289014	-0.172682
MTA1	0.0402459	-0.171745
NFIC	0.044246	-0.170606
FAM3C	0.0461251	-0.170402
ADH5	0.0157313	-0.169083
MYO1E	0.00362307	-0.167981
PLD2	0.049895	-0.167074
SLC38A10	0.0395234	-0.165993
IGFBP7	0.00712175	-0.165059
AP4M1	0.0377747	-0.164719
CKAP5	0.00604554	-0.162452
PRDX3	0.0448202	-0.159148
RUNX1	0.0166902	-0.158837
PI4KB	0.0416717	-0.158168
COL1A1	0.0423879	-0.157942
MAPK3	0.035909	-0.155973
C12orf11	0.00870862	-0.154953
GLT25D1	0.0297545	-0.150184
DDOST	0.0306068	-0.149765
SCO1	0.00721614	-0.148602
AFG3L2	0.0286596	-0.147296
ATL3	0.0252218	-0.146542
GSTK1	0.0177088	-0.14422
IFI16	0.0290495	-0.14384
GGA2	0.00454408	-0.143077
ANXA1	0.043247	-0.142574
GABARAP	0.0302384	-0.140945
ACLY	0.0432515	-0.140563
RRAGA	0.0365218	-0.139483
TATDN2	0.0342314	-0.138275
THOC5	0.0383072	-0.137305
EIF2AK2	0.0367002	-0.134688
CTSA	0.0117385	-0.133814
PSMB4	0.0327078	-0.132436
CLIC1	0.0253162	-0.132159
ARNT	0.0105517	-0.130424
PREP	0.026196	-0.129918
SMU1	0.0250023	-0.129834
FNBP4	0.0168588	-0.125278
RPL18A	0.02116	-0.124947
GNB2L1	0.00764464	-0.124762
PAM	0.0280329	-0.124706
TBC1D22A	0.0449743	-0.123733
XRCC6	0.0332808	-0.122364
C17orf85	0.0301471	-0.119085
CSNK2A2	0.0049305	-0.117076
INTS3	0.0372837	-0.116579
LAMB1	0.0445452	-0.115755
SSR2	0.0155381	-0.113767
ASAP1	0.0403099	-0.1135
WASF2	0.0321291	-0.112334
PRPF8	0.0188696	-0.111742
PFN1	0.022869	-0.1102
FUBP1	0.0150342	-0.106218
BRD7	0.0211498	-0.104952
ADSL	0.026595	-0.100067
ESD	0.0350666	-0.0974647
DAP3	0.0290543	-0.0968959
SFRS7	0.0247624	-0.0967646
CAPRIN1	0.0119489	-0.0926118
IGF2R	0.0258641	-0.0917265
VCP	0.0459549	-0.0888584
SRRM1	0.0404336	-0.0823925
RPS6	0.0471433	-0.0803476
RPL4	0.0326223	-0.0783197
DDX3X	0.0274112	0.0713754
RANBP2	0.0106645	0.0773675
ZNF638	0.0446084	0.0861607
SAPS3	0.0278986	0.0873276
ATP2C1	0.0345064	0.0939764
JMJD1C	0.0133145	0.100011
BBS2	0.0358203	0.105397
RSPRY1	0.0260715	0.1061
NIPBL	0.0259123	0.106958
UGGT1	0.037703	0.107203
WDR75	0.0137091	0.111181
CTAGE5	0.0190972	0.111845
SRP54	0.0342343	0.11751
SECISBP2	0.00949664	0.118066
MKLN1	0.0196613	0.119435
MTX2	0.0176763	0.119718
TIA1	0.0090206	0.120799
CNOT2	0.0488047	0.120914
CCPG1	0.0320555	0.122044
GRLF1	0.0175601	0.122147
ZC3H14	0.00165936	0.123198
TM9SF2	0.0183657	0.123237
RGPD6	0.00244316	0.123372
OSBPL9	0.0129397	0.126158
TRIP11	0.00745911	0.126203
SON	0.012684	0.126981
MATR3	0.000356582	0.129234
RPS6KB1	0.0405904	0.129516
ETNK1	0.0445698	0.129691
PSMC1	0.0356938	0.129731
CLK1	0.0051238	0.131287
RAB3GAP1	0.000725195	0.13314
MRPL19	0.021553	0.134328
ADAM9	0.0242269	0.134893
EIF4A2	0.0012801	0.134994
WDR44	0.0164945	0.1351
STXBP3	0.00792815	0.135498
SKIL	0.048344	0.135601
EXOC6B	0.0225414	0.136298
PRPF39	0.0437764	0.136824
PPP3CC	0.0286597	0.138158
CDK8	0.0398954	0.138445
ATRN	0.0136447	0.139128
TUBGCP5	0.0355791	0.139175
TRIM37	0.015848	0.139227
PDHB	0.013586	0.141003
HAT1	0.0419741	0.14316
SEC14L1	0.048927	0.143523
STXBP5	0.0418439	0.143599
FBXO38	0.0186911	0.143692
MAPKAP1	0.0211195	0.146492
KIDINS220	0.00393576	0.147232
KDM3A	0.00578182	0.147275
ZFX	0.0157062	0.148346
KLHL20	0.0206125	0.148772
WBP1	0.0367033	0.149232
OPA1	0.0105874	0.149672
BMP2K	0.00892659	0.149993
STAM2	0.0462134	0.150824
RANBP9	0.0269125	0.151097
CCDC91	0.0401192	0.151186
DHX40	0.0326785	0.152491
BTBD10	0.0289356	0.152717
TMEM57	0.0381759	0.153461
ATAD2B	0.0231528	0.154316
PIK3C2A	0.0101171	0.158925
PTEN	0.0106776	0.159146
USP16	0.00547484	0.159241
KLHDC2	0.0176407	0.160128
RNF14	0.0122497	0.160572
PAK2	0.0232156	0.161253
WSB1	0.0413508	0.161314
MYST4	0.0132331	0.162418
APC	0.0198065	0.164964
CLTC	0.000620392	0.165305
TTC3	0.00929688	0.165806
RNF6	0.0313961	0.166333
ATF1	0.0234736	0.167723
ARMC8	0.00888712	0.167763
USP3	0.00951528	0.169881
AGGF1	0.00668979	0.170258
ZNF766	0.0290747	0.170387
ANKRD12	0.0418104	0.170875
ST3GAL3	0.0413429	0.171274
CLEC16A	0.0120401	0.172644
SUV420H1	0.00391022	0.172905
CCNT2	0.0496763	0.173947
ABCD3	0.0257801	0.173951
HSDL2	0.047492	0.174057
STRN3	0.00319901	0.174469
CLCN3	0.0418523	0.175521
PHTF1	0.0357639	0.175622
ZNF808	0.0213742	0.176004
ANAPC4	0.0238661	0.178232
ZNF611	0.0447358	0.178775
MRPS30	0.0152152	0.179636
RAD51C	0.0331801	0.180585
RAP1A	0.00940847	0.182554
MED6	0.00259052	0.182818
SCP2	0.0398336	0.183246
LONP2	0.0118726	0.18441
MORC3	0.0146184	0.184606
HSPB11	0.0386551	0.187747
LSM14B	0.0225385	0.188139
ZNF708	0.0326163	0.188975
FMNL2	0.0124602	0.190183
ZNF91	0.0116119	0.190193
ATP9B	0.0346194	0.190585
UBA5	0.00198174	0.191121
SRP9	0.01587	0.191582
SLC39A9	0.0282623	0.191604
TLK2	0.0152423	0.191802
UBE2B	0.00149595	0.192738
TTC8	0.0319105	0.195671
SNX25	0.0222996	0.19751
ELOVL5	0.0228847	0.198027
PCCA	0.0131475	0.200595
INADL	0.036776	0.201938
FBXO8	0.0358812	0.202442
SCRN3	0.02887	0.202626
DAAM1	0.00487971	0.202995
ZNF44	0.0354649	0.204129
C17orf81	0.0141084	0.208286
ZNF431	0.0319841	0.208537
RNF146	0.0276904	0.209253
ZNF17	0.0374535	0.209333
C14orf159	0.0476228	0.210379
GAN	0.00992737	0.212197
WFS1	0.0315896	0.213241
DCUN1D1	0.044178	0.214868
GTF2H1	0.00221527	0.216268
ZNF680	0.0126628	0.217987
PPM1B	0.0152015	0.217999
MPP5	0.0231042	0.219211
RGPD5	0.0249627	0.219377
GMCL1	0.00813612	0.220393
TOR1B	0.0364534	0.220417
ARID4A	0.0107611	0.221653
TAF1B	0.0254956	0.222679
GPCPD1	0.0458422	0.22299
MSI2	0.0118079	0.223307
KIAA0232	0.0262913	0.225898
ZNF254	0.0164623	0.227775
PSMD5	0.045919	0.228766
ZNF155	0.0320101	0.228983
GALC	0.0113372	0.229083
TARSL2	0.0360087	0.229899
KCMF1	0.015632	0.231034
FAM177A1	0.013336	0.23199
APPBP2	0.00195516	0.232501
NCOA1	0.00435704	0.232926
LRCH1	0.0291594	0.234133
C12orf65	0.018697	0.234528
GUSBL2	0.0434713	0.23708
SENP2	0.00425361	0.238459
EED	0.0333491	0.238939
CLN5	0.0381184	0.241759
GOSR1	0.000671202	0.244722
INPP5F	0.0389995	0.245165
ZNF678	0.031093	0.24541
BIVM	0.0440341	0.246433
CASP6	0.025042	0.248208
ZNF107	0.0251709	0.254087
ERO1L	0.024955	0.255194
ZNF302	0.0027858	0.257144
MAGI3	0.0300829	0.257363
ZNF69	0.046457	0.257429
ZNF846	0.0272141	0.258807
PTPN4	0.0188533	0.260959
ZNF268	0.00793589	0.262614
SNHG10	0.0254402	0.267698
SUOX	0.0272741	0.268581
ZNF84	0.0282703	0.269216
SMYD3	0.0383192	0.269382
MNAT1	0.000540144	0.270581
ZNF700	0.00891155	0.27173
POMT1	0.0116585	0.274562
PPIL3	0.0190202	0.276278
POMT2	0.0269313	0.276358
MRPL30	0.000403227	0.276758
TDP1	0.00152907	0.277187
BRP44	0.0111701	0.278514
ZNF566	0.049096	0.27917
CCDC45	0.0185633	0.280088
ZNF823	0.0363265	0.282462
N4BP2	0.0348443	0.282739
HSDL1	0.0357184	0.284868
FBXO4	0.0116375	0.284907
SEPT7P2	0.0394349	0.285991
COQ6	0.0252812	0.288138
TCTN2	0.0123818	0.289406
IFT88	0.00539352	0.289769
ING2	0.0286638	0.290898
CCDC111	0.0418103	0.294105
ZNF85	0.0412779	0.295562
DUSP10	0.0367809	0.295566
PLEKHA8	0.0373776	0.297302
KLHL8	0.0138806	0.301931
TMTC2	0.00125133	0.303133
ZNF283	0.00168789	0.303866
C1orf103	0.030506	0.304638
SLC25A14	0.000498282	0.305367
SEPP1	0.0453562	0.307608
ZDHHC17	0.0103643	0.307891
ARHGAP10	0.00576642	0.308214
NFIA	0.0207666	0.310379
CLCN6	0.00819028	0.312731
TSPAN15	0.0250176	0.31443
C9orf95	0.00915414	0.314963
ZNF181	0.0227629	0.315534
WDR78	0.0372011	0.316364
SPATA7	0.0287357	0.319951
ZFP28	0.0247385	0.323022
RAB3IP	0.0373629	0.325577
RPS26	0.00726384	0.326075
LIAS	0.0223773	0.326709
LAMA2	0.0366152	0.329936
CDR1	0.0121346	0.331038
ZNF273	0.0105305	0.331169
INPP5A	0.0270079	0.334276
C4orf34	0.0336509	0.336205
ZNF227	0.00223435	0.338023
LEPR	0.0441723	0.341847
GMFB	0.0487957	0.343462
ZNF449	0.028549	0.347533
KPNA5	0.00430379	0.351773
ABCA5	0.0279006	0.351791
CYP2R1	0.0304851	0.353108
ZNF720	0.0106619	0.354575
ACVR2A	0.00516803	0.354917
KIF21A	0.0102824	0.357621
ZNF138	0.0210409	0.359415
ZC3H6	0.00765053	0.360369
ZNF530	0.0422128	0.361794
MTHFD2L	0.0249137	0.362977
CYB5D1	0.0427994	0.363418
DZIP3	0.00592383	0.364018
ZNF570	0.00308647	0.365533
HBA2	0.0427372	0.368573
PECI	0.0221598	0.37069
SC5DL	0.00555133	0.374018
BMS1P5	0.0168646	0.374799
TANC2	0.0460143	0.376978
ATL1	0.00153381	0.380776
ZNF493	0.00315877	0.382884
AKD1	0.02731	0.384651
PGBD1	0.0106094	0.38646
ZNF643	0.0272001	0.386798
UBXN8	0.0404584	0.387614
RBAK	0.00222796	0.388552
SLC38A1	0.00319481	0.392986
ZNF486	0.0131693	0.398763
ZNF568	0.0054101	0.402466
ZNF350	0.00495073	0.404003
SMPDL3A	0.0153383	0.406663
DBP	0.0162842	0.407304
HERC3	0.000357334	0.408177
SCD	0.00778663	0.411903
AFMID	0.0337642	0.412761
PVRL3	0.0247689	0.416305
HBB	0.0293431	0.419372
ZNF559	0.00496189	0.420001
MEGF9	0.0333281	0.42147
RCAN3	0.0254769	0.422472
PRKACB	0.00224656	0.426164
PATZ1	0.0210204	0.427745
MPP3	0.0475823	0.430002
ZNF90	0.0209583	0.437767
TXNDC16	0.00490316	0.439446
DCLK2	0.0188312	0.440452
ZNF652	0.00226855	0.441153
ZNF737	0.00754966	0.4424
PEX11A	0.0315286	0.442822
TNIK	0.0284364	0.445403
GNPDA2	0.0158557	0.446083
ZNF23	0.00249783	0.449264
ZNF527	0.00129553	0.45423
ZFPM2	0.0205336	0.456383
ZNF790	0.0299178	0.45727
STAMBPL1	0.0112475	0.467545
RAPGEF4	0.02066	0.467593
LASS6	0.0431799	0.471027
ZNF233	0.0135837	0.474777
ZNF583	0.0230934	0.474864
PPP1R3C	0.0421868	0.476504
GDAP1	0.00454846	0.488952
MOSC2	0.0493724	0.489763
CROT	0.0376646	0.493866
PRKAR2B	0.0182509	0.49828
KCNK1	0.0234799	0.501434
SOCS2	0.0447784	0.501933
ZNF222	0.0166257	0.502466
ARG2	0.00071357	0.506748
RPL23P8	0.0413411	0.507384
AADAT	0.01563	0.51411
ABCA6	0.0294183	0.51963
ZNF10	0.0346937	0.525771
SDR42E1	0.0442843	0.525985
GPRASP2	0.0114234	0.531354
C14orf45	0.00066598	0.536927
PLGLB2	0.00742667	0.541455
ABCA9	0.0378812	0.5663
SPEF2	0.0041945	0.574898
ZNF177	0.0408154	0.577306
PCDH7	0.0290967	0.58012
MYB	0.0453141	0.580783
ALCAM	0.00293654	0.587638
KCNMA1	0.000749341	0.591198
REPS2	0.016545	0.592117
PRRT3	0.0236825	0.594109
SLC22A23	0.0213269	0.597371
ZNF620	0.019752	0.612086
TTLL7	0.00190264	0.641276
DGKE	0.0386498	0.641725
MAMDC2	0.0452018	0.653036
KIAA1683	0.047482	0.666221
AQP3	0.044889	0.672174
NBEA	0.00134181	0.678589
GDPD1	0.0380593	0.688094
CACNA1D	0.00797295	0.702411
C14orf174	0.0123784	0.721598
FRMD5	0.0221796	0.726244
KLHDC1	0.000458493	0.741144
C22orf43	0.0343648	0.761739
FMO5	0.0108216	0.795246
CYP27B1	0.0110745	0.817051
PLCL1	0.00430621	0.8261
OSBP2	0.00727157	0.829571
CASC1	0.0466102	0.866701
DNAH7	0.0145859	0.869764
SULT1C4	0.0154539	0.884537
REEP6	0.0387641	0.900721
AK3L1	0.00236334	0.935448
GPR81	0.0408507	0.940769
MTMR7	0.0104851	0.948389
GLRB	0.0399964	0.957966
FOXA1	0.0137335	0.96448
KMO	0.0232803	0.986111
NOVA1	0.0262746	0.989885
MAPK10	0.00871712	1.002
SLC15A2	0.00501077	1.02058
NLGN3	0.00640295	1.02162
SCN8A	0.00849104	1.02647
HPR	0.0491715	1.04595
AR	0.0101116	1.04847
SLC4A8	0.0160099	1.05396
PAR-SN	0.012862	1.05434
ARHGEF38	0.0243167	1.05709
NRXN3	0.0434561	1.07736
PTCHD1	0.0307974	1.12126
RANBP3L	0.032558	1.18987
TFAP2B	0.0362405	1.19342
TMC5	0.00501345	1.20031
LMO3	0.00297813	1.21713
ATP13A5	0.0378281	1.22574
NAALAD2	0.00551551	1.23319
MPV17L	0.0424692	1.2715
SIDT1	0.00269821	1.27152
RELN	0.013287	1.29286
KIAA1257	0.00525027	1.30651
PCDH9	0.0245349	1.35187
ATP13A4	0.00757068	1.39614
P2RY12	0.00042606	1.42609
MUCL1	0.0136998	1.4548
ABCA12	0.0493151	1.47042
PIP	0.0139675	1.50616
ATRNL1	0.0353936	1.61145
CEACAM6	0.0392166	1.63519
MSMB	0.0134062	1.67961
FAM5C	0.0352192	1.68602
MOGAT2	0.0368577	1.71938
EML5	0.000115862	1.74981
GSTT1	0.0238803	1.75165
TOX3	0.0220245	1.7653
CHIT1	0.00798677	1.77982
TMEM63C	0.00540299	1.94535
CLGN	0.035586	2.13698
ABCC11	0.0215089	2.19071
RIMS1	0.0313487	2.26026
ACSM1	0.0268261	2.34986
TFF3	0.0103354	2.43364
SDR16C5	0.032465	2.44773
CYP4Z2P	0.0254281	2.95795
SPINK8	0.0144206	7.29225
